# Supplementary material for: The Occurrence of 275 Rare Diseases and 47 Rare Disease Groups in Italy. Results from the National Registry of Rare Diseases
Source: MDPI journal article supplement (doi:10.3390/ijerph15071470), 2018-07-12
Supplement: s1 [file s1]

**Table S10. Regional Birth Prevalence data**

**Note:** This table compares the medians of the distributions of regional birth prevalence obtained by two notification practices active in the RNMR. The number of regions making up the distributions is also indicated.

| RNMR Code | ORPHA Code | Disease or Disease group           | Number of Regions with BP based on CD notifications | Median of regional BP based on CD notifications | Number of Regions with BP based on AD notifications | Median of regional BP based on AD notifications |
|-----------|------------|------------------------------------|-----------------------------------------------------|-------------------------------------------------|-----------------------------------------------------|-------------------------------------------------|
| RB0010    | 654        | Wilms tumor                        | 1                                                   | 1.2                                             | 5                                                   | 2.0                                             |
| RB0050    | 733        | Familial adenomatous polyposis     | 1                                                   | 1.5                                             | 1                                                   | 1.0                                             |
| RD0050    | 379        | Chronic granulomatous disease      | 1                                                   | 1.5                                             | 2                                                   | 1.8                                             |
| RF0100    | 803        | Amyotrophic lateral sclerosis      | 1                                                   | 1.5                                             | 1                                                   | 1.0                                             |
| RF0140    | 3451       | West syndrome                      | 6                                                   | 5.6                                             | 7                                                   | 12.8                                            |
| RG0040    | 2331       | Kawasaki disease                   | 4                                                   | 5.0                                             | 8                                                   | 4.1                                             |
| RN0010    |            | Arnold-Chiari malformation         | 3                                                   | 1.3                                             | 10                                                  | 4.7                                             |
| RN0020    | 199642     | Microcephaly                       | 1                                                   | 1.3                                             | 2                                                   | 2.0                                             |
| RN0040    | 475        | Joubert syndrome                   | 1                                                   | 1.2                                             | 1                                                   | 1.2                                             |
| RN0050    |            | Lissencephaly                      | 3                                                   | 1.3                                             | 5                                                   | 1.2                                             |
| RN0060    | 2162       | Holoprosencephaly                  | 1                                                   | 1.2                                             | 3                                                   | 1.7                                             |
| RN0110    | 77         | Aniridia                           | 2                                                   | 1.8                                             | 2                                                   | 1.1                                             |
| RN0120    |            | Congenital colobomatous optic disc | 3                                                   | 9.4                                             | 1                                                   | 4.0                                             |
|           |            | Esophageal atresia and/or Isolated |                                                     |                                                 |                                                     |                                                 |
| RN0160    |            | tracheo-esophageal fistula         | 7                                                   | 4.5                                             | 8                                                   | 15.5                                            |
| RN0170    | 1201       | Atresia of small intestine         | 4                                                   | 4.2                                             | 4                                                   | 4.5                                             |
| RN0180    | 1203       | Duodenal atresia                   | 3                                                   | 2.6                                             | 3                                                   | 2.3                                             |
| RN0190    | 96346      | Anorectal malformation             | 8                                                   | 10.2                                            | 7                                                   | 8.0                                             |
| RN0200    | 388        | Hirschsprung disease               | 6                                                   | 9.2                                             | 3                                                   | 4.9                                             |
| RN0210    |            | Biliary atresia                    | 2                                                   | 7.2                                             | 8                                                   | 3.3                                             |
| RN0320    | 2368       | Gastroschisis                      | 3                                                   | 2.6                                             | 2                                                   | 2.2                                             |
| RN0340    | 974        | Adams-Oliver syndrome              | 1                                                   | 1.2                                             | 1                                                   | 1.0                                             |
| RN0430    | 2911       | Poland syndrome                    | 4                                                   | 1.3                                             | 4                                                   | 1.4                                             |
| RN0510    | 464        | Incontinentia pigmenti             | 1                                                   | 3.9                                             | 4                                                   | 1.4                                             |
| RN0570    |            | Epidermolysis bullosa              | 4                                                   | 1.4                                             | 5                                                   | 3.0                                             |
| RN0660    | 870        | Down syndrome                      | 11                                                  | 19.5                                            | 6                                                   | 60.5                                            |
| RN0670    | 281        | Cri du chat syndrome               | 1                                                   | 1.0                                             | 2                                                   | 0.8                                             |
| RN0680    | 881        | Turner syndrome                    | 4                                                   | 3.4                                             | 6                                                   | 3.6                                             |
| RN0690    |            | Klinefelter syndrome               | 6                                                   | 5.6                                             | 4                                                   | 4.5                                             |
| RN0700    | 280        | Wolf-Hirschhorn syndrome           | 1                                                   | 1.5                                             | 1                                                   | 1.0                                             |
| RN0750    | 805        | Tuberous sclerosis                 | 3                                                   | 9.0                                             | 7                                                   | 4.3                                             |
| RN0770    | 3205       | Sturge-Weber syndrome              | 2                                                   | 1.8                                             | 4                                                   | 1.3                                             |
| RN0820    | 116?       | Beckwith-Wiedemann syndrome        | 3                                                   | 4.7                                             | 5                                                   | 5.0                                             |
| RN0850    | 138        | CHARGE syndrome                    | 4                                                   | 1.2                                             | 5                                                   | 1.7                                             |
| RN0880    | 1896       | EEC syndrome                       | 1                                                   | 5.1                                             | 4                                                   | 2.2                                             |
| RN0910    | 374        | Goldenhar syndrome                 | 6                                                   | 3.7                                             | 4                                                   | 3.2                                             |

|        |       |                                                                                                                                                                                                                |   |      |   |      |
|--------|-------|----------------------------------------------------------------------------------------------------------------------------------------------------------------------------------------------------------------|---|------|---|------|
|        |       | Primary ciliary dyskinesia, Kartagener                                                                                                                                                                         |   |      |   |      |
| RN0950 | 98861 | type                                                                                                                                                                                                           | 2 | 3.4  | 5 | 1.4  |
| RN0990 | 570   | Moebius syndrome                                                                                                                                                                                               | 2 | 1.4  | 1 | 1.0  |
| RN1010 | 648   | Noonan syndrome                                                                                                                                                                                                | 3 | 2.3  | 7 | 3.5  |
| RN1080 | 813   | Silver-Russell syndrome                                                                                                                                                                                        | 1 | 1.3  | 1 | 1.0  |
| RN1250 | 887   | VACTERL/VATER association                                                                                                                                                                                      | 1 | 1.5  | 2 | 1.3  |
| RN1270 | 904   | Williams syndrome                                                                                                                                                                                              | 2 | 10.0 | 7 | 3.0  |
| RN1310 | 739   | Prader-Willi syndrome                                                                                                                                                                                          | 3 | 3.1  | 9 | 5.1  |
| RN1330 | 908   | Fragile X syndrome                                                                                                                                                                                             | 2 | 3.1  | 2 | 1.5  |
| RN1350 |       | Alagille syndrome                                                                                                                                                                                              | 2 | 5.3  | 3 | 3.5  |
| RN1410 | 199   | Cornelia de Lange syndrome                                                                                                                                                                                     | 1 | 1.2  | 2 | 3.1  |
| RN1510 | 90308 | Klippel-Trénaunay syndrome                                                                                                                                                                                     | 1 | 3.9  | 1 | 0.6  |
| RN1760 | 912   | Zellweger syndrome                                                                                                                                                                                             | 1 | 1.0  | 2 | 1.1  |
| RP0040 | 1915  | Fetal alcohol syndrome                                                                                                                                                                                         | 1 | 1.3  | 1 | 3.0  |
| RP0050 | 70590 | Infantile apnea                                                                                                                                                                                                | 1 | 4.5  | 1 | 1.0  |
| RBG010 |       | Neurofibromatoses                                                                                                                                                                                              | 5 | 4.5  | 7 | 3.4  |
| RCG010 |       | Primary hyperaldosteronisms                                                                                                                                                                                    | 1 | 4.5  | 1 | 4.0  |
| RCG020 |       | Congenital adrenogenital syndromes                                                                                                                                                                             | 4 | 3.6  | 7 | 3.5  |
| RCG040 |       | Disturbances of aminoacid transport and metabolism                                                                                                                                                             | 6 | 34.3 | 7 | 26.9 |
| RCG050 |       | Urea cycle disturbances                                                                                                                                                                                        | 1 | 3.5  | 5 | 3.9  |
| RCG060 |       | Disturbances of carbohydrate transport and metabolism, excluded diabetes mellitus                                                                                                                              | 2 | 4.2  | 7 | 5.1  |
| RCG070 |       | Congenital alterations of lipoprotein metabolism, excluded: heterozygous familial hypercholesterolhaemia type IIa and IIb; polygenic primary hypercholesterolhaemia; combined familial hypercholesterolhaemia; |   |      |   |      |
| RCG070 |       | Hyperlipoproteinemia type III                                                                                                                                                                                  | 4 | 7.3  | 7 | 3.0  |
| RCG080 |       | Lipid storage disturbances                                                                                                                                                                                     | 1 | 5.3  | 7 | 1.4  |
| RCG140 |       | Mucopolysaccharidoses                                                                                                                                                                                          | 1 | 1.2  | 1 | 1.5  |
| RCG150 |       | Chronic histiocytoses                                                                                                                                                                                          | 1 | 13.4 | 2 | 2.4  |
| RCG160 |       | Primary immunodeficiencies                                                                                                                                                                                     | 5 | 4.3  | 8 | 4.1  |
| RDG010 |       | Hereditary anemias                                                                                                                                                                                             | 8 | 26.9 | 8 | 5.5  |
| RDG020 |       | Hereditary coagulation defects                                                                                                                                                                                 | 5 | 9.4  | 6 | 4.9  |
| RDG040 |       | Primary hereditary thrombocytopenias                                                                                                                                                                           | 1 | 0.6  | 1 | 1.4  |
| RFG010 |       | Leucodystrophies                                                                                                                                                                                               | 2 | 2.7  | 2 | 1.1  |
| RFG030 |       | Gangliosidoses                                                                                                                                                                                                 | 4 | 1.2  | 3 | 2.0  |
| RFG050 |       | Spinal muscular atrophies                                                                                                                                                                                      | 5 | 3.1  | 6 | 4.6  |
| RFG060 |       | Hereditary neuropathies                                                                                                                                                                                        | 2 | 1.4  | 3 | 1.4  |
| RFG070 |       | Hereditary congenital miopathies                                                                                                                                                                               | 1 | 1.2  | 4 | 1.3  |
| RFG080 |       | Muscular dystrophies                                                                                                                                                                                           | 2 | 4.9  | 7 | 3.0  |
| RFG090 |       | Miotonic dystrophies                                                                                                                                                                                           | 5 | 1.3  | 2 | 2.4  |
| RFG110 |       | Hereditary retinic dystrophies                                                                                                                                                                                 | 1 | 2.3  | 3 | 3.3  |
| RNG010 |       | Pseudohermaphroditisms                                                                                                                                                                                         | 2 | 1.2  | 3 | 4.2  |
| RNG020 |       | Multiple congenital arthrogryposes                                                                                                                                                                             | 2 | 1.4  | 3 | 4.0  |
| RNG040 |       | Congenital craniofacial anomalies                                                                                                                                                                              | 4 | 57.1 | 8 | 7.8  |
| RNG050 |       | Congenital chondrodystrophies                                                                                                                                                                                  | 6 | 3.0  | 5 | 4.0  |
| RNG060 |       | Congenital osteodystrophies                                                                                                                                                                                    | 3 | 3.9  | 6 | 7.3  |
| RNG070 |       | Congenital ichthyoses                                                                                                                                                                                          | 4 | 2.5  | 8 | 6.6  |
| RNG080 |       | Chromosomal aneuploidy syndromes                                                                                                                                                                               | 4 | 4.2  | 6 | 3.2  |
| RNG090 |       | Chromosomal duplication/deficiency syndromes                                                                                                                                                                   | 6 | 16.0 | 9 | 8.4  |

|        |                                                         |                                        |      |   |      |
|--------|---------------------------------------------------------|----------------------------------------|------|---|------|
| RNG100 | Other congenital anomalies with intellectual disability | 1                                      | 1.2  | 9 | 4.3  |
|        |                                                         | <b>Mean</b>                            | 5.17 |   | 4.30 |
|        |                                                         | <b>SD</b>                              | 7.99 |   | 7.29 |
|        |                                                         | <b>Pearson correlation coefficient</b> | 0.44 |   | 0    |
