# Supplementary material for: The Occurrence of 275 Rare Diseases and 47 Rare Disease Groups in Italy. Results from the National Registry of Rare Diseases
Source: MDPI journal article supplement (doi:10.3390/ijerph15071470), 2018-07-12
Supplement: s1 [file s1]

**Table S12. Comparison of birth prevalence data with literature data**

**Note:** This table lists the diseases showing a difference higher than an order of magnitude in the comparison with ORPHANET reported data and the results of an ad hoc literature survey. Diseases with a median onset age higher than 6 months have been excluded from the comparison with literature data, since the number of cases diagnosed in the first year of life, condition required for the selection of records, will become less and less exhaustive.

| RNMR Code | ORPHA Code | Disease                              | Estimated National Birth Prevalence (/100 000) | Orphanet reported Birth Prevalence (/100 000) | Source | Comment |
|-----------|------------|--------------------------------------|------------------------------------------------|-----------------------------------------------|--------|---------|
| RC0050    | 508        | Leprechaunism                        | 0.1                                            | 0.10                                          | [24]   |         |
| RC0180    | 205        | Crigler-Najjar syndrome              | 0.6                                            | 0.10                                          | [3]    |         |
| RF0010    | 726        | Alpers syndrome                      | 0.2                                            | 0.07                                          | [3]    |         |
| RF0140    | 3451       | West syndrome                        | 5.7                                            | 3.70                                          | [3]    |         |
| RN0040    | 475        | Joubert syndrome                     | 0.2                                            | 1.13                                          | [3]    |         |
| RN0060    | 2162       | Holoprosencephaly                    | 0.6                                            | 13.40                                         | [3]    | (1)     |
| RN0170    | 1201       | Atresia of small intestine           | 1.7                                            | 16.00                                         | [3]    |         |
| RN0180    | 1203       | Duodenal atresia                     | 1.9                                            | 9.00                                          | [3]    |         |
| RN0200    | 388        | Hirschsprung disease                 | 4.2                                            | 10.90                                         | [3]    |         |
| RN0240    | 2138       | True hermaphroditism                 | 0.0                                            | 2.50                                          | [3]    | (2)     |
| RN0260    | 294975     | Phocomelia                           | 0.0                                            | 0.62                                          | [3]    | (3)     |
| RN0300    | 3027       | Caudal regression sequence           | 0.0                                            | 1.00                                          | [24]   | (4)     |
| RN0320    | 2368       | Gastroschisis                        | 1.2                                            | 23.70                                         | [3]    | (5)     |
| RN0350    | 192        | Coffin-Lowry syndrome                | 0.0                                            | 1.00                                          | [24]   |         |
| RN0390    | 380        | Greig cephalopolysyndactyly syndrome | 0.2                                            | 0.10                                          | [24]   |         |
| RN0430    | 2911       | Poland syndrome                      | 1.3                                            | 1.50                                          | [3]    |         |
| RN0440    | 3169       | Sirenomelia                          | 0.0                                            | 0.98                                          | [3]    | (6)     |
| RN0510    | 464        | Incontinentia pigmenti               | 0.8                                            | 1.20                                          | [3]    |         |
| RN0640    | 1114       | Aplasia cutis congenita              | 0.1                                            | 10.00                                         | [3]    |         |
| RN0660    | 870        | Down syndrome                        | 35.0                                           | 95.00                                         | [3]    |         |
| RN0670    | 281        | Cri du chat syndrome                 | 0.3                                            | 2.00                                          | [24]   |         |
| RN0680    | 881        | Turner syndrome                      | 2.0                                            | 5.50                                          | [3]    |         |
| RN0700    | 280        | Wolf-Hirschhorn syndrome             | 0.2                                            | 2.00                                          | [3]    | (7)     |
| RN0750    | 805        | Tuberous sclerosis                   | 2.8                                            | 10.00                                         | [3]    |         |
| RN0770    | 3205       | Sturge-Weber syndrome                | 0.7                                            | 3.50                                          | [3]    |         |
| RN0790    | 915        | Aarskog-Scott syndrome               | 0.1                                            | 0.50                                          | [3]    |         |
| RN0850    | 138        | CHARGE syndrome                      | 1.2                                            | 6.50                                          | [3]    |         |
| RN0860    | 3157       | De Morsier syndrome                  | 0.2                                            | 10.00                                         | [3]    | (8)     |
| RN0870    | 235        | Dubowitz syndrome                    | 0.0                                            | 0.20                                          | [3]    | (9)     |
| RN0880    | 1896       | EEC syndrome                         | 0.6                                            | 1.11                                          | [3]    |         |
| RN0900    | 2059       | Fryns syndrome                       | 0.1                                            | 7.00                                          | [3]    | (10)    |

|        |       |                                         |     |       |      |      |
|--------|-------|-----------------------------------------|-----|-------|------|------|
| RN0910 | 374   | Goldenhar syndrome                      | 1.7 | 2.90  | [3]  |      |
| RN0930 | 392   | Holt-Oram syndrome                      | 0.0 | 0.70  | [3]  | (11) |
|        |       | Primary ciliary dyskinesia, Kartagener  |     |       |      |      |
| RN0950 | 98861 | type                                    | 1.1 | 3.00  | [24] |      |
| RN1010 | 648   | Noonan syndrome                         | 2.5 | 40.00 | [24] | (12) |
| RN1080 | 813   | Silver-Russell syndrome                 | 0.2 | 0.70  | [3]  |      |
| RN1100 | 808   | Seckel syndrome                         | 0.0 | 0.20  | [3]  | (9)  |
| RN1170 | 744   | Proteus syndrome                        | 0.1 | 0.10  | [24] |      |
| RN1190 | 2614  | Nail-patella syndrome                   | 0.0 | 0.20  | [3]  | (9)  |
| RN1250 | 887   | VACTERL/VATER association               | 0.8 | 6.25  | [3]  |      |
| RN1270 | 904   | Williams syndrome                       | 1.5 | 10.80 | [3]  |      |
| RN1300 | 72    | Angelman syndrome                       | 0.2 | 1.30  | [3]  |      |
| RN1310 | 739   | Prader-Willi syndrome                   | 3.6 | 3.10  | [3]  |      |
| RN1330 | 908   | Fragile X syndrome                      | 0.4 | 2.40  | [3]  |      |
| RN1380 | 110   | Bardet-Biedl syndrome                   | 0.0 | 0.50  | [3]  |      |
| RN1400 | 191   | Cockayne syndrome                       | 0.0 | 0.20  | [3]  | (9)  |
| RN1410 | 199   | Cornelia de Lange syndrome              | 0.4 | 1.30  | [3]  |      |
|        |       |                                         |     |       |      |      |
| RN1450 | 94068 | Congenital spondyloepiphyseal dysplasia | 0.0 | 1.00  | [3]  | (13) |
| RN1460 | 2052  | Fraser syndrome                         | 0.1 | 0.20  | [3]  |      |
| RN1590 | 884   | Pallister-Killian syndrome              | 0.2 | 4.00  | [3]  | (14) |
| RN1620 | 783   | Rubinstein-Taybi syndrome               | 0.3 | 0.70  | [3]  |      |
| RN1730 | 893   | WAGR syndrome                           | 0.0 | 0.20  | [3]  | (9)  |
| RN1740 | 899   | Walker-Warburg syndrome                 | 0.0 | 1.65  | [3]  |      |
| RN1760 | 912   | Zellweger syndrome                      | 0.3 | 2.00  | [24] |      |
| RP0010 | 290   | Congenital rubella syndrome             | 1.5 | 0.35  | [3]  |      |
| RP0040 | 1915  | Fetal alcohol syndrome                  | 0.4 | 1.60  | [3]  |      |

## Comments

- (1) The average BP calculated from all EUROCAT full member registries in the period 2010-2014 is 0.17-0.23/100000 live births [39], in line with our estimate.
- (2) About 15% individuals are observed at birth with ambiguous genitalia [40]. They may be the only one reported to RNMR in the notification conditions selected for our estimates. Correcting the Orphanet reported value taking into consideration the fraction of cases symptomatic at birth, the resulting value (0.37) would justify the absence of findings in the observed newborn population.
- (3) Severe skeletal dysplasias are identified prenatally by ultrasound. Affected pregnancies are often terminated by choice and prevalence in live births is much lower than in total pregnancies. The ORPHANET reported value might have been referred to total pregnancies and not to livebirths.
- (4) Orphanet reported value is referred to pregnancies and not to live births. BP values in live births are lower than in pregnancies when the disease cause prenatal death or if termination of pregnancy by choice is possible.
- (5) The average 2010-2014 calculated from all EUROCAT full member registries is 2.26-2.27/100000 live births [39], in line with our estimate.

- (6) The Orphanet portal states that most cases are stillborn, or die during, or shortly after, birth [24]. It is possible that prenatal diagnosis results in termination of pregnancy by choice, so that prevalence in live births is much lower than in total pregnancies. The Orphanet reported value might have been referred to total pregnancies and not to livebirths.
- (7) A UK population-based study (1989-1998) found a BP of 1/95896, i.e. 1.04/100thousand [41].
- (8) A study in South-Eastern Hungary found a BP equal to 1.1/100thousand [42].
- (9) Due to the limited newborn population monitored in the whole observation period (about 1 million live new-borns all over Italy), the lack of observations can be considered justified by the published BP of 0.2/100000
- (10) At least some major malformations associated with the disease are noted during pregnancies. Survival beyond the neonatal period is uncommon [24]. It is possible that the ORPHANET reported value refers to total pregnancies and not to live births.
- (11) This syndrome showed regional variation in Europe in the range 0.2-2.4/100thousand births. Moreover, the 1990-2011 study showed a significant mean BP decrease from 1.1 to 0.4 between the first and second half observation period [43]. The lower values (range and mean) justify the lack of findings in the observed new-born population.
- (12) Noonan syndrome is often difficult to recognize in the newborn [44]. Therefore it is likely that the cases are not diagnosed in the notification conditions selected in our study.
- (13) A French study found a BP of 0,94/100thousands pregnancies [45]. Severe skeletal dysplasias are identified prenatally by ultrasound. Affected pregnancies are often terminated by choice [46] and prevalence in live births is much lower than in total pregnancies.
- (14) A UK population-based study found a BP of 0.51/100thousand in live births [47].

## References

- [3] ORPHANET. Prevalence and incidence of rare diseases: Bibliographic data Prevalence, incidence or number of published cases listed by diseases (in alphabetical order). ORPHANET Report Series N.1, June 2017. Available online: [http://www.orpha.net/orphacom/cahiers/docs/GB/Prevalence\\_of\\_rare\\_diseases\\_by\\_alphabetical\\_list.pdf](http://www.orpha.net/orphacom/cahiers/docs/GB/Prevalence_of_rare_diseases_by_alphabetical_list.pdf) (Accessed on 15 July 2017).
- [24] ORPHANET. Disease data sheets. Available online: [http://www.orpha.net/consor/cgi-bin/Disease\\_Search\\_Simple.php?lng=EN](http://www.orpha.net/consor/cgi-bin/Disease_Search_Simple.php?lng=EN) (Accessed on 3 April 2017).
- [39] EUROCAT. Prevalence Tables. Available on-line at: <http://www.eurocat-network.eu/accessprevalencedata/prevalencetables> (Accessed on 10 November 2017).
- [40] Zenteno-Ruiz J.C., Kofman-Alfaro S., Méndez J.P. 46,XX sex reversal. Arch Med Res 2001, 32, 559–566.
- [41] Shannon N.L., Maltby E.L., Rigby A.S., Quarrell O.W.J. An epidemiological study of Wolf-Hirschhorn syndrome: life expectancy and cause of mortality. J Med Genet 2001, 38, 674–679.

- [42] Szabó N.Z. Epidemiology of central nervous system malformations in South-Eastern Hungary. A Thesis for the Degree of Doctor of Philosophy, Department of Paediatrics, Faculty of Medicine, University of Szeged (2012) Available online at: [http://doktori.bibl.u-szeged.hu/1485/1/SZAB%C3%93\\_N%C3%93RA\\_PhD\\_ertekezes.pdf](http://doktori.bibl.u-szeged.hu/1485/1/SZAB%C3%93_N%C3%93RA_PhD_ertekezes.pdf) (Accessed 15 November 2017).
- [43] Barisic I., Boban L., Greenlees R., Garne E., Wellesley D., Calzolari E., Addor M.-C., Arriola L., Bergman J.E.H., Braz P., Budd J.L.S., Gatt M., Haeusler M., Khoshnood B., Klungsoyr K., McDonnell B., Nelen V., Pierini ., Queisser-Wahrendorf A., Rankin J., Rissmann A., Rounding C., Tucker D., Verellen-Dumoulin C., Dolk H. Holt Oram syndrome: a registry-based study in Europe. *Orphanet J Rare Dis* 2014, 9, 156 Available on-line at: <https://ojrd.biomedcentral.com/track/pdf/10.1186/s13023-014-0156-y?site=ojrd.biomedcentral.com> (Accessed November 2017)
- [44] Noonan J.A. Noonan syndrome revisited. *J Pediatr* 1999, 135, 667-668
- [45] Stoll, C., Dott, B., Roth, M.-P. and Alembik, Y. Birth prevalence rates of skeletal dysplasias. *Clin Genet*, 1989, 35, 88–92. doi:10.1111/j.1399-0004.1989.tb02912.x
- [46] Holmes L.B. Common Malformations. Oxford University Press (UK) 2012, p. 277-283.
- [47] Blyth, M., Maloney, V., Beal, S., Collinson, M., Huang, S., Crolla, J., Temple, I. K., Baralle, D. Pallister-Killian syndrome: a study of 22 British patients. *J Med Genet* 2015, 52, 454-464,
