# Supplementary material for: The Occurrence of 275 Rare Diseases and 47 Rare Disease Groups in Italy. Results from the National Registry of Rare Diseases
Source: MDPI journal article supplement (doi:10.3390/ijerph15071470), 2018-07-12
Supplement: s1 [file s1]

**Table S7. Incidence of rare diseases notified to RNMR during 2012-2014**

**Record source:** Subset 1; **Notifying regions:** AD and CD Regions; **Record selection:** Records with date of diagnosis ascertainment or certification in the period 2012-2014; **Total records:** 63162.

**Note:** Records are grouped by exemption code, i.e.: diseases identified with group codes are collectively reported with the group denomination.

*ad* : value based on AD notifications

*cd* : value based on CD notifications

*m* : value based on both notifications

|           |            |                                       | Average population in the period 2012-2014 (million) |          |               |           |            |           |        |                       |         |                |
|-----------|------------|---------------------------------------|------------------------------------------------------|----------|---------------|-----------|------------|-----------|--------|-----------------------|---------|----------------|
|           |            |                                       | 60.421                                               | 4.412    | 0.128         | 9.924     | 0.515      | 0.435     | 4.912  | 1.226                 | 1.580   | 4.425          |
| RNMR Code | ORPHA Code | Region<br>Disease or Disease group    | Italy                                                | Piemonte | Valle d'Aosta | Lombardia | PA Bolzano | PA Trento | Veneto | Friuli-Venezia Giulia | Liguria | Emilia-Romagna |
| RA0010    | 548        | Hansen disease (Leprosy)              | 0.03cd                                               | 0        | 0             | 0         | 0          | 0         | 0.07cd | 0                     | 0.63cd  | 0              |
| RA0020    | 3452       | Whipple disease                       | 0.09m                                                | 0.23ad   | 0             | 0.07ad    | 0.65cd     | 0.77cd    | 0.14cd | 0                     | 0       | 0.15cd         |
| RA0030    | 91546      | Lyme disease                          | 0.33m                                                |          | 0             |           | 0          | 0.77cd    | 0.2cd  | 8.43cd                | 0.42cd  | 0.15cd         |
| RB0010    | 654        | Wilms tumor                           | 0.66m                                                | 0.15ad   | 0             | 0.03ad    | 0          | 1.53cd    | 1.02cd | 0.27cd                | 0       | 0.08cd         |
| RB0020    | 790        | Retinoblastoma                        | 0.83m                                                | 0.53ad   | 2.6ad         | 0.67ad    | 0          | 1.53ad    |        |                       |         | 0.68ad         |
| RB0040    | 79665      | Gardner syndrome                      | 0.03m                                                | 0        | 0             | 0         | 0          | 0         | 0      | 0                     | 0       | 0              |
| RB0050    | 733        | Familial adenomatous polyposis        | 1.9m                                                 | 0.91ad   | 0             | 0.2cd     | 4.53cd     | 0.77cd    | 1.7cd  | 5.44cd                | 2.95cd  | 3.24cd         |
| RB0060    | 538        | Lymphangioma                          | 0.34m                                                | 0.38ad   | 0             |           | 0.65cd     |           | 0.27cd | 0.27cd                | 0.63cd  |                |
| RC0010    | 199296     | Congenital isolated ACTH deficiency   | 0.28m                                                |          | 0             |           | 0          | 0.77cd    | 0.27cd | 0.27cd                | 0       | 0.9cd          |
| RC0020    | 478        | Kallmann syndrome                     | 0.94m                                                | 1.13ad   | 0             |           | 3.24cd     | 2.3cd     |        |                       | 0.42cd  | 1.51cd         |
| RC0030    |            | Reifenstein syndrome                  | 0.04m                                                | 0        | 0             | 0         | 0          | 0         | 0      | 0                     | 0       | 0              |
| RC0040    | 169615     | Idiopathic central precocious puberty | 7.33m                                                | 3.25ad   | 2.6ad         |           | 6.48cd     | 15.34cd   | 11.6cd | 5.71cd                |         | 19.51cd        |

|        |        |                                                   |        |         |        |         |         |         |         |         |         |         |
|--------|--------|---------------------------------------------------|--------|---------|--------|---------|---------|---------|---------|---------|---------|---------|
| RC0050 | 508    | Leprechaunism                                     | 0.01ad | 0       | 0      | 0       | 0       | 0       | 0       | 0       | 0       | 0       |
| RC0060 | 902    | Werner syndrome                                   | 0.02m  | 0       | 0      | 0       | 0       | 0       | 0.14cd  | 0       | 0.21cd  | 0       |
| RC0080 |        | Total lipodystrophy                               | 0.1m   | 0.08ad  | 0      | 0.07cd  | 0       | 0       | 0.07cd  | 0       | 0       | 0.3cd   |
| RC0090 | 36397  | Dercum disease                                    | 0.09m  | 0ad     | 2.6ad  | 0       | 0       | 0       | 0       | 0       |         | 0.23cd  |
| RC0100 | 333    | Farber Disease                                    | 0.01m  | 0       | 0      | 0.03ad  | 0       | 0       | 0       | 0       | 0       | 0       |
| RC0110 |        | Mixed cryoglobulinemia                            | 1.75m  | 0.83ad  | 0      | 1.91ad  | 0       | 0       | 1.49cd  | 11.42cd |         | 1.96cd  |
| RC0120 | 48818  | Aceruloplasminemia                                | 0.01ad | 0       | 0      | 0.03ad  | 0       | 0       | 0       | 0       | 0       | 0       |
| RC0150 | 905    | Wilson disease                                    | 0.7m   | 0.6ad   | 2.6ad  |         | 1.3cd   | 1.53cd  | 0.88cd  | 0.54cd  | 0.63cd  | 0.6cd   |
| RC0160 | 436    | Hypophosphatasia                                  | 0.02m  | 0.08ad  | 0      | 0       | 0       | 0       | 0       | 0       | 0       | 0       |
| RC0170 |        | Vitamin D-resistant hypophosphatemia              | 0.45m  | 0.38ad  | 0      |         | 0       | 0       |         | 0       | 0       | 0.45cd  |
| RC0180 | 205    | Crigler-Najjar syndrome                           | 0.08m  | 0       | 0      | 0.07ad  | 0.65ad  | 0       | 0       | 0       | 0.21cd  |         |
| RC0190 | 91378  | Hereditary angioedema                             | 0.81m  | 0.6ad   | 0      | 0       | 5.18cd  | 0       | 1.7cd   |         | 1.48cd  | 0.15cd  |
| RC0200 | 60     | Congenital alpha-1-antitrypsin deficiency         | 0.61m  | 0.38ad  | 0      | 0.47ad  | 17.49cd | 2.3cd   | 1.36cd  |         |         |         |
| RC0210 | 117    | Behçet disease                                    | 4.57m  | 4.16ad  | 0      |         |         | 9.21cd  | 6.45cd  | 13.59cd |         |         |
| RD0010 |        | Hemolytic-uremic syndrome                         | 0.53m  | 0.45ad  | 0      | 0.87ad  | 0       | 0       | 1.02cd  | 0.54cd  | 0.21ad  |         |
| RD0020 | 447    | Paroxysmal nocturnal hemoglobinuria               | 0.24m  | 0.38ad  | 0      | 0.24ad  | 0       | 0       |         | 0       | 0       | 0.53cd  |
| RD0030 | 761    | Henoch-Schönlein purpura                          | 1.35m  | 1.51ad  | 0      |         | 0       | 0.77cd  | 1.02cd  | 1.63cd  | 0.42cd  | 1.58cd  |
| RD0040 | 2686   | Cyclic neutropenia                                | 0.13m  |         | 0      | 0.03cd  | 0       | 0.77cd  | 0.14cd  | 0       | 0.42cd  | 0.08cd  |
| RD0050 | 379    | Chronic granulomatous disease                     | 0.19m  | 0       | 0      | 0.1ad   | 0       | 0       | 0.07ad  | 0.27cd  | 0       | 0       |
| RF0010 | 726    | Alpers syndrome                                   | 0.04m  | 0.08ad  | 0      | 0.03ad  | 0       | 0       | 0       | 0.27cd  | 0       | 0.23cd  |
| RF0020 | 480    | Kearns-Sayre syndrome                             | 0.31m  | 0.08ad  | 0      |         | 0       | 0       |         | 0       |         | 0.68cd  |
| RF0030 | 506    | Leigh syndrome                                    | 0.25m  | 0.08ad  | 0      | 0.44ad  | 0       | 0       | 0.2cd   | 0.54cd  |         | 0.68cd  |
| RF0040 | 778    | Rett syndrome                                     | 0.53m  | 0.3ad   | 0      | 0.64ad  | 1.3cd   |         |         | 0       | 0.42cd  |         |
| RF0050 | 101    | Dentatorubral pallidoluysian atrophy              | 0.01ad | 0       | 0      | 0       | 0       | 0       | 0       | 0       | 0       | 0       |
| RF0060 | 98261  | Progressive myoclonic epilepsy                    | 0.21m  | 0.38ad  | 0      | 0       | 0       | 0       | 0.07cd  | 0.27cd  | 1.69cd  | 0.08ad  |
| RF0070 | 36899  | Myoclonus-dystonia syndrome                       | 0.02m  | 0.23ad  | 0      | 0       | 0       | 0       | 0       | 0       | 0.21cd  | 0       |
| RF0080 | 399    | Huntington disease                                | 3.38m  | 2.64ad  | 5.2ad  | 1.48ad  | 5.18cd  | 4.6cd   | 2.44cd  | 4.08cd  |         | 3.16cd  |
| RF0090 |        | Idiopathic torsion dystonia                       | 1.46m  | 0.98ad  | 0      | 0.4ad   | 0.65cd  | 0       | 2.44cd  | 0.82cd  | 1.05cd  | 1.96cd  |
| RF0100 | 803    | Amyotrophic lateral sclerosis                     | 19.15m | 23.72ad | 10.4ad | 15.01ad | 20.73cd | 39.13cd | 29.99cd | 22.02cd | 41.77cd | 29.91cd |
| RF0110 | 35689  | Primary lateral sclerosis                         | 0.56m  | 1.28ad  | 0      | 0.44ad  | 0       | 0.77ad  | 0.41cd  | 0.54cd  | 0.84cd  |         |
| RF0120 |        | Adrenoleukodystrophy                              | 0.2m   | 0.15ad  | 0      | 0.2ad   | 0       | 0.77cd  | 0.27cd  | 0.27cd  | 0       | 0.15ad  |
| RF0130 | 2382   | Lennox-Gastaut syndrome                           | 0.59m  |         | 2.6cd  |         | 1.3cd   | 0.77cd  | 0.48cd  | 0       | 1.27cd  | 3.01cd  |
| RF0140 | 3451   | West syndrome                                     | 0.7m   | 0       | 0      | 0.3ad   | 0       | 0       | 0.41cd  | 1.36cd  | 1.69cd  | 0.75cd  |
| RF0150 | 2073   | Narcolepsy                                        | 0.97m  |         | 0      |         | 1.3cd   | 0.77cd  | 0.95cd  | 1.36cd  |         | 2.49cd  |
| RF0160 | 2483   | Melkersson-Rosenthal syndrome                     | 0.05m  | 0       | 0      | 0       | 0.65cd  | 0       | 0       | 0       | 0.42cd  | 0.08cd  |
| RF0170 | 240071 | Steele-Richardson-Olszewski disease               | 0.63m  | 0.68ad  | 0      | 0.74ad  | 0.65cd  | 0       | 0.95cd  | 0       | 0.84cd  | 0.23cd  |
| RF0180 | 2932   | Chronic inflammatory demyelinating polyneuropathy | 3.77m  | 5.29ad  | 2.6cd  | 3.29ad  | 3.24cd  | 2.3cd   | 6.65cd  | 1.09cd  | 7.17cd  | 11cd    |

|        |        |                                       |        |         |       |        |          |         |         |         |         |         |
|--------|--------|---------------------------------------|--------|---------|-------|--------|----------|---------|---------|---------|---------|---------|
| RF0190 | 43393  | Lambert-Eaton syndrome                | 0.13m  | 0       | 0     |        | 0        | 0       | 0.14cd  | 0       |         | 0.38cd  |
| RF0200 | 891    | Familial exudative vitreoretinopathy  | 0.31m  |         | 0     |        | 0.65cd   |         |         | 0.54cd  | 0       |         |
| RF0210 | 40923  | Eales disease                         | 0.03m  | 0       | 0     | 0      | 0        | 0       | 0.07cd  | 0       | 0       | 0       |
| RF0230 | 263479 | Fuchs heterochromic iridocyclitis     | 0.34m  | 0.08ad  | 0     | 0.1ad  | 0        | 0.77cd  | 0.75cd  | 0.54cd  | 0       | 0.23cd  |
| RF0240 | 98981  | Essential iris atrophy                | 0.01m  | 0       | 0     | 0.03ad | 0        | 0       | 0       | 0       | 0       | 0       |
| RF0250 | 215    | Congenital stationary night blindness | 0.01cd | 0       | 0     | 0      | 0        | 0       | 0       | 0       | 0       | 0       |
| RF0270 | 1467   | Cogan syndrome                        | 0.16m  | 0.08ad  | 0     | 0.1cd  | 0.65cd   | 0.77cd  | 0.07cd  | 0.54cd  | 0.21cd  | 0.68cd  |
| RF0280 | 156071 | Keratoconus                           | 25.53m | 11.86ad |       | 8.13ad | 174.89cd | 58.3cd  | 61.62cd | 14.68cd | 17.09cd | 36.99cd |
| RF0290 | 97231  | Ligneous conjunctivitis               | 0.01ad | 0       | 0     | 0      | 0        | 0       | 0       | 0       | 0       | 0       |
| RF0300 | 104    | Leber hereditary optic neuropathy     | 0.79m  |         | 0     |        | 0        | 0       | 1.09cd  | 1.63cd  | 0.21cd  |         |
| RG0010 |        | Rheumatic endocarditis                | 1.36m  | 1.13ad  | 0     | 0.27ad | 0        | 4.6cd   | 0.68cd  | 0.27cd  | 1.05cd  | 2.86cd  |
| RG0020 | 727    | Microscopic polyangiitis              | 1.14m  | 2.8ad   | 0     | 1.18ad | 0.65cd   | 0.77cd  | 0.41cd  | 3.26cd  | 3.59cd  | 2.03cd  |
| RG0030 | 767    | Polyarteritis nodosa                  | 0.41m  | 0.45ad  | 0     |        | 0.65cd   | 0       | 0.54cd  | 1.36cd  | 1.27cd  | 0.9cd   |
| RG0040 | 2331   | Kawasaki disease                      | 2.08m  | 1.44ad  | 0     | 1.55ad | 1.3cd    | 1.53cd  | 3.73cd  | 2.17cd  | 1.05cd  | 2.94cd  |
| RG0050 | 183    | Churg-Strauss syndrome                | 1.88m  | 1.89ad  | 0     | 1.48ad | 5.83cd   | 1.53cd  | 2.92cd  | 3.26cd  |         | 3.24cd  |
| RG0060 | 375    | Goodpasture syndrome                  | 0.04m  | 0.15ad  | 0     | 0.03ad | 0        | 0       | 0       | 0       | 0       | 0       |
| RG0070 | 900    | Wegener granulomatosis                | 1.77m  |         | 0     | 0.97ad | 9.07cd   | 9.97cd  | 2.92cd  | 7.61cd  |         | 3.62cd  |
| RG0080 | 397    | Giant cell arteritis                  | 3.73m  | 7.63ad  | 0     | 4.4ad  | 7.77cd   | 9.21cd  | 3.53cd  | 17.4cd  |         | 7.61cd  |
| RG0090 | 3287   | Takayasu arteritis                    | 0.63m  | 0.98ad  | 0     |        | 1.3cd    | 0.77cd  | 0.75cd  | 0.54cd  | 0.84cd  | 1.81cd  |
| RG0100 | 774    | Hereditary hemorrhagic telangiectasia | 2.36m  | 1.06ad  | 0     |        | 1.94cd   |         |         |         |         |         |
| RG0110 | 131    | Budd-Chiari syndrome                  | 0.13m  | 0       | 0     | 0.03ad | 0        | 0.77ad  | 0.27cd  | 0       | 0       | 0.23cd  |
| RI0010 | 930    | Idiopathic achalasia                  | 4.63m  | 1.81ad  | 0     |        |          | 3.07cd  | 6.72cd  | 2.72cd  |         | 7.01cd  |
| RI0030 | 2070   | Eosinophilic gastroenteritis          | 0.55m  | 1.36ad  | 0     | 0.71ad | 0        | 1.53cd  | 0.48cd  | 2.45cd  | 0.63cd  | 1.21cd  |
| RI0040 |        | Chronic intestinal pseudoobstruction  | 0.23m  | 0.53ad  | 0     |        | 0        | 0       | 0.54cd  | 0.54cd  | 0       | 0.3cd   |
| RI0050 | 171    | Primary sclerosing cholangitis        | 1.03m  | 1.44ad  | 2.6ad |        | 3.89cd   | 0.77cd  | 1.97cd  | 2.99cd  |         | 2.56cd  |
| RI0070 | 2290   | Microvillus inclusion disease (MVID)  | 0.02m  | 0.08ad  | 0     | 0      | 0        | 0       | 0       | 0       | 0       | 0.08cd  |
| RI0080 | 36204  | Intestinal lymphangiectasia           | 0.07m  | 0.15ad  | 0     | 0      | 0.65cd   | 0.77cd  | 0.07cd  | 0       | 0       | 0.15cd  |
| RJ0010 | 223    | Nephrogenic diabetes insipidus        | 0.07m  | 0       | 0     | 0      | 0        | 0       | 0.34cd  | 0       | 0       | 0.08cd  |
| RJ0020 | 49041  | Retroperitoneal fibrosis              | 0.72m  | 1.74ad  | 0     |        | 2.59cd   | 2.3cd   | 0.68cd  | 1.9cd   | 1.05cd  | 0.9cd   |
| RJ0030 | 37202  | Interstitial cystitis                 | 3.19m  | 1.36ad  | 0     | 1.44ad | 1.94cd   |         | 2.99cd  |         |         |         |
| RL0020 | 1656   | Dermatitis herpetiformis              | 0.66m  | 0.91ad  | 0     | 0.4ad  | 1.3cd    | 5.37cd  | 1.36cd  | 2.45cd  | 1.48cd  | 1.28cd  |
| RL0030 |        | Pemphigus vulgaris                    | 3.75m  | 4.46ad  | 2.6ad | 2.45ad | 2.59cd   | 4.6cd   | 4cd     | 7.07cd  | 7.38cd  | 6.03cd  |
| RL0040 |        | Bullous pemphigoid                    | 4.88m  | 6.88ad  | 0     | 4.53ad | 8.42cd   | 3.84cd  | 7.46cd  | 14.68cd | 4.64cd  | 7.53cd  |
| RL0050 | 46486  | Mucous membrane pemphigoid            | 0.68m  |         | 0     |        | 0        | 1.53cd  |         | 4.08cd  | 2.74cd  | 0.9cd   |
| RL0060 |        | Lichen sclerosus                      | 5.92m  | 9.52ad  | 2.6cd |        | 5.18cd   | 30.69cd | 4.34cd  | 5.71cd  | 14.56cd | 18.76cd |
| RM0010 | 221    | Dermatomyositis                       | 1.87m  | 1.44ad  | 0     |        | 5.83cd   | 6.14cd  | 2.92cd  | 3.81cd  | 2.32cd  | 4.14cd  |
| RM0020 | 732    | Polymyositis                          | 1.95m  | 1.59ad  | 0     |        | 2.59cd   | 3.07cd  | 2.99cd  | 7.07cd  | 2.74cd  | 3.47cd  |

|        |        |                                                              |        |        |       |        |        |        |        |        |        |        |
|--------|--------|--------------------------------------------------------------|--------|--------|-------|--------|--------|--------|--------|--------|--------|--------|
| RM0030 | 809    | Mixed connective tissue disease                              | 1.8m   | 2.04ad | 2.6ad | 1.34ad | 4.53cd | 0      | 2.04cd | 2.72cd | 4.43cd | 2.34cd |
| RM0040 | 3165   | Eosinophilic fasciitis                                       | 0.2m   | 0.45ad | 0     | 0.07ad | 0      | 0.77cd | 0.34cd | 0.27cd |        | 0.08cd |
| RM0050 |        | Diffuse fasciitis                                            | 0.03m  | 0      | 0     | 0.03ad | 0      | 0      | 0      | 0      | 0      | 0      |
| RM0060 | 728    | Relapsing polychondritis                                     | 0.18m  | 0.08ad | 0     |        | 0.65cd | 0.77cd | 0.41cd | 0.27cd | 0.42cd | 0      |
| RN0010 |        | Arnold-Chiari malformation                                   | 4.19m  | 7.48ad | 0     | 2.86ad | 5.83cd | 8.44cd | 8.96cd | 4.62cd | 8.65cd | 4.97cd |
| RN0020 | 199642 | Microcephaly                                                 | 0.35m  | 0.08cd | 0     | 0.07ad | 1.3cd  | 0.77cd | 0.14cd | 0      | 0      | 0.38cd |
| RN0030 |        | Cerebellar agenesis                                          | 0.04m  | 0      | 0     | 0.03ad | 0      | 0      | 0.07cd | 0.27cd | 0      | 0.08cd |
| RN0040 | 475    | Joubert syndrome                                             | 0.15m  | 0.08ad | 0     | 0.17ad | 0.65cd | 0      | 0.34cd | 0.27cd | 0.21cd | 0      |
| RN0050 |        | Lissencephaly                                                | 0.18m  |        | 0     | 0.1ad  | 0.65cd | 0      | 0.2cd  | 0      | 0      |        |
| RN0060 | 2162   | Holoprosencephaly                                            | 0.08m  | 0.15ad | 0     | 0      | 0      | 1.53cd | 0      | 0      | 0      | 0      |
| RN0080 | 1764   | Familial dysautonomia                                        | 0.03m  | 0      | 0     | 0      | 0.65cd | 0      | 0      | 0      | 0      | 0      |
| RN0090 |        | Axenfeld-Rieger anomaly                                      | 0.04m  | 0.08ad | 0     | 0.07ad | 0      | 0      | 0.2cd  | 0      | 0      | 0      |
| RN0100 | 708    | Peters anomaly                                               | 0.02m  | 0      | 0     | 0      | 0      | 0      | 0.14cd | 0      | 0      | 0.08cd |
| RN0110 | 77     | Aniridia                                                     | 0.11m  | 0.08ad | 0     | 0.03ad | 0      | 0      | 0.14cd | 0.27cd | 0      | 0.3cd  |
| RN0120 |        | Congenital colobomatous optic disc                           | 0.31m  | 0.15ad | 0     |        | 1.3cd  | 2.3cd  |        | 0      | 0.84cd |        |
| RN0130 | 35737  | Morning glory syndrome                                       | 0.02m  | 0      | 0     | 0.03ad | 0      | 0      | 0      | 0      | 0      | 0      |
| RN0140 |        | Pupillar membrane persistence                                | 0.01cd | 0      | 0     | 0      | 0      | 0      | 0      | 0      | 0      | 0.08cd |
| RN0150 | 1059   | Blue rubber bleb nevus                                       | 0.02m  | 0      | 0     | 0.03ad | 0      | 0      | 0      | 0      | 0      | 0      |
| RN0160 |        | Esophageal atresia and/or Isolated tracheoesophageal fistula | 0.66m  | 1.21ad | 2.6ad |        | 0      | 0      | 1.63cd | 1.63cd | 1.9cd  | 0.9cd  |
| RN0170 | 1201   | Atresia of small intestine                                   | 0.18m  | 0.68ad | 0     | 0.03ad | 0      | 0.77cd | 0.27cd | 0.54cd | 0.84cd | 0.15cd |
| RN0180 | 1203   | Duodenal atresia                                             | 0.16m  | 0.83ad | 0     | 0.13ad | 0      | 0      | 0.14cd | 0      | 0.42cd | 0.45cd |
| RN0190 | 96346  | Anorectal malformation                                       | 0.93m  | 1.28ad | 2.6ad |        | 2.59cd | 5.37cd | 2.58cd | 1.36cd | 3.8cd  | 1.73cd |
| RN0200 | 388    | Hirschsprung disease                                         | 0.88m  |        | 2.6cd |        | 1.3cd  | 3.07cd | 1.36cd | 1.63cd | 2.74cd | 1.43cd |
| RN0210 |        | Biliary atresia                                              | 0.44m  | 0.15ad | 0     | 0.24ad | 0      | 0      | 0.68cd | 1.63cd | 1.05cd |        |
| RN0220 | 53035  | Caroli disease                                               | 0.13m  | 0.15ad | 0     | 0.1ad  | 0      | 0      | 0.34cd | 0      | 0.42cd | 0.08cd |
| RN0230 | 2924   | Polycystic liver disease                                     | 0.42m  | 2.12ad | 0     | 0.3ad  | 3.24cd | 0.77cd | 1.22cd | 0      | 0      | 0.23cd |
| RN0240 | 2138   | True hermaphroditism                                         | 0.01ad | 0.08ad | 0     | 0      | 0      | 0      | 0      | 0      | 0      | 0      |
| RN0250 | 1309   | Medullary sponge kidney                                      | 0.3m   | 1.06ad | 0     | 0.34ad | 0      | 0.77cd | 0.54cd |        | 0.21cd | 0.53cd |
| RN0260 | 294975 | Phocomelia                                                   | 0.06cd | 0.15cd | 0     | 0.03cd | 0      | 0      | 0      | 0      | 0.21cd | 0      |
| RN0270 | 3181   | Sprengel deformity                                           | 0.02cd | 0      | 0     | 0      | 0      | 0      | 0.14cd | 0      | 0      | 0      |
| RN0280 | 950    | Acrodyostosis                                                | 0.01ad | 0      | 0     | 0      | 0      | 0      | 0      | 0      | 0      | 0      |
| RN0290 |        | Camptodactyly                                                | 0.02m  | 0      | 0     | 0      | 0      | 0      | 0.07cd | 0      | 0      | 0.08cd |
| RN0300 | 3027   | Caudal regression sequence                                   | 0.09m  | 0.15cd | 0     | 0.07cd | 0      | 0      | 0.07cd | 0      | 0.42cd | 0.08cd |
| RN0310 | 2345   | Isolated Klippel-Feil syndrome                               | 0.17m  | 0.53ad | 0     |        | 0.65cd | 0.77cd | 0.14cd | 0.54cd | 0      | 0.3cd  |
| RN0320 | 2368   | Gastroschisis                                                | 0.13m  | 0      | 0     |        | 0      | 0      | 0.2cd  | 0.27cd | 0.42cd | 0.3cd  |
| RN0330 | 98249  | Ehlers-Danlos syndrome                                       | 2.43m  | 0.76ad | 0     | 4.03ad | 3.24cd | 0.77ad |        |        | 1.27cd |        |
| RN0340 | 974    | Adams-Oliver syndrome                                        | 0.03m  | 0      | 0     | 0.03ad | 0      | 0      | 0.07cd | 0      | 0      | 0      |

|        |      |                                            |        |        |       |        |         |        |        |        |        |        |
|--------|------|--------------------------------------------|--------|--------|-------|--------|---------|--------|--------|--------|--------|--------|
| RN0350 | 192  | Coffin-Lowry syndrome                      | 0.02m  | 0      | 0     | 0.03ad | 0.65cd  | 0      | 0      | 0      | 0      | 0      |
| RN0360 | 1465 | Coffin-Siris syndrome                      | 0.06m  | 0      | 0     | 0      | 0       | 0      | 0      | 0      | 0      | 0      |
| RN0370 | 239  | Dyggve-Melchior-Clausen disease            | 0.01m  | 0      | 0     | 0.03ad | 0       | 0      | 0      | 0      | 0      | 0      |
| RN0380 | 3255 | Filippi syndrome                           | 0.01ad | 0      | 0     | 0      | 0       | 0      | 0      | 0      | 0      | 0      |
| RN0390 | 380  | Greig cephalopolysyndactyly syndrome       | 0.03m  | 0      | 0     | 0      | 0       | 0      | 0.14cd | 0      | 0.21cd | 0      |
| RN0400 | 1540 | Jackson-Weiss syndrome                     | 0.02m  | 0      | 0     | 0      | 0       | 0      | 0.07ad | 0      | 0      | 0      |
| RN0410 | 2311 | Jarcho-Levin syndrome                      | 0.03m  | 0.08cd | 0     | 0      | 0       | 0      | 0      | 0      | 0      | 0      |
| RN0430 | 2911 | Poland syndrome                            | 1.14m  |        | 0     |        | 0       | 0.77cd | 1.09cd | 1.9cd  | 3.38cd | 1.51cd |
| RN0470 | 669  | Otopalatodigital syndrome                  | 0.02m  | 0      | 0     | 0      | 0       | 0      | 0      | 0      | 0      | 0      |
| RN0480 | 3377 | Trismus-pseudocamptodactyly                | 0.01cd | 0      | 0     | 0      | 0       | 0      | 0      | 0.27cd | 0      | 0      |
| RN0500 |      | Cutis laxa                                 | 0.01m  | 0      | 0     | 0      | 0       | 0      | 0.07cd | 0      | 0      | 0      |
| RN0510 | 464  | Incontinentia pigmenti                     | 0.12m  | 0.23ad | 0     | 0      | 0       | 0      | 0.14cd | 0      | 0      | 0.68cd |
| RN0520 | 910  | Xeroderma pigmentosum                      | 0.04m  | 0      | 0     | 0.03ad | 0       | 0      | 0.07cd | 0      | 0      | 0.08cd |
| RN0530 |      | Keratosis follicularis spinulosa decalvans | 0.01ad | 0      | 0     | 0      | 0       | 0      | 0      | 0      | 0      | 0      |
| RN0540 | 1556 | Cutis marmorata telangiectatica congenita  | 0.06m  | 0.08ad | 0     | 0      | 0.65cd  | 0      | 0.2cd  | 0      | 0      |        |
| RN0550 | 218  | Darier disease                             | 0.63m  | 0.98ad | 0     |        | 0.65cd  | 3.84cd | 0.95cd | 1.36cd | 0.42cd | 1.51cd |
| RN0560 | 1775 | Dyskeratosis congenita                     | 0.02ad | 0.08ad | 0     | 0      | 0       | 0      | 0      | 0      | 0      | 0      |
| RN0570 |      | Epidermolysis bullosa                      | 0.55m  | 0.3ad  | 0     | 0.03ad | 0.65cd  | 1.53cd | 0.48cd | 1.36cd | 0.63cd | 0.6cd  |
| RN0580 | 316  | Progressive symmetric erythrokeratoderma   | 0.01m  | 0      | 0     | 0      | 0       | 0      | 0      | 0.27cd | 0      | 0      |
| RN0590 | 317  | Erythrokeratoderma variabilis              | 0.02m  | 0.08ad | 0     | 0      | 0       | 0      | 0      | 0      | 0      | 0.15cd |
| RN0600 | 312  | Epidermolytic ichthyosis                   | 0.06m  | 0      | 0     | 0      | 0       | 0      | 0.07cd | 0      | 0      | 0.08cd |
| RN0610 | 2092 | Focal dermal hypoplasia                    | 0.03m  | 0      | 0     | 0      | 0       | 0      | 0      | 0      | 0.42cd | 0.08cd |
| RN0620 | 2796 | Pachydermoperiostosis                      | 0.02cd | 0      | 0     | 0      | 0       | 0      | 0      | 0.27cd | 0      | 0      |
| RN0630 | 758  | Pseudoxanthoma elasticum                   | 0.36m  | 0.15ad | 0     | 0.03ad | 1.94cd  | 2.3cd  | 0.75cd | 0      |        | 0.6cd  |
| RN0640 | 1114 | Aplasia cutis congenita                    | 0.02m  | 0      | 0     | 0      | 0       | 0      | 0      | 0      | 0      | 0.08cd |
| RN0650 | 1214 | Parry-Romberg syndrome                     | 0.13m  | 0.15ad | 0     | 0.07cd | 0       | 0      | 0.61cd | 0.27cd | 0      | 0      |
| RN0660 | 870  | Down syndrome                              | 7.76m  | 4.23ad | 0     |        | 24.61cd | 6.9cd  | 6.58cd | 2.17cd | 3.8cd  | 1.88cd |
| RN0670 | 281  | Cri du chat syndrome                       | 0.15m  | 0      | 0     | 0.07ad | 0       | 0      | 0.27cd | 0      | 0.42cd | 0.15cd |
| RN0680 | 881  | Turner syndrome                            | 2.53m  | 1.89ad | 2.6ad |        | 2.59cd  | 3.07cd | 1.97cd | 1.9cd  | 5.91cd | 1.88cd |
| RN0690 |      | Klinefelter syndrome                       | 3.75m  | 2.87ad | 0     |        | 7.77cd  | 6.9cd  | 6.38cd | 4.08cd | 3.8cd  | 8.66cd |
| RN0700 | 280  | Wolf-Hirschhorn syndrome                   | 0.13m  | 0      | 0     |        | 0       | 0.77cd | 0      | 0      | 0.21cd | 0.15cd |
| RN0710 | 550  | MELAS                                      | 0.73m  | 0.83ad | 0     | 0.57ad | 0       | 0.77cd |        | 0.54cd |        |        |
| RN0720 | 551  | MERRF                                      | 0.12m  | 0.08ad | 0     | 0.3ad  | 0       | 0      | 0      | 0      | 0      |        |
| RN0740 |      | Ivemark syndrome                           | 0.03cd | 0      | 0     | 0      | 0       | 0      | 0.27cd | 0      | 0      | 0      |
| RN0750 | 805  | Tuberous sclerosis                         | 1.18m  | 0.83ad | 0     | 0.4ad  | 1.3cd   | 1.53cd | 1.22cd | 1.36cd | 1.9cd  | 1.58cd |
| RN0760 | 2869 | Peutz-Jeghers syndrome                     | 0.2m   | 0.08ad | 0     | 0.07ad | 1.3cd   | 0      | 0.61cd | 0.27cd | 0.63cd | 0      |
| RN0770 | 3205 | Sturge-Weber syndrome                      | 0.16m  |        | 0     | 0      | 0       | 0      | 0.27cd | 0.54cd | 0.42cd | 0.23cd |

|        |        |                                        |        |        |       |        |        |        |        |        |        |        |
|--------|--------|----------------------------------------|--------|--------|-------|--------|--------|--------|--------|--------|--------|--------|
| RN0780 | 892    | Von Hippel-Lindau disease              | 0.22m  | 0.15ad | 0     |        | 0.65cd | 0.77cd | 0.14cd | 0      | 0.42cd | 0.15cd |
| RN0790 | 915    | Aarskog-Scott syndrome                 | 0.09m  | 0.08ad | 0     | 0.03ad | 0      | 0      | 0.07cd | 0.27cd | 0      | 0.08cd |
| RN0800 | 83     | Antley-Bixler syndrome                 | 0.01ad | 0      | 0     | 0      | 0      | 0      | 0      | 0      | 0      | 0      |
| RN0810 | 1225   | Baller-Gerold syndrome                 | 0.01ad | 0      | 0     | 0      | 0      | 0      | 0      | 0      | 0      | 0      |
| RN0820 | 116?   | Beckwith-Wiedemann syndrome            | 0.76m  | 0.91ad | 0     |        | 1.3cd  | 0.77cd | 0.88cd | 0.82cd | 0.21cd | 0.45cd |
| RN0830 | 125    | Bloom syndrome                         | 0.01cd | 0      | 0     | 0      | 0      | 0      | 0      | 0      | 0      | 0      |
| RN0850 | 138    | CHARGE syndrome                        | 0.35m  | 0.15ad | 0     |        | 0.65cd | 0.77cd | 0.54cd |        | 0.42cd | 0.6cd  |
| RN0860 | 3157   | De Morsier syndrome                    | 0.13m  | 0.53ad | 0     | 0.03ad | 1.3cd  | 0      | 0.14cd | 0      | 0.42cd | 0.08cd |
| RN0870 | 235    | Dubowitz syndrome                      | 0.03cd | 0      | 0     | 0      | 0      | 0      | 0.07cd | 0      | 0      | 0      |
| RN0880 | 1896   | EEC syndrome                           | 0.37m  | 0.53ad | 2.6ad |        | 1.3cd  | 2.3cd  | 0.75cd | 0      | 0      | 0.68cd |
| RN0890 | 2053   | Freeman-Sheldon syndrome               | 0.03m  | 0      | 0     | 0      | 0      | 0      | 0.2cd  | 0      | 0      | 0.08cd |
| RN0900 | 2059   | Fryns syndrome                         | 0.01cd | 0      | 0     | 0      | 0      | 0      | 0.07cd | 0      | 0      | 0      |
| RN0910 | 374    | Goldenhar syndrome                     | 0.62m  |        | 0     |        | 1.94cd | 0.77cd | 0.54cd | 0.82cd | 1.69cd | 0.75cd |
| RN0930 | 392    | Holt-Oram syndrome                     | 0.06m  | 0      | 0     | 0      | 0      | 0      | 0      | 0.27cd | 0.21cd | 0.08cd |
| RN0940 | 2322   | Kabuki make-up syndrome                | 0.31m  | 0.23ad | 2.6ad | 0.1ad  | 0      | 0      | 0.14cd | 0      | 0.63cd | 0.08cd |
| RN0950 | 98861  | Primary ciliary dyskinesia, Kartagener | 0.56m  | 0.91ad |       | 0.54ad | 0.65cd |        |        | 0      | 0.84cd |        |
| RN0960 | 163634 | Maffucci syndrome                      | 0.05m  | 0      | 0     | 0.03ad | 0      | 0      | 0.2cd  | 0.27cd | 0      | 0.08cd |
| RN0970 | 560    | Marshall syndrome                      | 0.01ad | 0      | 0     | 0      | 0      | 0      | 0      | 0      | 0      | 0      |
| RN0980 | 564    | Meckel Syndrome                        | 0.01cd | 0      | 0     | 0      | 0      | 0      | 0      | 0      | 0      | 0      |
| RN0990 | 570    | Moebius syndrome                       | 0.13m  | 0      | 0     | 0      | 0      | 0      | 0.2cd  | 0      | 0      | 0.08cd |
| RN1000 | 245    | Nager syndrome                         | 0.01cd | 0      | 0     | 0      | 0      | 0      | 0.07cd | 0      | 0      | 0      |
| RN1010 | 648    | Noonan syndrome                        | 1.3m   | 1.28ad | 0     |        | 3.24cd | 0      | 1.43cd | 2.45cd |        | 2.11cd |
| RN1020 |        | Opitz syndrome                         | 0.04m  | 0      | 0     | 0      | 0      | 0      | 0      | 0      | 0      | 0.08ad |
| RN1040 | 710    | Pfeiffer syndrome                      | 0.03m  | 0.15ad | 0     | 0      | 0      | 0      | 0      | 0      | 0      | 0.08cd |
| RN1070 | 97360  | Robinow syndrome                       | 0.01cd | 0      | 0     | 0      | 0      | 0      | 0.07cd | 0      | 0      | 0      |
| RN1080 | 813    | Silver-Russell syndrome                | 0.29m  | 0.15ad | 0     | 0      | 0      | 0      | 0.41cd | 0      | 0      | 0.3cd  |
| RN1100 | 808    | Seckel syndrome                        | 0.02m  | 0      | 0     | 0.03ad | 0      | 0      | 0.07cd | 0      | 0      | 0      |
| RN1120 |        | Simpson-Golabi-Behmel syndrome         | 0.02m  | 0.08ad | 0     | 0      | 0      | 0      | 0      | 0      | 0      | 0      |
| RN1130 | 1297   | Branchio-oculo-facial syndrome         | 0.02m  | 0      | 0     | 0      | 0      | 0      | 0      | 0      | 0      | 0.08cd |
| RN1140 | 107    | Branchio-oto-renal syndrome            | 0.09m  | 0      | 0     | 0.03ad | 0.65cd | 0.77cd | 0      | 0.27cd | 0      | 0.3cd  |
| RN1150 | 1340   | Cardiofaciocutaneous syndrome          | 0.13m  | 0      | 0     | 0.1ad  | 0      | 0.77cd | 0.14cd | 0      | 0      | 0      |
| RN1170 | 744    | Proteus syndrome                       | 0.08m  | 0.08ad | 0     | 0.03ad | 0      | 0      | 0.07cd | 0      | 0.21cd | 0      |
| RN1180 | 324764 | Trichorhinophalangeal syndrome         | 0.12m  | 0      | 0     | 0      | 0.65cd | 0      | 0      | 0      | 0      | 0.15cd |
| RN1190 | 2614   | Nail-patella syndrome                  | 0.14m  | 0.08ad | 0     | 0.1ad  | 0      | 0      | 0.27cd | 0      | 0.21cd | 0.23cd |
| RN1200 |        | Smith-Lemli-Opitz syndrome type 1      | 0.04m  | 0.08ad | 0     | 0      | 0      | 0      | 0      | 0      | 0.21cd | 0      |
| RN1210 | 819    | Smith-Magenis syndrome                 | 0.14m  | 0      | 0     | 0      | 0      | 0      | 0.27cd | 0.54cd | 0.21cd |        |
| RN1220 | 828    | Stickler syndrome                      | 0.13m  | 0.45ad | 0     | 0.03ad | 0      | 0      | 0.14cd | 0      | 0      | 0      |

|        |        |                                          |        |        |       |        |        |        |        |        |        |        |
|--------|--------|------------------------------------------|--------|--------|-------|--------|--------|--------|--------|--------|--------|--------|
| RN1240 | 857    | Townes-Brocks syndrome                   | 0.01m  | 0      | 0     | 0      | 0      | 0.77cd | 0      | 0      | 0      | 0      |
| RN1250 | 887    | VACTERL/VATER association                | 0.23m  | 0.15ad | 0     | 0.17ad | 0.65cd | 0.77cd | 0.2cd  | 0      | 0.63cd | 0.3cd  |
| RN1270 | 904    | Williams syndrome                        | 0.98m  | 0.45ad | 0     |        | 0.65cd | 0.77cd | 0.81cd | 2.17cd |        | 1.28cd |
| RN1280 | 3460   | Winchester syndrome                      | 0.01ad | 0      | 0     | 0      | 0      | 0      | 0.07ad | 0      | 0      | 0      |
| RN1290 | 3463   | Wolfram syndrome                         | 0.06m  | 0      | 0     | 0.07cd | 0      | 0      | 0      | 0      | 0      | 0.08cd |
| RN1300 | 72     | Angelman syndrome                        | 0.38m  | 0.15ad | 2.6cd | 0.2ad  | 1.3cd  | 2.3cd  | 0.41cd | 0.27cd | 0      |        |
| RN1310 | 739    | Prader-Willi syndrome                    | 0.78m  |        | 2.6ad |        | 1.3cd  | 3.07cd | 1.02cd |        | 1.27cd | 0.6cd  |
| RN1320 | 558    | Marfan syndrome                          | 1.79m  | 1.13ad | 0     | 0.71ad | 3.24cd | 0.77ad |        | 1.9cd  | 0.42cd | 2.11cd |
| RN1330 | 908    | Fragile X syndrome                       | 1.15m  | 0.91ad | 0     | 0.13ad | 3.24cd | 1.53cd | 1.29cd | 0.54cd | 1.69cd |        |
| RN1350 |        | Alagille syndrome                        | 0.18m  | 0.3ad  | 0     | 0.1ad  | 0.65cd | 1.53cd | 0.2cd  | 1.09cd | 0.21cd | 0.15cd |
| RN1360 | 63     | Alport syndrome                          | 0.61m  | 0.45ad | 0     | 0.3ad  | 0      | 0.77cd |        | 1.63cd |        |        |
| RN1370 | 64     | Alström syndrome                         | 0.03m  | 0      | 0     | 0      | 0      | 0      | 0      | 0.54cd | 0      | 0      |
| RN1380 | 110    | Bardet-Biedl syndrome                    | 0.13m  | 0.15ad | 0     | 0.03cd | 0.65ad | 0      | 0.2cd  | 0      | 0      | 0.08cd |
| RN1410 | 199    | Cornelia de Lange syndrome               | 0.2m   | 0      | 0     | 0.17ad | 1.3cd  | 0      | 0.14cd | 0.27cd | 0.21cd | 0.23cd |
| RN1430 | 220    | Denys-Drash syndrome                     | 0.02cd | 0      | 0     | 0      | 0      | 0.77cd | 0      | 0      | 0      | 0      |
| RN1440 | 2710   | Oculodentodigital dysplasia              | 0.01cd | 0      | 0     | 0      | 0      | 0      | 0      | 0      | 0      | 0      |
| RN1450 | 94068  | Congenital spondyloepiphyseal dysplasia  | 0.08m  | 0.08ad | 0     | 0.03cd | 0      | 0      | 0.14cd | 0      | 0      | 0.08cd |
| RN1460 | 2052   | Fraser syndrome                          | 0.01ad | 0      | 0     | 0.03ad | 0      | 0      | 0      | 0      | 0      | 0      |
| RN1480 | 435    | Ito hypomelanosis                        | 0.1m   | 0.08ad | 0     | 0.17ad | 0      | 0      | 0      | 0      | 0      | 0.08cd |
| RN1490 |        | Isaacs syndrome                          | 0.06m  | 0.15ad | 0     | 0      | 0.65cd | 0      | 0      | 0      | 0      |        |
| RN1500 | 477    | KID Syndrome                             | 0.01ad | 0      | 0     | 0      | 0      | 0      | 0      | 0      | 0      | 0      |
| RN1510 | 90308  | Klippel-Trénaunay syndrome               | 0.49m  | 0.38ad | 0     |        | 0.65cd | 0      | 0.68cd | 0.82cd | 0.42cd | 0.98cd |
| RN1520 | 98818  | Landau-Kleffner syndrome                 | 0.02m  | 0.08ad | 0     | 0      | 0      | 0      | 0.14cd | 0      | 0      | 0      |
| RN1530 | 500    | LEOPARD syndrome                         | 0.08m  | 0.08ad | 0     | 0.1ad  | 0.65cd | 0      | 0.07cd | 0      | 0      | 0.08cd |
| RN1570 | 263440 | Neuroacanthocytosis                      | 0.02m  | 0      | 0     | 0      | 0      | 0      | 0.14cd | 0      | 0      | 0.08cd |
| RN1580 | 649    | Norrie disease                           | 0.01ad | 0      | 0     | 0      | 0      | 0      | 0      | 0      | 0      | 0      |
| RN1590 | 884    | Pallister-Killian syndrome               | 0.04m  | 0.08ad | 0     | 0      | 0      | 0      | 0      | 0.27cd | 0      |        |
| RN1600 | 699    | Pearson syndrome                         | 0.01cd | 0      | 0     | 0      | 0      | 0      | 0      | 0      | 0.21cd | 0      |
| RN1610 | 2905   | POEMS syndrome                           | 0.04m  | 0.15ad | 0     | 0.07ad | 0      | 0      |        | 0      | 0      | 0      |
| RN1620 | 783    | Rubinstein-Taybi syndrome                | 0.16m  | 0.08ad | 0     | 0.03ad | 0.65cd | 0      | 0.14cd | 0.27cd | 0.21cd | 0.15cd |
| RN1640 | 1466   | COFS syndrome                            | 0.01cd | 0      | 0     | 0      | 0      | 0      | 0      | 0      | 0      | 0      |
| RN1650 | 404560 | Familial dysplastic nevus syndrome       | 0.33m  | 0      | 0     | 0.13ad | 4.53cd | 0      | 0.07cd | 0.27cd | 1.48cd | 0.15cd |
| RN1660 | 35125  | Epidermal nevus syndrome                 | 0.04m  | 0      | 0     | 0      | 0      | 0.77cd | 0.07cd | 0      | 0.21cd | 0      |
| RN1670 |        | Multiple pterygium syndrome              | 0.02m  | 0      | 0     | 0      | 0      | 0      | 0      | 0      | 0      | 0      |
| RN1680 | 3352   | Tricho-dento-osseous syndrome            | 0.01cd | 0      | 0     | 0      | 0      | 0      | 0      | 0      | 0      | 0      |
| RN1690 |        | Radio-ulnar synostosis-amegakaryocytosis | 0.01cd | 0      | 0     | 0      | 0      | 0      | 0      | 0      | 0      | 0      |
| RN1700 | 816    | Sjögren-Larsson syndrome                 | 0.26m  | 0      | 0     | 0      | 0      | 0      | 0.07cd | 2.99cd | 0      | 0      |

|        |        |                                         |        |         |       |         |         |         |         |         |         |         |
|--------|--------|-----------------------------------------|--------|---------|-------|---------|---------|---------|---------|---------|---------|---------|
| RN1720 | 3437   | Vogt-Koyanagi-Harada disease            | 0.2m   | 0.3ad   | 0     | 0.07cd  | 1.3cd   | 0.77cd  | 0.27cd  | 0       | 0.42cd  |         |
| RN1750 | 3449   | Weill-Marchesani syndrome               | 0.02m  | 0       | 0     | 0       | 0       | 0       | 0       | 0       | 0       | 0       |
| RN1760 | 912    | Zellweger syndrome                      | 0.04m  | 0       | 0     | 0.03cd  | 0       | 0       | 0       | 0       | 0       | 0       |
| RP0010 | 290    | Congenital rubella syndrome             | 0.17cd | 0       | 0     | 0       | 0       | 0       | 0       | 0       | 0       | 0       |
| RP0040 | 1915   | Fetal alcohol syndrome                  | 0.25m  | 0.15ad  | 0     | 0.03cd  | 0       | 0       | 0.07cd  | 0.82cd  | 0.42cd  |         |
| RP0050 | 70590  | Infantile apnea                         | 0.78m  | 0       | 0     | 0       | 0       | 0       | 0       | 0       | 0.21cd  | 0       |
| RP0060 | 415286 | Bilirubin encephalopathy                | 0.01cd | 0       | 0     | 0       | 0       | 0       | 0       | 0       | 0       | 0       |
| RP0070 |        | Congenital hepatic fibrosis             | 0.06m  | 0.08ad  | 0     | 0.1ad   | 0       | 0       | 0.2cd   | 0.54cd  | 0       | 0       |
| RN0460 | 1988   | Femoral-facial syndrome                 | 0.01cd | 0       | 0     | 0.03cd  | 0       | 0       | 0       | 0       | 0       | 0       |
| RN0730 | 3163   | SHORT syndrome                          | 0.01ad | 0       | 0     | 0       | 0       | 0       | 0       | 0       | 0       | 0       |
| RN1090 | 798    | Schinz-Giedion syndrome                 | 0.01cd | 0       | 0     | 0.03cd  | 0       | 0       | 0       | 0       | 0       | 0       |
| RN1110 |        | Fetal hypokinesia syndrome              | 0.01cd | 0       | 0     | 0       | 0       | 0       | 0.07cd  | 0       | 0       | 0       |
| RN1160 | 1647   | Oculocerebrocutaneous syndrome          | 0.01cd | 0       | 0     | 0       | 0       | 0       | 0       | 0       | 0       | 0       |
| RN1630 | 36     | Acrocallosal syndrome                   | 0.01cd | 0       | 0     | 0       | 0       | 0       | 0       | 0       | 0       | 0       |
| RP0020 | 1906   | Fetal valproate syndrome                | 0.01cd | 0       | 0     | 0       | 0       | 0       | 0       | 0       | 0       | 0       |
| RP0030 | 1912   | Fetal hydantoin syndrome                | 0.01cd | 0       | 0     | 0       | 0       | 0       | 0       | 0       | 0       | 0       |
| RBG010 |        | Neurofibromatoses                       | 10.08m | 9.97ad  | 2.6cd |         | 19.43cd | 9.97cd  | 13.03cd | 20.93cd | 7.17cd  | 8.14cd  |
| RCG010 |        | Primary hyperaldosteronisms             | 1.35m  | 1.74ad  | 0     | 0.5ad   | 3.24cd  | 1.53cd  | 2.44cd  | 1.63cd  |         | 2.94cd  |
| RCG020 |        | Congenital adrenogenital syndromes      | 2.17m  | 0.91ad  | 0     |         | 3.89cd  | 7.67cd  | 1.22cd  | 3.26cd  | 1.69cd  | 3.84cd  |
| RCG030 |        | Autoimmune polyendocrinopathies         | 2.58m  | 2.49ad  | 0     | 2.55ad  | 7.13cd  | 1.53cd  | 1.43cd  | 1.63cd  | 2.53cd  | 6.03cd  |
| RCG040 |        | Disturbances of aminoacid transport     | 7.92m  | 4.08ad  | 5.2ad | 3.09ad  | 5.83cd  |         | 5.09cd  | 7.88cd  | 16.88cd | 6.48cd  |
| RCG050 |        | Urea cycle disturbances                 | 0.38m  | 0.23ad  | 5.2ad |         | 0       | 0       | 0.41cd  | 0.82cd  | 0.84cd  | 0.08ad  |
| RCG060 |        | Disturbances of carbohydrate transp     | 1.69m  | 1.21ad  | 0     |         | 1.3cd   | 0.77cd  | 3.26cd  |         |         | 1.13cd  |
| RCG070 |        | Congenital alterations of lipoprotein r | 1.37m  | 1.21ad  | 0     | 0.91ad  |         | 3.84cd  | 1.36cd  | 3.81cd  | 3.16cd  | 2.56cd  |
| RCG080 |        | Lipid storage disturbances              | 1.77m  | 1.44ad  | 0     |         | 0.65cd  |         | 1.49cd  | 1.36cd  | 1.69cd  | 3.77cd  |
| RCG090 |        | Mucopolysaccharidoses                   | 0.04m  | 0       | 0     | 0.03cd  | 0       | 0       | 0.07cd  | 0       | 0       | 0       |
| RCG100 |        | Congenital alterations of iron metabo   | 8.04m  | 18.21ad | 0     | 1.98ad  | 25.26cd | 16.88cd | 22.12cd | 4.62cd  | 13.29cd | 17.1cd  |
| RCG110 |        | Porphyrias                              | 0.73m  |         | 2.6ad |         |         | 0.77ad  |         |         | 0.21cd  |         |
| RCG120 |        | Disorders of purine and pyrimidine m    | 0.04m  | 0       | 0     | 0.03ad  | 0       | 0       | 0       | 0       | 0.21cd  | 0       |
| RCG130 |        | Primary and familial amyloidoses        | 1.81m  | 4.38ad  | 0     | 1.48ad  | 0.65cd  |         |         |         |         |         |
| RCG140 |        | Mucopolysaccharidoses                   | 0.38m  | 0.38ad  | 0     |         | 0.65cd  | 1.53cd  | 0.34cd  | 0.54cd  | 0.63cd  | 0.3cd   |
| RCG150 |        | Chronic histiocytoses                   | 1.27m  | 1.44ad  | 0     | 0.3ad   | 0.65cd  | 0       | 1.56cd  | 0.27cd  | 1.48cd  | 2.49cd  |
| RCG160 |        | Primary immunodeficiencies              | 6.36m  | 4.16ad  | 2.6ad |         | 7.77cd  |         | 9.84cd  | 15.5cd  | 11.18cd | 7.16cd  |
| RDG010 |        | Hereditary anemias                      | 15.04m | 11.56ad | 2.6ad |         | 18.78cd |         | 24.97cd | 3.26cd  | 52.32cd | 26.59cd |
| RDG020 |        | Hereditary coagulation defects          | 25.16m | 31.81ad |       | 11.42ad | 20.08cd | 23.01cd | 20.97cd | 3.53cd  | 33.33cd | 24.18cd |
| RDG030 |        | Hereditary thrombocytopathies           | 0.49m  | 0.45ad  | 0     | 0.1ad   | 0.65cd  | 0.77cd  | 0.54cd  | 0.54cd  | 1.27cd  | 0.53cd  |
| RDG040 |        | Primary hereditary thrombocytopenia     | 0.44m  | 0.3ad   | 0     | 0.57ad  | 0       | 0       | 0       | 1.09ad  | 0       |         |



|        |                                       |        |         |       |         |         |         |         |         |         |         |
|--------|---------------------------------------|--------|---------|-------|---------|---------|---------|---------|---------|---------|---------|
| RFG010 | Leucodystrophies                      | 0.61m  | 0.6ad   | 0     |         | 0.65cd  | 3.07cd  | 1.36cd  | 1.36cd  | 0.21cd  | 0.45cd  |
| RFG020 | Ceroid lipofuscinoses                 | 0.1m   | 0       | 0     | 0       | 0.65cd  | 0.77cd  |         | 0.27cd  | 0.21ad  | 0       |
| RFG030 | Gangliosidoses                        | 0.1m   | 0.08ad  | 0     | 0.03ad  | 0       | 0       | 0.14cd  | 0.27cd  | 0       | 0.08cd  |
| RFG040 | Spinocerebellar diseases              | 6.52m  | 3.85ad  | 2.6ad | 3.59ad  | 2.59cd  |         |         |         |         |         |
| RFG050 | Spinal muscular atrophies             | 1.59m  | 1.06ad  | 2.6ad | 0.77ad  | 2.59cd  | 3.07cd  | 2.44cd  | 2.72cd  |         | 1.36cd  |
| RFG060 | Hereditary neuropathies               | 6.61m  | 6.95ad  | 0     |         |         | 15.34cd | 8.89cd  | 3.26cd  | 12.02cd | 7.01cd  |
| RFG070 | Hereditary congenital miopathies      | 1.31m  | 0.98ad  | 0     | 0.4ad   | 1.94cd  |         | 0.88cd  | 0.27cd  |         |         |
| RFG080 | Muscular dystrophies                  | 8.12m  | 2.87ad  | 2.6ad |         | 3.89cd  | 6.9cd   | 7.87cd  | 11.96cd | 6.12cd  | 5.65cd  |
| RFG090 | Miotonic dystrophies                  | 4.44m  | 5.36ad  | 0     | 1.34ad  | 3.89cd  | 4.6cd   |         | 5.71cd  |         | 4.52cd  |
| RFG100 | Normo-, hypo- and hyperkalemic par    | 0.15m  | 0.15ad  | 0     | 0.1ad   | 0       | 0       | 0.07cd  | 0       |         | 0.23cd  |
| RFG110 | Hereditary retinic dystrophies        | 17.6m  | 10.58ad | 0     |         |         |         |         |         |         |         |
| RFG120 | Hereditary choroid dystrophies        | 0.41m  |         | 0     | 0.07ad  | 0       | 0       | 0.27cd  | 0.27cd  | 0       | 0.45cd  |
| RFG130 | Corneal degenerations                 | 0.18m  | 0.08ad  | 2.6cd | 0.03cd  | 3.24cd  | 0       | 0.34cd  | 0.27cd  | 0       | 0.08cd  |
| RFG140 | Hereditary corneal dystrophies        | 1.1m   |         | 0     |         | 1.94cd  | 2.3cd   | 3.8cd   | 1.09cd  | 0.84cd  | 2.03cd  |
| RGG010 | Thrombotic microangiopathies          | 1.16m  | 0.53ad  | 0     |         | 1.3cd   | 2.3cd   | 1.22cd  | 0       | 7.81cd  |         |
| RMG010 | Undifferentiated connective tissue sy | 17.75m | 12.09ad | 0     | 17.57ad | 10.36cd | 16.88cd | 23.07cd | 54.92cd | 40.71cd | 28.78cd |
| RNG010 | Pseudohermaphroditisms                | 0.47m  | 0.23ad  | 0     | 0.2ad   | 0.65cd  | 0       |         | 0       |         | 0.23cd  |
| RNG020 | Multiple congenital arthrogryposes    | 0.16m  | 0.15ad  | 0     | 0       | 0.65cd  | 0       | 0.14cd  | 0.27cd  | 0       | 0.23cd  |
| RNG030 | Acrocephalosyndactyly                 | 0.04m  | 0       | 0     | 0       | 0.65cd  | 0       | 0.07cd  | 0       | 0       | 0.08cd  |
| RNG040 | Congenital craniofacial anomalies     | 3.81m  |         | 0     |         | 9.07cd  | 14.58cd | 15.27cd | 2.45cd  | 4.64cd  | 7.31cd  |
| RNG050 | Congenital chondrodystrophies         | 2.56m  |         | 0     |         | 1.94cd  | 1.53cd  | 3.39cd  | 2.17cd  | 5.48cd  | 3.31cd  |
| RNG060 | Congenital osteodystrophies           | 3.37m  | 5.59ad  | 0     |         | 4.53cd  | 4.6cd   | 3.87cd  | 3.26cd  | 2.95cd  | 3.47cd  |
| RNG070 | Congenital ichthyoses                 | 1.74m  | 2.27ad  | 2.6ad | 0.07ad  | 1.3cd   |         | 1.7cd   | 0       | 1.48cd  | 1.58cd  |
| RNG080 | Chromosomal aneuploidy syndromes      | 1.27m  |         | 0     | 0.74ad  | 3.24cd  | 0       | 0.75cd  | 0       |         |         |
| RNG090 | Chromosomal duplication/deficiency    | 7.82m  | 3.48ad  | 0     | 3.33ad  | 20.73cd | 13.81cd | 11.33cd | 3.53cd  |         | 7.46cd  |
| RNG100 | Other congenital anomalies with intel | 3.18m  | 1.36ad  | 0     | 0.97ad  | 0       | 0       | 0.81cd  |         |         |         |

# Supplementary File 4 - Table S4.1

|           |            | Average population in the period 2012-2014 (million) |         |        |        |         |         |          |         |            |          |         |          |
|-----------|------------|------------------------------------------------------|---------|--------|--------|---------|---------|----------|---------|------------|----------|---------|----------|
|           |            | 3.732                                                | 0.893   | 1.550  | 5.773  | 1.326   | 0.314   | 5.834    | 4.077   | 0.577      | 1.972    | 5.062   | 1.656    |
| RNMR Code | ORPHA Code | Toscana                                              | Umbria  | Marche | Lazio  | Abruzzo | Molise  | Campania | Puglia  | Basilicata | Calabria | Sicilia | Sardegna |
| RA0010    | 548        | 0                                                    | 0       | 0      | 0      | 0       | 0       | 0        | 0.08cd  | 0          | 0        | 0       | 0        |
| RA0020    | 3452       | 0                                                    | 0       | 0      | 0.06ad | 0       | 0       | 0        | 0.08cd  | 0          | 0        | 0.13ad  | 0.2ad    |
| RA0030    | 91546      | 0.09ad                                               | 0       | 0.43ad | 0.46ad | 0       | 0       | 0        | 0.08cd  | 0          | 0        | 0.07ad  | 0        |
| RB0010    | 654        | 0.98ad                                               |         | 0.22cd | 0.98ad | 2.01cd  | 3.19cd  | 1.2cd    |         | 0.58cd     | 0.17ad   | 0.07ad  | 0        |
| RB0020    | 790        | 0.09ad                                               | 0.37ad  | 0      | 0.92ad | 7.04ad  | 0       |          |         | 0.58ad     |          | 0.72ad  | 0.6ad    |
| RB0040    | 79665      | 0                                                    | 0.75cd  | 0      | 0.12ad | 0       | 0       | 0        | 0.16cd  | 0          | 0        | 0       | 0        |
| RB0050    | 733        | 0.36ad                                               | 1.49ad  | 1.51ad |        | 1.51ad  | 1.06cd  | 2.34cd   | 8.75cd  | 4.04cd     | 0.17ad   |         | 1.61ad   |
| RB0060    | 538        | 0.54ad                                               | 0.37ad  | 1.51ad |        | 0       | 0       |          |         | 0          | 0.17cd   |         | 0        |
| RC0010    | 199296     | 0                                                    | 1.12cd  | 0      | 0.06ad | 0.25ad  | 0       | 0.4cd    | 0.25cd  | 0          |          |         |          |
| RC0020    | 478        | 0.45ad                                               | 1.12cd  | 0.65ad |        | 0.25ad  | 0       | 2.51cd   |         | 0          | 0.51ad   |         | 0        |
| RC0030    |            | 0.09ad                                               | 0       | 0      | 0.12ad | 0       | 0       | 0.17cd   | 0.08cd  | 0          | 0        | 0       | 0        |
| RC0040    | 169615     | 8.57ad                                               | 23.15cd | 8.6ad  | 5.77ad |         | 22.31ad | 6.17cd   | 11.28cd |            |          | 3.75ad  | 4.03ad   |

|        |        |         |        |         |         |        |        |         |         |        |        |         |         |
|--------|--------|---------|--------|---------|---------|--------|--------|---------|---------|--------|--------|---------|---------|
| RC0050 | 508    | 0       | 0      | 0.22ad  | 0       | 0      | 0      | 0       | 0       | 0      | 0      | 0       | 0       |
| RC0060 | 902    | 0       | 0      | 0       | 0.06ad  | 0      | 0      | 0       | 0       | 0      | 0      | 0       | 0       |
| RC0080 |        | 0.09ad  | 0.37ad | 0       | 0.06ad  | 0.25ad | 0      | 0       | 0.16cd  | 0      | 0      | 0.33ad  | 0       |
| RC0090 | 36397  | 0.09ad  | 0      | 0       | 0.12ad  | 0      | 1.06ad | 0.06cd  | 0       | 0      | 0      | 0       | 0.2ad   |
| RC0100 | 333    | 0       | 0      | 0       | 0       | 0      | 0      | 0       | 0       | 0.58cd | 0      | 0       | 0       |
| RC0110 |        | 3.66ad  |        | 0.65ad  | 3ad     | 0.25ad | 1.06ad |         | 1.39cd  | 0.58ad |        |         | 0.2cd   |
| RC0120 | 48818  | 0       | 0      | 0       | 0       | 0      | 0      | 0       | 0       | 0      | 0      | 0       | 0       |
| RC0150 | 905    |         |        | 0       |         |        |        | 1.89cd  |         | 0      |        | 0.46ad  | 0.2ad   |
| RC0160 | 436    | 0.09ad  | 0      | 0       | 0       | 0      | 0      | 0       | 0.08cd  | 0      | 0      | 0       | 0       |
| RC0170 |        | 0.54ad  | 0.75cd | 0.43ad  | 0.12ad  | 0      | 0      |         |         | 0.58ad | 0.34ad |         | 0       |
| RC0180 | 205    | 0.36ad  | 0      | 0       | 0.06ad  | 0      | 0      | 0       | 0       | 0      | 0      | 0       | 0       |
| RC0190 | 91378  |         | 0.37cd | 1.08ad  | 0.4ad   | 0.75ad | 0      | 0       | 2.78cd  | 1.73cd | 0.17cd | 0.99ad  | 0.2ad   |
| RC0200 | 60     | 0.71ad  |        | 0       | 0.06ad  | 0.25ad | 0      | 0       | 0.65cd  | 0      | 0      | 0.07ad  | 0       |
| RC0210 | 117    | 7.59ad  |        |         | 3.18ad  |        |        |         | 5.8cd   | 0.58ad | 3.38ad |         | 1.81ad  |
| RD0010 |        | 1.43ad  | 0.75cd |         | 0.29ad  | 0      | 0      | 0.51cd  | 0.16cd  | 0.58ad | 0.17cd | 0.07ad  | 0       |
| RD0020 | 447    | 0.18ad  | 0.37cd | 0.22ad  | 0.46ad  | 0      | 0      | 0       | 0.41cd  | 0      | 0      | 0       | 0.4ad   |
| RD0030 | 761    |         | 2.24cd | 0.86ad  | 5.54ad  | 1.01ad | 1.06cd |         |         | 1.16ad |        | 0.66ad  | 0.2ad   |
| RD0040 | 2686   | 0.09ad  | 0.75cd | 0       | 0.06ad  | 0      | 0      | 0.11cd  | 0.57cd  | 0.58cd | 0      | 0       | 0       |
| RD0050 | 379    | 0.09ad  | 2.99cd | 0       |         | 0      | 0      | 0.46cd  | 0.57cd  | 0      | 0.34ad | 0       | 0.2ad   |
| RF0010 | 726    | 0       | 0      | 0       | 0.06ad  | 0      | 0      | 0       | 0       | 0      | 0      | 0       | 0       |
| RF0020 | 480    | 0.09ad  | 0.37cd | 0.43ad  | 0.69ad  | 0.25ad | 1.06ad |         |         | 0.58ad | 0.17ad | 0       | 0       |
| RF0030 | 506    | 0       | 0      | 0.43ad  | 0.12ad  | 0      | 0      |         | 0       | 0      | 0.17cd | 0       | 0.2ad   |
| RF0040 | 778    | 0.45ad  |        | 0.43ad  | 0.4ad   | 0.5ad  | 0      |         |         | 0      | 0.34ad |         | 0       |
| RF0050 | 101    | 0       | 0      | 0       | 0.06ad  | 0      | 0      | 0       | 0       | 0      | 0      | 0       | 0       |
| RF0060 | 98261  | 0.09ad  | 0.37cd | 0.43ad  | 0.17ad  | 0      | 0      |         |         | 0      | 0.34cd | 0.26cd  | 0.2ad   |
| RF0070 | 36899  | 0       | 0      | 0       | 0       | 0      | 0      | 0       | 0       | 0      | 0      | 0       | 0       |
| RF0080 | 399    | 1.52ad  |        | 1.08ad  |         | 1.01ad | 1.06ad | 10.74cd | 10.47cd |        |        |         | 0.6ad   |
| RF0090 |        |         |        | 1.51ad  | 4.79ad  | 2.01ad | 1.06ad |         |         |        | 0.34ad | 0.66ad  | 1.21ad  |
| RF0100 | 803    | 17.68ad |        | 23.23ad | 18.13ad | 6.79ad |        | 13.77cd | 17.58cd |        |        | 10.27ad | 10.67ad |
| RF0110 | 35689  | 0.54ad  | 0.75ad | 0.22ad  | 0.69ad  | 1.01ad | 0      |         |         | 0.58ad | 0.51ad |         | 0       |
| RF0120 |        | 0       | 1.12ad | 0.43ad  | 0.23ad  | 0      | 1.06ad |         |         | 0      | 0      | 0       | 0.2ad   |
| RF0130 | 2382   |         | 0.75ad |         | 0.06ad  |        | 0      |         | 0.57cd  | 0      | 0.17cd | 0.13cd  | 0.4ad   |
| RF0140 | 3451   | 0.27ad  | 1.49ad | 0.65ad  | 1.5ad   | 1.26ad | 0      |         |         | 0      |        |         | 0.2cd   |
| RF0150 | 2073   |         | 1.87cd |         |         | 0.25cd | 1.06cd | 0.4cd   | 0.98cd  | 0.58cd | 0.17cd |         | 0       |
| RF0160 | 2483   | 0.18ad  | 0      | 0       | 0.06ad  | 0      | 0      | 0.06ad  | 0.08cd  | 0      | 0      | 0       | 0       |
| RF0170 | 240071 | 1.07ad  | 0      | 0.65ad  | 1.1ad   | 0      | 0      | 1.2cd   | 0.57cd  | 0      | 0      | 0       | 0       |
| RF0180 | 2932   | 1.43ad  |        | 4.09ad  | 3ad     | 1.01ad | 1.06cd | 2.69cd  | 4.5cd   | 0.58cd | 0.51ad | 0.4ad   |         |

|        |        |        |          |         |         |        |         |        |         |        |        |        |        |
|--------|--------|--------|----------|---------|---------|--------|---------|--------|---------|--------|--------|--------|--------|
| RF0190 | 43393  | 0.36ad | 0        | 0       | 0.12ad  | 0.25ad | 0       | 0.06ad | 0.08cd  | 0      | 0.17ad | 0.07ad | 0      |
| RF0200 | 891    |        | 1.12cd   | 0.22ad  | 0.06cd  | 0.75ad | 0       |        |         | 0.58ad | 0.17ad | 0.13ad | 0.2ad  |
| RF0210 | 40923  | 0      | 0        | 0.22ad  | 0       | 0      | 0       | 0      | 0.16cd  | 0      | 0      | 0      | 0.2ad  |
| RF0230 | 263479 | 0.09ad | 0.37ad   | 0       | 1.27ad  | 0.25ad | 0       |        |         | 0      |        | 0.07cd | 0      |
| RF0240 | 98981  | 0      | 0.37cd   | 0       | 0       | 0      | 0       | 0      | 0       | 0      | 0      | 0      | 0      |
| RF0250 | 215    | 0      | 0        | 0       | 0       | 0      | 0       | 0      | 0.08cd  | 0      | 0      | 0      | 0      |
| RF0270 | 1467   | 0.36ad | 0.37cd   | 0       | 0.06ad  | 0      | 0       | 0.11cd | 0       | 0.58cd | 0      | 0.07cd | 0      |
| RF0280 | 156071 |        | 142.28cd | 16.13ad | 21.65ad |        |         |        | 62.46cd |        |        |        | 9.06ad |
| RF0290 | 97231  | 0      | 0        | 0       | 0       | 0      | 0       | 0      | 0       | 1.16ad | 0      | 0      | 0      |
| RF0300 | 104    |        |          | 0.43ad  |         |        | 1.06cd  | 0.69cd |         | 0.58cd |        |        | 0      |
| RG0010 |        | 0.09ad | 4.11cd   | 1.51ad  | 3.41ad  |        | 2.12ad  | 3.6cd  |         | 0      | 0      | 0.2ad  | 0      |
| RG0020 | 727    | 0.98ad | 3.36cd   | 0       |         | 1.26ad |         | 0.11cd | 1.23cd  |        |        |        | 0      |
| RG0030 | 767    |        | 0.37cd   | 0.43ad  | 0.17ad  | 0.25ad | 0       | 0.23cd | 0.08cd  | 0.58ad |        | 0.2ad  | 0.2cd  |
| RG0040 | 2331   | 0.36ad | 10.08cd  | 2.15ad  | 4.21ad  | 2.51ad | 0       |        | 2.37cd  | 0.58ad | 1.69ad | 1.12ad | 0      |
| RG0050 | 183    | 3.48ad |          | 1.94ad  | 1.67ad  | 1.01ad | 1.06ad  |        |         |        |        | 0.79ad | 0.2ad  |
| RG0060 | 375    | 0.18ad | 0.75cd   | 0       | 0       | 0      | 0       | 0      | 0.08cd  | 0      | 0      | 0      | 0      |
| RG0070 | 900    | 2.05ad | 2.61cd   | 0.86ad  | 1.04ad  | 2.26ad | 0       |        | 1.96cd  | 1.16ad | 0.17cd |        | 0.2ad  |
| RG0080 | 397    | 5.54ad |          | 2.37ad  | 2.54ad  |        |         |        |         | 0.58ad | 0.68ad |        | 0.4cd  |
| RG0090 | 3287   | 0.89ad | 0.75cd   |         | 0.12ad  |        | 0       |        | 0.98cd  | 0      | 0.17ad | 0.13cd |        |
| RG0100 | 774    |        |          |         |         | 3.27ad | 10.62cd | 2.63cd | 7.6cd   |        |        |        |        |
| RG0110 | 131    | 0      |          | 0       | 0       | 0.25ad | 0       | 0.06cd | 0.41cd  | 0      | 0.17ad | 0.07ad | 0.2ad  |
| RI0010 | 930    |        |          |         | 6.58ad  |        |         |        |         |        |        |        | 6.04ad |
| RI0030 | 2070   |        | 0        | 0.65ad  | 0       | 0.25ad | 0       | 0      | 0.82cd  | 0      | 0.17cd | 0      | 0.2cd  |
| RI0040 |        | 0.09cd | 0        | 0.22ad  | 0       | 0      | 0       | 0.06cd | 0.33cd  | 0      | 0.34cd |        | 0      |
| RI0050 | 171    | 0.71ad | 2.99cd   |         |         | 0.75ad | 0       |        | 2.37cd  | 0.58cd | 0.17cd | 0.07ad | 0.2ad  |
| RI0070 | 2290   | 0      | 0        | 0.22ad  | 0       | 0      | 0       | 0      | 0       | 0      | 0      | 0      | 0      |
| RI0080 | 36204  | 0.09ad | 0        |         | 0       | 0      | 0       | 0.06cd | 0.08cd  | 0      | 0      | 0      | 0      |
| RJ0010 | 223    | 0.09ad | 0        | 0       | 0       | 0      | 0       | 0      | 0.25cd  | 0      | 0.17ad |        | 0      |
| RJ0020 | 49041  | 0.98ad | 1.12cd   |         | 0.23cd  |        | 0       |        |         |        | 0.51ad | 0.2cd  | 0.2ad  |
| RJ0030 | 37202  | 3.3ad  |          | 1.08ad  | 7.79ad  | 2.01ad | 3.19ad  |        |         | 1.16ad |        | 1.25ad | 3.02ad |
| RL0020 | 1656   | 1.43ad | 0.37cd   | 0.43ad  | 0.35ad  | 0.25ad | 0       | 0      | 0.41cd  | 0      | 0.17ad | 0.07ad | 0      |
| RL0030 |        | 4.29ad | 6.35cd   | 2.58ad  | 2.77ad  | 1.26ad | 5.31cd  |        |         | 1.73ad | 2.54ad | 4.15ad | 1.41ad |
| RL0040 |        | 7.77ad |          |         | 5.43ad  |        | 3.19ad  |        | 2.7cd   | 1.16ad | 1.35ad | 2.44ad | 1.41ad |
| RL0050 | 46486  | 1.61ad | 0.37ad   |         |         | 0      | 0       | 0.11cd | 0.16cd  | 0      | 0.17ad | 0      | 0.2ad  |
| RL0060 |        |        | 6.72cd   |         | 9.87ad  |        | 1.06cd  |        |         | 0.58cd |        |        |        |
| RM0010 | 221    | 1.7ad  |          |         | 1.96ad  |        | 2.12cd  |        | 2.37cd  |        | 0.17ad | 0.79ad |        |
| RM0020 | 732    | 3.48ad |          | 2.15ad  | 2.48ad  | 0.25ad | 0       |        |         | 0      |        |        | 0.2ad  |

|        |        |        |        |        |        |        |        |        |        |        |        |        |       |
|--------|--------|--------|--------|--------|--------|--------|--------|--------|--------|--------|--------|--------|-------|
| RM0030 | 809    | 1.16ad | 3.36cd | 0.86ad | 0.87ad | 1.51ad | 1.06ad |        | 5.56cd | 0.58ad |        |        | 0.6ad |
| RM0040 | 3165   | 0.36ad | 0.75ad | 0      | 0.35ad | 0      | 0      | 0      | 0.08ad | 0      | 0.34ad |        | 0     |
| RM0050 |        | 0      | 0      | 0      | 0      | 0      | 0      | 0.17cd | 0      | 0.58cd | 0      | 0      | 0     |
| RM0060 | 728    | 0.45ad | 0      | 0      | 0.12ad | 0.25ad | 0      | 0.11cd | 0.16cd | 0      | 0      | 0.2ad  | 0     |
| RN0010 |        | 1.43ad |        | 3.66ad | 1.04ad | 4.27ad | 5.31ad |        |        |        | 5.2ad  |        |       |
| RN0020 | 199642 | 0      |        | 0.86ad | 0.29ad | 0      | 0      |        | 1.31cd | 0      | 0.51ad | 1.05ad | 0     |
| RN0030 |        | 0      | 0      | 0      | 0      | 0      | 0      | 0.11cd | 0.08cd | 0      | 0      | 0      | 0     |
| RN0040 | 475    | 0.18ad | 0.37ad | 0      | 0      | 0      | 0      | 0.06cd | 0.57cd | 0      | 0      | 0.13ad | 0     |
| RN0050 |        | 0      | 0      | 0.22ad | 0.12ad | 0.25ad | 0      |        | 0.57cd | 1.73ad | 0.17ad | 0.07ad | 0     |
| RN0060 | 2162   | 0.09ad | 0.37ad | 0      | 0.12ad | 0      | 0      | 0.06cd |        | 0      | 0.17ad | 0.07cd | 0.2ad |
| RN0080 | 1764   | 0      | 0      | 0.22ad | 0.06ad | 0      | 0      | 0.11cd | 0      | 0      | 0      | 0      | 0     |
| RN0090 |        | 0      | 0      | 0      | 0.06ad | 0      | 0      | 0      | 0      | 0      | 0      | 0      | 0     |
| RN0100 | 708    | 0.09ad | 0      | 0      | 0      | 0      | 0      | 0      | 0      | 0      | 0      | 0      | 0     |
| RN0110 | 77     |        | 0      | 0      | 0.17ad | 0      | 0      | 0.23cd | 0.08cd | 0      | 0      | 0.07ad | 0     |
| RN0120 |        | 0.18ad | 0.37ad | 0.43ad |        | 0      | 0      | 0.17cd | 0.33cd | 0      | 0.17ad | 0.13ad | 0     |
| RN0130 | 35737  | 0      | 0      | 0      | 0      | 0      | 0      | 0.11cd | 0      | 0      | 0      | 0.07ad | 0     |
| RN0140 |        | 0      | 0      | 0      | 0      | 0      | 0      | 0      | 0      | 0      | 0      | 0      | 0     |
| RN0150 | 1059   | 0      | 0      | 0      | 0      | 0      | 0      | 0.06cd | 0      | 0      | 0      | 0.07ad | 0     |
| RN0160 |        |        | 0.75cd | 0.43ad | 0.69ad | 1.51ad | 1.06ad | 0.34cd | 0.33cd | 0      | 0      | 0.13cd | 0     |
| RN0170 | 1201   | 0      | 0      | 0.43ad | 0.12ad | 0      | 0      | 0.06cd | 0.33cd | 0      | 0      | 0.07ad | 0     |
| RN0180 | 1203   | 0      | 0.37cd | 0      | 0.06ad | 0      | 0      | 0      | 0.08cd | 0      | 0      | 0      | 0.2ad |
| RN0190 | 96346  |        | 1.12cd | 0.43ad | 0.23ad |        | 0      | 0.11cd | 0.9cd  | 0.58cd | 0.34cd | 0.66cd | 0.2ad |
| RN0200 | 388    |        | 1.49cd |        |        | 0.5cd  | 0      |        | 1.31cd | 0      | 0.17cd | 0.66cd | 0     |
| RN0210 |        | 0.45ad | 0      | 0.43ad | 0.17ad | 0      | 0      |        | 0.9cd  |        | 0.17cd | 0.66ad | 0     |
| RN0220 | 53035  | 0.18ad | 0      | 0      | 0.06ad | 0.25ad | 0      | 0      | 0.33cd | 0      | 0.17ad |        | 0     |
| RN0230 | 2924   | 0.18ad | 0      | 0.22ad | 0.17ad | 0      | 0      | 0.06cd | 0.25cd | 0      | 0      | 0.07ad | 0.2ad |
| RN0240 | 2138   | 0      | 0      | 0      | 0      | 0      | 0      | 0      | 0      | 0      | 0      | 0      | 0     |
| RN0250 | 1309   | 0.18ad | 0      | 0.65ad | 0.06ad | 0      | 0      | 0.06ad | 0.16cd | 0      | 0      | 0      | 0.2ad |
| RN0260 | 294975 | 0      | 0      | 0      | 0.06cd | 0      | 0      | 0.06cd | 0.33cd | 0      | 0      | 0.07cd | 0     |
| RN0270 | 3181   | 0      | 0.37cd | 0      | 0      | 0      | 0      | 0      | 0.08cd | 0      | 0      | 0      | 0     |
| RN0280 | 950    | 0      | 0      | 0      | 0.06ad | 0      | 0      | 0      | 0      | 0      | 0      | 0      | 0     |
| RN0290 |        | 0.09cd | 0      | 0      | 0      | 0.25ad | 0      | 0      | 0      | 0      | 0      | 0      | 0     |
| RN0300 | 3027   | 0      | 0      | 0      | 0      | 0      | 0      | 0.06cd | 0.08cd | 0      | 0      |        | 0.2cd |
| RN0310 | 2345   | 0.09ad | 0      |        | 0.06ad | 0.25ad | 0      | 0.11cd | 0.25cd | 0      | 0      |        | 0     |
| RN0320 | 2368   | 0.18ad | 0      | 0.43cd | 0.29ad | 0      | 0      | 0      | 0      | 0      | 0      | 0      | 0     |
| RN0330 | 98249  | 1.43ad |        | 1.08ad | 5.54ad | 1.76ad | 2.12ad |        |        | 1.16ad | 0.17ad | 1.25ad | 0.4ad |
| RN0340 | 974    | 0      | 0      | 0      | 0.06ad | 0      | 0      | 0.11cd | 0      | 0      | 0      | 0      | 0     |

|        |      |        |         |        |        |        |        |         |         |        |        |        |        |
|--------|------|--------|---------|--------|--------|--------|--------|---------|---------|--------|--------|--------|--------|
| RN0350 | 192  | 0      | 0       | 0      | 0      | 0      | 0      | 0.11cd  | 0       | 0      | 0      | 0      | 0      |
| RN0360 | 1465 | 0      | 0       | 0      | 0.17ad | 0      | 0      |         |         | 0      | 0      | 0      | 0      |
| RN0370 | 239  | 0      | 0       | 0      | 0      | 0      | 0      | 0       | 0       | 0.58cd | 0      | 0      | 0      |
| RN0380 | 3255 | 0      | 0       | 0      | 0.06ad | 0      | 0      | 0       | 0       | 0      | 0      | 0      | 0.2ad  |
| RN0390 | 380  | 0.09ad | 0       | 0      | 0      | 0.25ad | 0      | 0       | 0       | 0      | 0      | 0.07ad | 0      |
| RN0400 | 1540 | 0      | 0.75cd  | 0      | 0      | 0      | 0      | 0       | 0       | 0      | 0.17ad | 0      | 0      |
| RN0410 | 2311 | 0      | 0       | 0      | 0.12ad | 0      | 0      | 0       | 0.16cd  | 0      | 0      | 0      | 0.2cd  |
| RN0430 | 2911 |        | 0.75cd  | 0.22ad |        |        | 0      | 1.83cd  | 1.39cd  | 0.58cd |        |        |        |
| RN0470 | 669  | 0      | 0       | 0      | 0.06ad | 0      | 0      | 0.17cd  | 0       | 0      | 0      | 0      | 0      |
| RN0480 | 3377 | 0      | 0       | 0      | 0      | 0      | 0      | 0.06cd  | 0       | 0      | 0      | 0      | 0      |
| RN0500 |      | 0      | 0       | 0      | 0.06ad | 0      | 0      | 0       | 0       | 0      | 0      | 0      | 0      |
| RN0510 | 464  | 0.09ad | 0       | 0      |        | 0      | 0      | 0.11cd  | 0.08cd  | 0      | 0      | 0.07ad | 0      |
| RN0520 | 910  | 0      | 0       | 0      | 0      | 0      | 0      |         | 0       | 0      | 0      | 0.07ad | 0      |
| RN0530 |      | 0.09ad | 0       | 0      | 0.06ad | 0      | 0      | 0       | 0       | 0      | 0      | 0      | 0      |
| RN0540 | 1556 | 0      | 0       | 0      | 0      | 0      | 0      | 0.06cd  | 0       | 0      | 0.17ad | 0      | 0      |
| RN0550 | 218  | 1.34ad | 0.37cd  | 0.43ad | 0.23ad | 0.5ad  | 0      | 0.23cd  | 0.9cd   | 0      | 0.34ad | 0.4ad  | 0.4ad  |
| RN0560 | 1775 | 0      | 0       | 0.22ad | 0      | 0      | 0      | 0       | 0       | 0      | 0      | 0.07ad | 0      |
| RN0570 |      | 0.27ad |         | 0      | 0.35ad | 0.5ad  | 1.06ad |         | 2.21cd  | 1.16cd |        | 0.72ad | 0      |
| RN0580 | 316  | 0      | 0       | 0      | 0      | 0      | 0      | 0       | 0       | 0      | 0      | 0      | 0.2ad  |
| RN0590 | 317  | 0.09ad | 0       | 0      | 0      | 0      | 0      | 0       | 0       | 0      | 0      | 0      | 0      |
| RN0600 | 312  | 0      | 0.37cd  | 0      | 0.12ad | 0      | 0      | 0.11cd  | 0.16cd  | 0      | 0      | 0.07cd | 0      |
| RN0610 | 2092 | 0      | 0       | 0.22ad | 0.06ad | 0      | 0      | 0       | 0       | 0      | 0      | 0      | 0      |
| RN0620 | 2796 | 0      | 0       | 0      | 0      | 0      | 0      | 0.06cd  | 0.16cd  | 0      | 0      | 0      | 0      |
| RN0630 | 758  | 0.54ad | 0.75cd  | 0.65ad | 0.52ad | 0.25ad | 1.06ad |         |         | 0.58ad | 0      | 0.2ad  | 0.4ad  |
| RN0640 | 1114 | 0.09ad | 0       | 0      | 0.12ad | 0      | 0      | 0       | 0       | 0      | 0      | 0      | 0      |
| RN0650 | 1214 | 0.18ad | 0       | 0      | 0      |        | 0      | 0.17cd  | 0       | 0      | 0.17cd | 0.07cd | 0      |
| RN0660 | 870  | 3.39ad | 17.18cd | 6.45ad |        | 3.52ad | 2.12cd | 42.85cd | 13.24cd | 4.62cd |        | 4.35ad | 2.42ad |
| RN0670 | 281  | 0.27ad | 0       | 0      | 0.12ad | 0.25ad | 0      | 0.34cd  | 0.33cd  | 0      | 0      | 0.07ad | 0      |
| RN0680 | 881  |        | 5.98cd  |        | 1.39ad | 1.01ad | 0      | 8.91cd  | 5.31cd  |        |        | 0.86ad |        |
| RN0690 |      | 3.66ad | 8.22cd  |        | 2.77ad |        |        | 5.49cd  | 4.09cd  | 1.73ad |        |        |        |
| RN0700 | 280  | 0.09ad | 0       | 0      | 0.06ad | 0      | 0      | 0.51cd  | 0.33cd  | 0      | 0.17ad | 0      | 0      |
| RN0710 | 550  | 2.05ad | 0.37ad  | 0.86ad | 0.87ad | 0.25ad | 0      |         |         | 0      |        | 0.33ad | 0.4ad  |
| RN0720 | 551  | 0.09ad | 0       | 0      | 0.23ad | 0      | 0      | 0       | 0.08cd  | 0      | 0      | 0      | 0.2ad  |
| RN0740 |      | 0      | 0       | 0      | 0.12cd | 0      | 0      | 0       | 0       | 0      | 0      | 0      | 0      |
| RN0750 | 805  | 1.16ad |         | 2.15ad | 0.23ad | 1.26ad | 2.12ad | 2.46cd  | 1.88cd  | 0      |        |        |        |
| RN0760 | 2869 | 0.09ad | 1.12cd  | 0      | 0.4ad  | 0      | 0      | 0.11cd  | 0.25cd  | 0      | 0.17ad | 0.07ad | 0      |
| RN0770 | 3205 |        | 0       | 0      | 0.06ad | 0.25ad | 0      |         | 0.16cd  | 0      | 0.17cd |        | 0      |

|        |        |        |        |        |        |        |        |        |        |        |        |        |       |
|--------|--------|--------|--------|--------|--------|--------|--------|--------|--------|--------|--------|--------|-------|
| RN0780 | 892    |        | 1.12cd | 0.22ad | 0.23ad | 0.25ad | 0      |        | 0.25cd | 0      | 0      | 0      | 0     |
| RN0790 | 915    | 0.27ad | 0.37cd | 0      | 0      | 0.25ad | 0      |        | 0      | 0      | 0      | 0.07ad | 0     |
| RN0800 | 83     | 0.09ad | 0      | 0      | 0      | 0      | 0      | 0      | 0      | 0      | 0      | 0      | 0     |
| RN0810 | 1225   | 0      | 0      | 0      | 0      | 0      | 0      | 0      | 0.08ad | 0      | 0      | 0      | 0     |
| RN0820 | 116?   | 0.36ad | 1.87cd | 0.65ad | 0.35ad | 0.25ad | 1.06ad | 3.14cd | 0.65cd | 0      | 0      | 0.26ad | 0.2ad |
| RN0830 | 125    | 0      | 0      | 0      | 0      | 0      | 0      | 0.06cd | 0      | 0      | 0      | 0      | 0     |
| RN0850 | 138    |        | 0      | 0      | 0.06ad | 0.5ad  | 0      | 1.37cd | 0.25ad | 0      | 0      | 0.07ad | 0     |
| RN0860 | 3157   | 0.09ad | 0      | 0      | 0.12ad | 0      | 0      | 0      | 0.41cd | 0      | 0.17cd | 0      | 0     |
| RN0870 | 235    | 0      | 0      | 0      | 0      | 0      | 0      | 0.29cd | 0      | 0      | 0      | 0      | 0     |
| RN0880 | 1896   | 0.18ad | 0      | 0      | 0.35ad | 0.25cd | 0      |        |        | 0.58ad | 0.17ad | 0.07ad | 0.2ad |
| RN0890 | 2053   | 0      | 0      | 0      | 0      | 0      | 0      | 0.06ad | 0.08cd | 0      | 0      | 0      | 0     |
| RN0900 | 2059   | 0      | 0      | 0      | 0      | 0      | 0      | 0      | 0      | 0      | 0      | 0      | 0     |
| RN0910 | 374    |        | 0.37cd | 0.22cd |        | 0.5ad  | 0      | 1.09cd | 0.41cd | 0      |        |        |       |
| RN0930 | 392    | 0      | 0      | 0.22ad | 0      | 0      | 0      | 0.23cd | 0.08cd | 0      | 0      | 0.13ad | 0     |
| RN0940 | 2322   | 0.18ad | 0.37cd | 0.22ad | 0.23ad | 0      | 1.06ad | 1.37cd | 0.25cd | 0.58cd | 0.17cd |        | 0     |
| RN0950 | 98861  | 0.09ad |        | 0      | 0.17ad | 0.25ad | 0      |        | 1.06cd | 0      | 0.85ad | 0.26ad |       |
| RN0960 | 163634 | 0.09ad | 0      | 0.22cd | 0      | 0      | 0      | 0.06cd | 0      | 0      | 0      | 0      | 0     |
| RN0970 | 560    | 0.09ad | 0      | 0      | 0      | 0      | 0      | 0      | 0      | 0      | 0      | 0      | 0     |
| RN0980 | 564    | 0      | 0      | 0      | 0      | 0      | 0      | 0      | 0.08cd | 0      | 0      | 0      | 0     |
| RN0990 | 570    | 0      | 0      | 0.22cd | 0.17ad | 0      | 1.06ad | 0.4cd  | 0.41cd | 0      | 0      | 0.13ad | 0     |
| RN1000 | 245    | 0      | 0      | 0      | 0      | 0      | 0      | 0      | 0      | 0      | 0      | 0      | 0     |
| RN1010 | 648    | 0.36ad | 1.12cd |        | 0.98ad | 0.75ad | 0      | 3.09cd |        |        |        | 0.66ad | 0.2ad |
| RN1020 |        | 0      | 0      | 0      | 0.12ad | 0.25ad | 0      |        | 0      | 0      | 0      | 0      | 0.2ad |
| RN1040 | 710    | 0      | 0      | 0      | 0      | 0      | 0      | 0.17cd | 0      | 0      | 0      | 0      | 0     |
| RN1070 | 97360  | 0      | 0      | 0      | 0      | 0      | 0      | 0      | 0      | 0      | 0      | 0      | 0     |
| RN1080 | 813    | 0.18ad | 0.75cd | 0      |        | 0.25ad | 0      | 1.03cd | 0.49cd | 0      | 0.17cd |        | 0     |
| RN1100 | 808    | 0      | 0      | 0      | 0      | 0      | 0      | 0.11cd | 0      | 0      | 0      | 0      | 0     |
| RN1120 |        | 0      | 0      | 0      | 0      | 0      | 0      | 0.06cd | 0.08cd | 0      | 0      | 0      | 0     |
| RN1130 | 1297   | 0      | 0      | 0      | 0.06ad | 0      | 0      | 0.06cd | 0      | 0      | 0.17ad | 0      | 0     |
| RN1140 | 107    | 0      | 0      | 0.22ad | 0.12ad | 0      | 0      | 0.17cd |        | 0      | 0      | 0.07ad | 0     |
| RN1150 | 1340   | 0.09ad | 0      | 0      | 0.06ad | 0      | 0      | 0.46cd |        | 0      | 0.17ad |        | 0.2ad |
| RN1170 | 744    | 0      | 0      | 0      | 0.12ad | 0      | 0      | 0.34cd | 0.16cd | 0      | 0      | 0      | 0     |
| RN1180 | 324764 | 0.27cd | 0      | 0.43ad | 0.17ad | 0      | 0      | 0.46cd | 0.16cd | 0      | 0      | 0.07ad | 0     |
| RN1190 | 2614   | 0.18ad | 1.49cd | 0      | 0      | 0      | 0      | 0      | 0.33cd | 0      | 0      |        | 0     |
| RN1200 |        | 0      | 0      | 0      | 0      | 0.25ad | 0      | 0      | 0.33cd | 0      | 0      | 0      | 0     |
| RN1210 | 819    | 0      | 0.75cd | 0.22ad | 0.17ad | 0      | 0      |        | 0.08cd | 0      | 0.17ad | 0.13ad | 0.2ad |
| RN1220 | 828    | 0      | 0.75cd | 0.43ad | 0.12ad | 0.25ad | 0      | 0.11cd | 0.33cd | 0      | 0.17ad | 0      | 0     |

|        |        |        |        |        |        |        |        |        |        |        |        |        |        |
|--------|--------|--------|--------|--------|--------|--------|--------|--------|--------|--------|--------|--------|--------|
| RN1240 | 857    | 0      | 0      | 0      | 0.06ad | 0      | 0      | 0      | 0      | 0      | 0      | 0      | 0      |
| RN1250 | 887    | 0.09cd | 0      | 0      |        | 0      | 0      | 0.34cd | 0.41cd | 0      | 0.17ad | 0.13ad | 0      |
| RN1270 | 904    | 0.63ad | 0      | 0.22ad | 0.23ad | 0.25ad | 0      | 3.94cd | 1.31cd | 0.58ad |        | 0.59ad | 0      |
| RN1280 | 3460   | 0      | 0      | 0      | 0      | 0      | 0      | 0      | 0      | 0      | 0      | 0      | 0      |
| RN1290 | 3463   | 0.09ad | 0      | 0      | 0.06cd | 0      | 0      | 0.23cd | 0.08cd | 0      | 0      | 0      | 0.2cd  |
| RN1300 | 72     | 0.54ad | 0      | 0.22ad | 0.23ad | 0      | 1.06ad | 0.69cd | 0.9cd  | 0.58cd | 0      |        | 0.2ad  |
| RN1310 | 739    | 0.18ad |        | 0      | 0.35ad |        | 0      |        | 1.64cd | 0.58cd |        |        | 0.81ad |
| RN1320 | 558    | 3.48ad | 1.87cd | 0.86ad | 2.94ad |        | 0      |        |        | 1.73ad |        | 1.32ad | 0.4ad  |
| RN1330 | 908    | 2.14ad | 1.12ad |        | 0.46ad | 1.26ad | 1.06ad |        | 1.31cd | 0.58ad | 0.51ad | 1.05ad | 0.81ad |
| RN1350 |        | 0.09ad | 0.37ad | 0      | 0      | 0.25ad | 1.06cd | 0.29cd | 0      | 0      | 0      | 0.2ad  | 0.2ad  |
| RN1360 | 63     | 0.63ad |        |        | 0.29ad | 0.75ad | 0      |        | 1.06cd | 0      | 0.68ad | 0.26ad | 0.4ad  |
| RN1370 | 64     | 0.09ad | 0      | 0      | 0      | 0      | 0      | 0.11cd | 0      | 0      | 0      | 0      | 0      |
| RN1380 | 110    | 0.18ad | 0.37ad | 0      | 0.12ad | 0      | 0      | 0.17cd |        | 0      | 0      | 0.07ad | 0      |
| RN1410 | 199    | 0.18ad | 0      | 0.22ad | 0.12ad | 0.75ad | 1.06ad | 0.57cd | 0.16cd | 0      | 0.17ad | 0.07ad | 0      |
| RN1430 | 220    | 0      | 0      | 0      | 0      | 0      | 0      | 0      | 0.16cd | 0      | 0      | 0      | 0      |
| RN1440 | 2710   | 0      | 0      | 0      | 0      | 0      | 0      | 0      | 0.08cd | 0      | 0      | 0      | 0      |
| RN1450 | 94068  | 0      | 0      | 0.22ad | 0.12ad | 0      | 0      | 0.17cd | 0.16cd | 0.58cd | 0.17ad | 0      | 0      |
| RN1460 | 2052   | 0      | 0      | 0      | 0      | 0      | 0      | 0      | 0      | 0      | 0      | 0      | 0      |
| RN1480 | 435    | 0.27ad | 0      | 0      | 0.06ad | 0      | 0      | 0.29cd | 0.16cd | 0      | 0      | 0.07ad | 0      |
| RN1490 |        | 0      | 0      | 0      | 0.06ad | 0      | 1.06ad | 0.06ad | 0.08ad | 0      | 0      | 0      | 0      |
| RN1500 | 477    | 0      | 0      | 0      | 0      | 0.25ad | 0      | 0      | 0      | 0      | 0      | 0      | 0      |
| RN1510 | 90308  |        | 0      | 0.43ad | 0.17ad | 0.25ad | 0      | 1.66cd | 0.41cd | 0      | 0      | 0.07ad | 0.2cd  |
| RN1520 | 98818  | 0      | 0      | 0      | 0      | 0      | 0      | 0.06cd | 0      | 0      | 0      | 0      | 0      |
| RN1530 | 500    | 0      | 0      | 0      | 0      | 0      | 0      | 0.17cd | 0      | 0      | 0.17ad | 0.2ad  | 0      |
| RN1570 | 263440 | 0      | 0      | 0      | 0.06ad | 0      | 0      | 0      | 0      | 0      | 0      | 0      | 0      |
| RN1580 | 649    | 0      | 0      | 0      | 0.06ad | 0      | 0      | 0      | 0      | 0      | 0      | 0      | 0      |
| RN1590 | 884    | 0      | 0      | 0      | 0      | 0      | 0      | 0.17cd | 0.08cd | 0      | 0      | 0      | 0      |
| RN1600 | 699    | 0      | 0      | 0      | 0      | 0      | 0      | 0      | 0      | 0      | 0      | 0      | 0      |
| RN1610 | 2905   | 0      | 0      | 0      | 0      | 0      | 0      | 0      | 0.08ad | 0      | 0      | 0      | 0      |
| RN1620 | 783    | 0      | 0      | 0.22ad | 0.12ad | 0      | 0      | 0.57cd | 0.57cd | 0      | 0      | 0      | 0      |
| RN1640 | 1466   | 0      | 0      | 0      | 0      | 0      | 0      | 0.06cd | 0      | 0      | 0      | 0      | 0      |
| RN1650 | 404560 | 2.86ad | 0      | 0      | 0.29ad | 0.25ad | 0      | 0      | 0      | 0      | 0      | 0      | 0      |
| RN1660 | 35125  | 0.09ad | 0      | 0      | 0.06ad | 0      | 0      | 0      | 0.08ad | 0      | 0.17ad | 0      | 0      |
| RN1670 |        | 0      | 0.37cd | 0      | 0.06ad | 0      | 0      | 0      | 0      | 0      | 0      | 0.07ad | 0      |
| RN1680 | 3352   | 0      | 0      | 0      | 0      | 0      | 0      | 0.06cd | 0      | 0      | 0      | 0      | 0      |
| RN1690 |        | 0      | 0      | 0      | 0      | 0      | 0      | 0      | 0      | 0      | 0.17cd | 0      | 0      |
| RN1700 | 816    | 0.09ad | 0      | 0      | 0      | 1.01ad | 0      | 0.06cd | 1.8cd  | 0      | 0.51ad | 0.2ad  | 0      |



|        |        |         |          |         |         |         |        |         |         |        |        |         |        |
|--------|--------|---------|----------|---------|---------|---------|--------|---------|---------|--------|--------|---------|--------|
| RN1720 | 3437   | 0.54ad  | 0        | 0.22ad  | 0.23ad  | 0.25ad  | 0      | 0.06cd  | 0.08ad  | 0      | 0.34ad | 0       | 0.2ad  |
| RN1750 | 3449   | 0       | 0        | 0       | 0       | 0.25ad  | 0      | 0.06cd  | 0.08cd  | 0      | 0      | 0       | 0      |
| RN1760 | 912    | 0       | 0        | 0       | 0.06ad  | 0       | 0      | 0.17cd  | 0       | 0      | 0      |         | 0      |
| RP0010 | 290    | 0       | 0        | 0       | 0       | 0       | 0      | 1.71cd  | 0.08cd  | 0      | 0      | 0       | 0      |
| RP0040 | 1915   | 0       | 1.49ad   | 0       | 0.87ad  | 0.25ad  | 1.06ad |         |         | 0      | 0      | 0.07ad  | 0      |
| RP0050 | 70590  | 0.09ad  | 0        | 0       | 0.06ad  | 0       | 1.06cd | 0       | 10.79cd | 1.16cd | 0.17cd | 0       | 0      |
| RP0060 | 415286 | 0       | 0        | 0       | 0       | 0       | 0      | 0.06cd  | 0       | 0      | 0      | 0       | 0      |
| RP0070 |        | 0       | 0        | 0       | 0       | 0       | 0      | 0       | 0       | 0      | 0      | 0.07ad  | 0      |
| RN0460 | 1988   | 0       | 0        | 0       | 0       | 0       | 0      | 0       | 0.08cd  | 0      | 0      | 0       | 0      |
| RN0730 | 3163   | 0.09ad  | 0        | 0       | 0       | 0       | 0      | 0       | 0       | 0      | 0      | 0       | 0      |
| RN1090 | 798    | 0       | 0        | 0       | 0       | 0       | 0      | 0.06cd  | 0       | 0      | 0      | 0       | 0      |
| RN1110 |        | 0       | 0        | 0       | 0       | 0       | 0      | 0       | 0       | 0      | 0      | 0       | 0      |
| RN1160 | 1647   | 0       | 0        | 0       | 0       | 0       | 0      | 0       | 0.08cd  | 0      | 0      | 0       | 0      |
| RN1630 | 36     | 0       | 0        | 0       | 0       | 0       | 0      | 0.06cd  | 0       | 0      | 0      | 0       | 0      |
| RP0020 | 1906   | 0       | 0        | 0       | 0       | 0       | 0      | 0       | 0.08cd  | 0      | 0      | 0       | 0      |
| RP0030 | 1912   | 0       | 0        | 0       | 0       | 0       | 0      | 0       | 0.08cd  | 0      | 0      | 0       | 0      |
| RBG010 |        | 5.45ad  | 11.95cd  |         | 4.97ad  |         |        | 30.17cd | 15.94cd |        |        | 5ad     | 5.44ad |
| RCG010 |        | 2.23ad  |          |         |         | 0.25ad  | 2.12cd | 0.57cd  | 3.11cd  | 1.16ad | 0.68ad |         | 0      |
| RCG020 |        |         | 10.46cd  |         | 2.19ad  |         | 1.06ad | 2.51cd  | 4.82cd  |        |        |         | 1.01ad |
| RCG030 |        |         | 15.31cd  | 0.43ad  |         |         | 1.06cd | 1.94cd  | 6.79cd  |        | 1.18cd | 0.33ad  |        |
| RCG040 |        |         |          |         | 3.75ad  | 5.03ad  |        | 16.8cd  | 29.27cd |        |        |         | 0.2cd  |
| RCG050 |        |         | 1.87ad   | 0       | 0.4ad   | 0       | 0      | 0.17cd  | 0.74cd  | 0.58cd | 0.17cd | 0.07cd  |        |
| RCG060 |        |         | 0.37cd   |         | 1.56ad  | 1.26ad  | 0      |         | 3.19cd  | 1.16ad |        | 0.99ad  |        |
| RCG070 |        | 1.07ad  |          |         | 0.81ad  |         | 1.06ad |         |         |        | 0.34ad | 0.66ad  |        |
| RCG080 |        | 0.98ad  |          | 1.94ad  | 1.62ad  | 1.76ad  | 2.12cd | 3.43cd  |         |        | 1.69ad |         | 0      |
| RCG090 |        | 0.09ad  | 0        | 0       | 0       | 0       | 0      | 0.11cd  | 0.08cd  | 0      | 0      | 0.13ad  | 0      |
| RCG100 |        | 5.09ad  | 10.46cd  | 9.46ad  | 7.74ad  | 7.54ad  | 6.37ad |         | 8.83cd  | 6.35ad | 0      |         |        |
| RCG110 |        |         | 0.37cd   |         | 0.98ad  | 0       | 0      | 0.17ad  |         | 0      | 0      |         | 0.2ad  |
| RCG120 |        | 0.09cd  | 0        | 0       | 0       | 0       | 0      | 0.06cd  | 0.25cd  | 0      | 0      | 0       | 0      |
| RCG130 |        | 3.66ad  |          | 1.94ad  | 1.56ad  |         | 0      |         |         | 0      | 0.85ad | 0.92ad  | 0.6ad  |
| RCG140 |        | 0       | 0        | 0       |         | 0       | 0      | 0.97cd  |         | 0      |        | 0.13ad  | 0      |
| RCG150 |        | 2.14ad  |          | 1.94ad  |         |         | 2.12ad |         | 0.98cd  | 2.89ad |        | 0.99ad  |        |
| RCG160 |        | 15.63ad |          |         |         |         |        | 8.23cd  | 8.09cd  |        |        |         |        |
| RDG010 |        |         | 49.3cd   | 6.88ad  | 11.03ad | 7.54ad  |        | 14.46cd | 41.37cd |        |        |         |        |
| RDG020 |        | 6.61ad  | 107.93cd | 27.32ad | 36.32ad | 26.65ad |        | 9.83cd  | 50.44cd |        | 3.55ad | 49.32ad | 1.21ad |
| RDG030 |        | 0.09ad  | 4.48cd   | 0       | 0.12ad  | 0.25ad  | 0      | 1.71cd  | 0.41cd  | 0.58ad | 0.17cd | 0.07ad  | 0      |
| RDG040 |        | 0       | 3.36cd   | 0.22ad  | 0       | 0.25cd  | 0      | 0       | 2.78cd  | 0.58ad | 0.17ad | 0       | 0      |

|        |         |         |        |         |        |        |         |         |        |        |         |        |
|--------|---------|---------|--------|---------|--------|--------|---------|---------|--------|--------|---------|--------|
| RFG010 | 0.36ad  | 0.37ad  | 0.65ad |         | 0      | 1.06ad | 0.63cd  |         | 0      | 0.34ad | 0.26ad  |        |
| RFG020 | 0.09ad  | 0.37ad  |        | 0.23ad  | 0      | 1.06ad | 0       | 0       | 0      | 0      |         | 0      |
| RFG030 | 0       | 0       | 0.22ad | 0.12ad  | 0      | 0      | 0.17cd  | 0.41cd  | 0      | 0      | 0.07cd  | 0      |
| RFG040 |         |         | 5.16ad |         |        |        | 24.97cd |         |        |        |         |        |
| RFG050 | 1.07ad  |         | 1.08ad | 2.37ad  | 1.76ad | 1.06ad |         |         | 0.58ad |        |         |        |
| RFG060 | 7.59ad  |         |        |         |        | 5.31cd | 13.14cd | 8.5cd   |        |        |         |        |
| RFG070 | 2.59ad  |         | 1.29ad | 1.04ad  |        | 1.06ad |         |         | 0.58cd |        |         | 2.21ad |
| RFG080 | 6.88ad  | 4.48ad  |        | 5.6ad   |        |        | 33.54cd |         |        |        |         | 1.61ad |
| RFG090 | 3.84ad  |         | 8.6ad  | 3.75ad  | 2.51ad | 1.06ad | 13.71cd | 4.91cd  | 2.31cd |        | 0.66ad  | 1.81ad |
| RFG100 | 0.36ad  | 0.37ad  | 0      |         | 0.5ad  | 0      | 0.17cd  | 0       | 0.58cd | 0.17ad | 0.07ad  | 0.4ad  |
| RFG110 | 15.99ad |         |        |         |        |        |         |         |        |        |         |        |
| RFG120 | 0.54ad  |         | 0      | 0.29cd  |        | 1.06cd | 1.37cd  | 0.25cd  |        | 0.34ad |         | 0.2cd  |
| RFG130 | 0       | 0.75cd  | 0.22ad | 0.29ad  | 0      | 0      | 0.11ad  | 0.65cd  | 0      | 0      | 0       | 0      |
| RFG140 | 0.98ad  |         | 0      | 1.15ad  | 0.5ad  | 0      |         | 1.88cd  | 0      | 0      | 0.13ad  | 0.2ad  |
| RGG010 | 0.71ad  | 3.73cd  | 0.65ad | 0.92ad  |        | 1.06ad | 0       | 2.86cd  | 2.31ad | 0.34ad | 0.4ad   | 0.6ad  |
| RMG010 | 13.22ad | 30.25cd | 7.74ad | 16.74ad |        |        |         | 22.89cd |        |        | 12.58ad | 1.81cd |
| RNG010 | 0.45ad  | 0.37cd  | 0.65cd | 0.64ad  | 1.26ad | 0      |         |         | 0      | 0.17cd | 0.07ad  | 0.2ad  |
| RNG020 | 0.09ad  | 0.75cd  | 0.43ad |         | 0.5ad  | 0      | 0       | 0.16cd  | 0      | 0      | 0.07cd  |        |
| RNG030 | 0.09ad  | 0       | 0      | 0.06ad  | 0      | 0      | 0.17cd  | 0       | 0      | 0      | 0       | 0      |
| RNG040 |         |         |        | 2.71ad  |        | 3.19ad |         |         | 0      |        |         | 2.82ad |
| RNG050 |         | 4.85cd  |        |         |        | 2.12cd | 3.89cd  | 2.37cd  | 2.31cd |        |         |        |
| RNG060 |         |         | 0      |         |        |        |         |         | 1.73ad |        |         | 0.6cd  |
| RNG070 |         | 1.12cd  |        | 0.92ad  | 0.5ad  | 2.12cd |         | 6.62cd  |        |        | 1.58ad  | 0.4ad  |
| RNG080 | 0.98ad  | 1.12cd  | 0      |         | 0.25ad | 1.06ad | 6.34cd  | 1.64cd  | 0.58cd | 0      | 0.46ad  | 0.2ad  |
| RNG090 | 5.89ad  |         | 4.52ad | 4.1ad   | 3.52ad |        | 19.48cd | 11.45cd |        | 3.72ad | 8.96ad  | 2.42ad |
| RNG100 | 6.61ad  |         | 1.94ad | 5.31ad  | 3.02ad | 3.19ad |         |         |        | 1.86ad | 4.35ad  |        |
