# Supplementary material for: The Occurrence of 275 Rare Diseases and 47 Rare Disease Groups in Italy. Results from the National Registry of Rare Diseases
Source: MDPI journal article supplement (doi:10.3390/ijerph15071470), 2018-07-12
Supplement: s1 [file s1]

**Table S5. Age at onset of rare diseases reported to RNMR**

**Record source:** Subset 1; **Notifying regions:** all; **Record selection:** records with diagnosis indicating a specific disease (i.e.: excluding disease groups) and at least 4 records with valid onset date per disease; **Total records:** 84859.

**Note:** This table reports pathologies ordered by increasing median age at onset. The number of records is indicated with the only aim of allowing a better assessment of the statistical data presented and cannot be used as an indication of the disease or exemption code frequency.

| RNMR<br>Code | ORPHA<br>Code | Disease                              | Records<br>(N) | Median         | Minimum<br>age (years) | Maximum<br>age (years) | Life stages or age ranges of usual disease<br>onset reported by ORPHANET data sheets<br>[24], if not otherwise referenced |
|--------------|---------------|--------------------------------------|----------------|----------------|------------------------|------------------------|---------------------------------------------------------------------------------------------------------------------------|
|              |               |                                      |                | age<br>(years) |                        |                        |                                                                                                                           |
| RNG040       | 1791          | Frontofacionasal dysplasia           | 7              | -0.28          | -0.39                  | 0.00                   | Neonatal                                                                                                                  |
| RN0490       | 3447          | Weaver syndrome                      | 7              | -0.23          | -0.39                  | -0.04                  | Neonatal, Antenatal                                                                                                       |
| RNG030       | 87            | Apert syndrome                       | 13             | -0.18          | -0.48                  | 0.75                   | Antenatal, Neonatal                                                                                                       |
| RNG040       | 2108          | Hallermann-Streiff syndrome          | 9              | -0.17          | -0.48                  | 1.40                   | Neonatal, Infancy                                                                                                         |
| RP0040       | 1915          | Fetal alcohol syndrome               | 56             | -0.14          | -0.47                  | 13.96                  | Antenatal, Neonatal                                                                                                       |
| RNG040       |               | Oculomaxillofacial dysostosis        | 20             | -0.11          | -0.47                  | 4.85                   |                                                                                                                           |
| RI0070       | 2290          | Microvillus inclusion disease (MVID) | 6              | -0.11          | -0.35                  | 0.04                   |                                                                                                                           |
| RNG070       | 313           | Lamellar ichthyosis                  | 60             | -0.11          | -0.49                  | 5.73                   | Neonatal                                                                                                                  |
| RN0400       | 1540          | Jackson-Weiss syndrome               | 12             | -0.10          | -0.46                  | 0.13                   | Neonatal                                                                                                                  |
| RNG040       | 207           | Crouzon disease                      | 43             | -0.09          | -0.49                  | 43.43                  | Infancy, Neonatal                                                                                                         |
| RN0530       |               | Keratosis follicularis spinulosa dec | 6              | -0.07          | -0.39                  | 2.70                   |                                                                                                                           |
| RNG040       |               | Pierre Robin syndrome                | 50             | -0.07          | -0.49                  | 1.16                   |                                                                                                                           |
| RN1150       | 1340          | Cardiofaciocutaneous syndrome        | 54             | -0.06          | -0.44                  | 3.63                   | Antenatal, Neonatal                                                                                                       |
| RN0640       | 1114          | Aplasia cutis congenita              | 14             | -0.06          | -0.35                  | 23.46                  | Antenatal, Neonatal                                                                                                       |
| RFG010       | 141           | Canavan disease                      | 6              | -0.06          | -0.14                  | 0.41                   | neonatal, infancy (severe form); childhood<br>(mild form)                                                                 |
| RNG040       | 1452          | Cleidocranial dysostosis             | 7              | -0.05          | -0.08                  | 9.93                   | Neonatal                                                                                                                  |
| RCG060       | 352           | Galactosemia                         | 58             | -0.05          | -0.48                  | 1.89                   | Infancy, Neonatal, Childhood                                                                                              |
| RN0130       | 35737         | Morning glory syndrome               | 10             | -0.05          | -0.08                  | 0.65                   | Childhood                                                                                                                 |

|        |        |                                    |     |       |       |       |                     |
|--------|--------|------------------------------------|-----|-------|-------|-------|---------------------|
| RN1670 |        | Multiple pterygium syndrome        | 6   | -0.05 | -0.43 | 8.79  |                     |
| RNG050 | 429    | Hypochondroplasia                  | 7   | -0.05 | -0.05 | 0.03  | Childhood           |
| RP0010 | 290    | Congenital rubella syndrome        | 31  | -0.05 | -0.08 | 0.00  | Antenatal, Neonatal |
| RN1020 |        | Opitz syndrome                     | 17  | -0.05 | -0.47 | 12.30 |                     |
| RN0390 | 380    | Greig cephalopolysyndactyly synd   | 15  | -0.04 | -0.48 | 1.92  | Neonatal            |
| RNG070 |        | Autosomal recessive congenital icl | 17  | -0.04 | -0.08 | 0.10  |                     |
| RDG020 | 326    | Factor V deficiency                | 24  | -0.04 | -0.06 | 38.84 | All ages            |
| RN0500 |        | Cutis laxa                         | 10  | -0.04 | -0.25 | 63.35 |                     |
| RN0090 |        | Axenfeld-Rieger anomaly            | 14  | -0.04 | -0.38 | 3.57  |                     |
| RN1200 |        | Smith-Lemli-Opitz syndrome type    | 29  | -0.04 | -0.47 | 25.20 |                     |
| RN0100 | 708    | Peters anomaly                     | 12  | -0.04 | -0.47 | 0.05  | Infancy, Neonatal   |
| RCG040 | 238583 | Hyperphenylalaninemia              | 673 | -0.04 | -0.08 | 0.04  | Neonatal, Infancy   |
| RN1040 | 710    | Pfeiffer syndrome                  | 10  | -0.03 | -0.49 | 0.13  | Antenatal, Neonatal |
| RN1530 | 500    | LEOPARD syndrome                   | 37  | -0.03 | -0.48 | 24.41 | Childhood           |
| RCG040 |        | Oculocutaneous albinism            | 131 | -0.03 | -0.49 | 36.64 |                     |
| RCG040 | 407    | Non-ketotic hyperglycinemia        | 6   | -0.03 | -0.06 | -0.01 | Infancy, Neonatal   |
| RCG060 | 348    | Fructose-1,6-bisphosphatase defic  | 4   | -0.03 | -0.05 | 2.68  | All ages            |
| RN0510 | 464    | Incontinentia pigmenti             | 74  | -0.03 | -0.45 | 34.94 | Neonatal            |
| RN1640 | 1466   | COFS syndrome                      | 6   | -0.03 | -0.17 | 1.48  | Neonatal, Antenatal |
| RC0030 |        | Reifenstein syndrome               | 28  | -0.03 | -0.42 | 54.33 |                     |
| RN1760 | 912    | Zellweger syndrome                 | 13  | -0.02 | -0.47 | 0.30  | Neonatal            |
| RCG040 |        | Tyrosinemia                        | 12  | -0.02 | -0.06 | 2.88  |                     |
| RNG070 | 461    | Recessive X-linked ichthyosis      | 60  | -0.02 | -0.48 | 9.98  | Neonatal            |
| RN0570 |        | Epidermolysis bullosa              | 302 | -0.02 | -0.49 | 80.16 |                     |
| RP0060 | 415286 | Bilirubin encephalopathy           | 7   | -0.02 | -0.34 | 0.28  | Neonatal            |
| RCG050 | 23     | Argininosuccinatelyase deficiency  | 12  | -0.02 | -0.07 | 3.98  | Neonatal, All ages  |
| RN0910 | 374    | Goldenhar syndrome                 | 187 | -0.02 | -0.49 | 32.29 | Neonatal, Antenatal |
| RN0600 | 312    | Epidermolytic ichthyosis           | 32  | -0.02 | -0.38 | 21.40 | Neonatal            |
| RN0190 | 96346  | Anorectal malformation             | 361 | -0.02 | -0.49 | 29.01 |                     |
| RDG020 | 327    | Factor VII deficiency              | 98  | -0.02 | -0.08 | 82.63 | All ages            |
| RN0990 | 570    | Moebius syndrome                   | 52  | -0.02 | -0.48 | 0.08  | Neonatal            |
| RN0320 | 2368   | Gastroschisis                      | 57  | -0.02 | -0.45 | 3.55  | Neonatal, Antenatal |
| RDG020 | 328    | Factor X deficiency                | 9   | -0.02 | -0.07 | 14.14 | All ages            |

|        |        |                                    |      |       |       |       |                                         |
|--------|--------|------------------------------------|------|-------|-------|-------|-----------------------------------------|
| RN0120 |        | Congenital colobomatous optic di   | 78   | -0.02 | -0.46 | 27.49 |                                         |
| RN0700 | 280    | Wolf-Hirschhorn syndrome           | 64   | -0.02 | -0.46 | 0.77  | Neonatal, Antenatal                     |
| RN0870 | 235    | Dubowitz syndrome                  | 8    | -0.02 | -0.20 | 1.75  |                                         |
| RN1080 | 813    | Silver-Russell syndrome            | 85   | -0.02 | -0.39 | 10.00 | Neonatal, Antenatal                     |
| RN0180 | 1203   | Duodenal atresia                   | 75   | -0.02 | -0.41 | 15.45 | Antenatal, Neonatal, Infancy, Childhood |
| RN1050 |        | Rieger syndrome                    | 9    | -0.02 | -0.18 | 8.68  |                                         |
| RN0540 | 1556   | Cutis marmorata telangiectatica ci | 21   | -0.02 | -0.44 | 26.77 | Neonatal                                |
| RCG040 | 511    | Maple syrup urine disease          | 26   | -0.02 | -0.48 | 6.93  | Infancy, Neonatal, Childhood            |
| RNG070 | 634    | Netherton syndrome                 | 17   | -0.01 | -0.38 | 0.05  | Infancy, Neonatal                       |
| RN1100 | 808    | Seckel syndrome                    | 11   | -0.01 | -0.30 | 1.41  | Neonatal, Antenatal                     |
| RN1310 | 739    | Prader-Willi syndrome              | 388  | -0.01 | -0.48 | 50.46 | Neonatal, Antenatal                     |
| RCG040 | 35     | Propionic acidemia                 | 4    | -0.01 | -0.02 | 0.00  | Infancy, Neonatal                       |
| RN0160 |        | Esophageal atresia and/or Isolatec | 242  | -0.01 | -0.49 | 8.98  |                                         |
| RN0080 | 1764   | Familial dysautonomia              | 6    | -0.01 | -0.24 | 65.98 | Neonatal, Antenatal                     |
| RN0740 |        | Ivemark syndrome                   | 4    | -0.01 | -0.03 | 0.00  |                                         |
| RDG020 | 331    | Factor XIII deficiency             | 5    | -0.01 | -0.07 | 3.85  | All ages                                |
| RN0850 | 138    | CHARGE syndrome                    | 116  | -0.01 | -0.49 | 40.33 | Neonatal                                |
| RCG040 | 293355 | Methylmalonic acidemia             | 11   | -0.01 | -0.07 | 2.09  | All ages                                |
| RN1170 | 744    | Proteus syndrome                   | 19   | -0.01 | -0.19 | 18.46 | Infancy                                 |
| RN0170 | 1201   | Atresia of small intestine         | 77   | -0.01 | -0.41 | 41.23 | Neonatal                                |
| RNG040 |        | Primary craniosynostosis           | 432  | -0.01 | -0.49 | 28.09 |                                         |
| RN1140 | 107    | Branchio-oto-renal syndrome        | 35   | -0.01 | -0.45 | 38.75 | All ages                                |
| RN0820 |        | Beckwith-Wiedemann syndrome        | 256  | -0.01 | -0.47 | 44.29 |                                         |
| RN1250 | 887    | VACTERL/VATER association          | 80   | -0.01 | -0.49 | 2.83  | Neonatal                                |
| RN0030 |        | Cerebellar agenesis                | 20   | -0.01 | -0.13 | 1.63  |                                         |
| RN1410 | 199    | Cornelia de Lange syndrome         | 74   | -0.01 | -0.39 | 6.84  | Neonatal, Antenatal                     |
| RN0930 | 392    | Holt-Oram syndrome                 | 23   | -0.01 | -0.31 | 36.99 | Neonatal                                |
| RDG020 | 98878  | Hemophilia A                       | 1209 | -0.01 | -0.49 | 83.63 | Infancy, Neonatal                       |
| RDG020 | 98879  | Hemophilia B                       | 202  | 0.00  | -0.23 | 57.46 | Infancy, Neonatal                       |
| RN1740 | 899    | Walker-Warburg syndrome            | 6    | 0.00  | -0.02 | 0.19  | Infancy, Neonatal                       |
| RN0260 | 294975 | Phocomelia                         | 43   | 0.00  | -0.30 | 48.78 |                                         |
| RN1010 | 648    | Noonan syndrome                    | 459  | 0.00  | -0.48 | 51.32 | Neonatal                                |
| RN0430 | 2911   | Poland syndrome                    | 299  | 0.00  | -0.49 | 61.65 | Infancy, Neonatal                       |

|        |        |                                         |      |      |       |       |                                          |
|--------|--------|-----------------------------------------|------|------|-------|-------|------------------------------------------|
| RDG020 | 745    | Protein C deficiency                    | 233  | 0.00 | -0.08 | 74.99 | Childhood                                |
| RN0200 | 388    | Hirschsprung disease                    | 244  | 0.00 | -0.48 | 27.03 | Infancy, Neonatal                        |
| RN0060 | 2162   | Holoprosencephaly                       | 46   | 0.00 | -0.45 | 31.20 | Neonatal, Antenatal                      |
| RN1240 | 857    | Townes-Brocks syndrome                  | 8    | 0.00 | -0.02 | 0.33  | All ages                                 |
| RN0210 |        | Biliary atresia                         | 259  | 0.00 | -0.49 | 1.00  |                                          |
| RN1130 | 1297   | Branchio-oculo-facial syndrome          | 7    | 0.00 | -0.07 | 1.10  | Neonatal                                 |
| RNG060 | 1522   | Cranio-metaphyseal dysplasia            | 11   | 0.00 | -0.18 | 2.83  | Childhood                                |
| RN1210 | 819    | Smith-Magenis syndrome                  | 45   | 0.00 | -0.35 | 5.26  | Infancy, Neonatal                        |
| RN0890 | 2053   | Freeman-Sheldon syndrome                | 9    | 0.00 | -0.28 | 9.90  | Neonatal                                 |
| RNG050 | 15?    | Achondroplasia                          | 99   | 0.00 | -0.47 | 10.69 |                                          |
| RCG050 | 187    | Citrullinemia                           | 10   | 0.00 | -0.46 | 11.06 | Neonatal, Adult                          |
| RN0360 | 1465   | Coffin-Siris syndrome                   | 13   | 0.00 | -0.31 | 11.17 | Neonatal                                 |
| RN0410 | 2311   | Jarcho-Levin syndrome                   | 11   | 0.00 | -0.44 | 11.68 | Neonatal, Antenatal                      |
| RN0280 | 950    | Acrodysostosis                          | 12   | 0.00 | -0.48 | 13.03 | Neonatal, Antenatal                      |
| RN1660 | 35125  | Epidermal nevus syndrome                | 15   | 0.00 | -0.07 | 13.54 | Childhood, Adolescent, Adult             |
| RFG070 |        | Nemaline myopathy                       | 9    | 0.00 | -0.37 | 16.12 |                                          |
| RNG040 | 861    | Treacher-Collins syndrome               | 16   | 0.00 | -0.46 | 0.06  | Neonatal                                 |
| RN1450 | 94068  | Congenital spondyloepiphyseal dysplasia | 14   | 0.00 | -0.47 | 0.98  | Neonatal                                 |
| RNG060 | 289    | Ellis-Van Creveld syndrome              | 8    | 0.00 | -0.26 | 1.96  | Neonatal, Antenatal                      |
| RN1590 | 884    | Pallister-Killian syndrome              | 16   | 0.00 | -0.06 | 2.15  | Neonatal, Antenatal                      |
| RN0670 | 281    | Cri du chat syndrome                    | 46   | 0.00 | -0.48 | 3.93  | Neonatal                                 |
| RN0020 | 199642 | Microcephaly                            | 362  | 0.00 | -0.48 | 19.23 |                                          |
| RN0790 | 915    | Aarskog-Scott syndrome                  | 28   | 0.00 | -0.36 | 6.00  | Childhood                                |
| RN0940 | 2322   | Kabuki make-up syndrome                 | 112  | 0.00 | -0.47 | 21.17 | Infancy, Neonatal                        |
| RN0040 | 475    | Joubert syndrome                        | 96   | 0.00 | -0.49 | 27.25 | Neonatal, Antenatal                      |
| RN1270 | 904    | Williams syndrome                       | 316  | 0.00 | -0.49 | 30.76 | Neonatal, Antenatal                      |
| RCG160 | 567    | Di George syndrome                      | 359  | 0.00 | -0.49 | 31.73 | Neonatal                                 |
| RN1620 | 783    | Rubinstein-Taybi syndrome               | 63   | 0.00 | -0.48 | 38.69 | All ages                                 |
| RN1380 | 110    | Bardet-Biedl syndrome                   | 51   | 0.00 | -0.43 | 39.31 | Infancy, Neonatal, Antenatal             |
| RN0660 | 870    | Down syndrome                           | 2283 | 0.00 | -0.47 | 39.46 | Antenatal, Neonatal                      |
| RN0680 | 881    | Turner syndrome                         | 947  | 0.00 | -0.48 | 41.74 | Infancy, Neonatal, Antenatal, Childhood  |
| RN0880 | 1896   | EEC syndrome                            | 114  | 0.00 | -0.46 | 63.11 |                                          |
| RN0770 | 3205   | Sturge-Weber syndrome                   | 134  | 0.00 | -0.43 | 64.52 | Infancy, Neonatal, Childhood, Adolescent |

|        |        |                                     |     |      |       |       |                                           |
|--------|--------|-------------------------------------|-----|------|-------|-------|-------------------------------------------|
| RN1330 | 908    | Fragile X syndrome                  | 288 | 0.00 | -0.37 | 73.51 | Neonatal, Infancy, Childhood              |
| RN1510 | 90308  | Klippel-Trénaunay syndrome          | 170 | 0.00 | -0.48 | 34.86 | Infancy, Childhood, Adolescent            |
| RN0110 | 77     | Aniridia                            | 69  | 0.00 | -0.48 | 38.58 | Infancy, Neonatal                         |
| RCG070 |        | Disorders of fatty acid oxidation a | 98  | 0.00 | -0.48 | 71.76 |                                           |
| RFG050 | 83330  | Werdnig-Hoffman disease             | 13  | 0.00 | -0.36 | 0.39  | Infancy, Neonatal                         |
| RN0290 |        | Camptodactyly                       | 8   | 0.00 | -0.02 | 8.07  |                                           |
| RCG040 | 26     | Methylmalonic acidemia with hon     | 16  | 0.00 | -0.08 | 26.64 | All ages                                  |
| RN0860 | 3157   | De Morsier syndrome                 | 46  | 0.00 | -0.44 | 15.51 | Infancy, Neonatal                         |
| RN1350 |        | Alagille syndrome                   | 65  | 0.01 | -0.42 | 37.60 |                                           |
| RN1400 | 191    | Cockayne syndrome                   | 6   | 0.01 | -0.02 | 16.85 | All ages                                  |
| RN1430 | 220    | Denys-Drash syndrome                | 5   | 0.02 | -0.05 | 16.33 | Infancy, Neonatal                         |
| RN0240 | 2138   | True hermaphroditism                | 17  | 0.02 | -0.44 | 17.08 | Infancy, Neonatal                         |
| RCG040 |        | Organic acidemias and primary lac   | 141 | 0.02 | -0.46 | 53.34 |                                           |
| RN1190 | 2614   | Nail-patella syndrome               | 33  | 0.02 | -0.07 | 63.78 | Neonatal, Infancy, Childhood              |
| RN0340 | 974    | Adams-Oliver syndrome               | 11  | 0.02 | -0.06 | 10.93 | Neonatal                                  |
| RDG020 | 903    | Von Willebrand disease              | 800 | 0.02 | -0.32 | 80.98 | All ages                                  |
| RC0180 | 205    | Crigler-Najjar syndrome             | 27  | 0.04 | -0.04 | 40.56 | Neonatal                                  |
| RP0050 | 70590  | Infantile apnea                     | 20  | 0.04 | -0.44 | 15.20 |                                           |
| RN1180 | 324764 | Trichorhinophalangeal syndrome      | 25  | 0.05 | -0.16 | 13.51 |                                           |
| RN1730 | 893    | WAGR syndrome                       | 8   | 0.07 | -0.03 | 0.84  | Neonatal                                  |
| RN0050 |        | Lissencephaly                       | 120 | 0.07 | -0.39 | 13.85 |                                           |
| RN0950 | 98861  | Primary ciliary dyskinesia, Kartage | 345 | 0.08 | -0.49 | 60.80 | Neonatal, infancy                         |
| RCG040 | 534    | Lowe syndrome                       | 5   | 0.09 | -0.04 | 5.36  | Neonatal                                  |
| RN0300 | 3027   | Caudal regression sequence          | 25  | 0.09 | -0.48 | 18.17 | Infancy, Neonatal                         |
| RF0010 | 726    | Alpers syndrome                     | 11  | 0.09 | -0.07 | 44.72 | mostly 2-4, but up to 36                  |
| RFG080 | 97242  | Congenital muscular dystrophy       | 14  | 0.09 | -0.08 | 2.84  | Infancy, Neonatal                         |
| RCG060 |        | Congenital disorder of glycosylatic | 6   | 0.10 | -0.07 | 0.43  |                                           |
| RCG040 |        | Glutaric aciduria                   | 4   | 0.10 | -0.08 | 35.41 |                                           |
| RN1480 | 435    | Ito hypomelanosis                   | 40  | 0.14 | -0.41 | 29.44 | Childhood                                 |
|        |        |                                     |     |      |       |       | Infancy, Neonatal, Childhood, Adolescent, |
| RN1370 | 64     | Alström syndrome                    | 6   | 0.15 | -0.07 | 10.63 | Adult                                     |
| RCG050 | 247525 | Argininosuccinate synthase deficie  | 14  | 0.16 | -0.07 | 39.32 | All ages                                  |
| RFG010 | 51     | Aicardi-Goutieres syndrome          | 20  | 0.17 | -0.07 | 1.30  | <1m                                       |

|        |        |                                  |      |      |       |       |                                          |
|--------|--------|----------------------------------|------|------|-------|-------|------------------------------------------|
| RN0350 | 192    | Coffin-Lowry syndrome            | 8    | 0.18 | -0.06 | 37.60 | Neonatal                                 |
| RDG010 |        | Pyruvate kinase deficiency       | 19   | 0.19 | -0.08 | 65.37 |                                          |
| RDG010 | 124    | Blackfan-Diamond anemia          | 51   | 0.20 | -0.43 | 34.65 | Infancy, Neonatal, Childhood             |
| RC0070 | 309845 | Disorder of zinc metabolism      | 5    | 0.22 | 0.08  | 0.79  |                                          |
| RN1300 | 72     | Angelman syndrome                | 201  | 0.26 | -0.49 | 24.40 | Infancy                                  |
| RNG040 | 1308   | C syndrome                       | 6    | 0.27 | -0.02 | 3.52  | Neonatal, Antenatal                      |
| RF0140 | 3451   | West syndrome                    | 506  | 0.31 | -0.49 | 16.90 | 3-7 m                                    |
| RFG010 | 702    | Pelizaeus-Merzbacher disease     | 16   | 0.33 | -0.08 | 35.35 | All ages                                 |
| RN0750 | 805    | Tuberous sclerosis               | 793  | 0.38 | -0.49 | 70.85 | All ages                                 |
| RN0370 | 239    | Dyggve-Melchior-Clausen disease  | 4    | 0.39 | -0.03 | 5.94  | Infancy                                  |
| RCG040 |        | Cystinosis                       | 33   | 0.41 | -0.27 | 25.16 |                                          |
| RN0560 | 1775   | Dyskeratosis congenita           | 12   | 0.43 | -0.02 | 10.80 | All ages, usually during childhood       |
| RJ0010 | 223    | Nephrogenic diabetes insipidus   | 52   | 0.44 | -0.31 | 65.22 | Infancy, Neonatal                        |
| RCG120 | 510    | Lesch-Nyhan disease              | 11   | 0.50 | -0.01 | 2.99  | Infancy                                  |
| RF0040 | 778    | Rett syndrome                    | 518  | 0.52 | -0.49 | 20.00 | Infancy, Neonatal                        |
| RNG060 | 240    | Dyschondrosteosis                | 28   | 0.54 | -0.01 | 36.83 | Neonatal                                 |
| RCG140 | 583    | Mucopolysaccharidosis type 6     | 5    | 0.56 | 0.30  | 0.97  | Childhood                                |
| RN0610 | 2092   | Focal dermal hypoplasia          | 12   | 0.59 | -0.45 | 41.09 | Neonatal                                 |
| RCG140 | 579    | Mucopolysaccharidosis type 1     | 18   | 0.60 | -0.04 | 7.00  | All ages                                 |
| RF0030 | 506    | Leigh syndrome                   | 145  | 0.61 | -0.30 | 39.00 | <1                                       |
| RCG060 | 469    | Hereditary fructose intolerance  | 51   | 0.65 | -0.21 | 53.85 | All ages                                 |
| RN1120 |        | Simpson-Golabi-Behmel syndrome   | 6    | 0.65 | -0.07 | 8.44  |                                          |
| RB0020 | 790    | Retinoblastoma                   | 539  | 0.66 | -0.47 | 37.10 | <3                                       |
|        |        |                                  |      |      |       |       | Antenatal, Neonatal, Infancy, Childhood, |
| RCG010 | 112    | Bartter syndrome                 | 60   | 0.68 | -0.36 | 64.31 | Adolescent, Adult                        |
| RFG050 | 83418  | Spinal muscular atrophy type 2   | 13   | 0.71 | -0.03 | 1.49  |                                          |
| RN1600 | 699    | Pearson syndrome                 | 5    | 0.89 | -0.12 | 3.82  | Infancy, Neonatal                        |
| RCG160 | 331223 | Iper-Ige syndrome                | 9    | 0.96 | 0.00  | 17.33 |                                          |
| RN0590 | 317    | Erythrokeratoderma variabilis    | 6    | 1.06 | -0.41 | 47.10 | neonatal, infancy                        |
| RCG160 | 183669 | Agammaglobulinemia               | 88   | 1.09 | -0.36 | 40.55 |                                          |
| RDG010 |        | Thalassemias                     | 1848 | 1.09 | -0.46 | 76.76 |                                          |
| RN0520 | 910    | Xeroderma pigmentosum            | 20   | 1.09 | -0.40 | 53.09 | All ages                                 |
| RC0170 |        | Vitamin D-resistant hypophosphat | 235  | 1.14 | -0.25 | 70.78 |                                          |

|        |        |                                    |     |      |       |       |                                          |
|--------|--------|------------------------------------|-----|------|-------|-------|------------------------------------------|
| RF0130 | 2382   | Lennox-Gastaut syndrome            | 311 | 1.24 | -0.48 | 52.04 | 2-7                                      |
| RN1220 | 828    | Stickler syndrome                  | 56  | 1.33 | -0.29 | 53.74 | Childhood                                |
| RCG070 |        | Carnitine palmitoyltransferase def | 10  | 1.38 | -0.07 | 19.48 |                                          |
| RFG040 | 100    | Ataxia-telangiectasia              | 35  | 1.45 | -0.45 | 39.90 | Infancy, Childhood                       |
| RCG060 |        | Glycogen storage disease           | 303 | 1.46 | -0.35 | 62.07 |                                          |
| RD0050 | 379    | Chronic granulomatous disease      | 63  | 1.51 | -0.42 | 81.84 | Infancy, Childhood, Adolescent, Adult    |
| RCG050 | 90     | Arginase deficiency                | 4   | 1.68 | -0.04 | 9.33  | Infancy, Childhood                       |
| RCG070 | 14     | Abetalipoproteinemia               | 8   | 1.69 | -0.04 | 53.65 | Infancy, Neonatal                        |
| RNG060 | 666    | Osteogenesis imperfecta            | 388 | 1.70 | -0.47 | 65.10 | All ages                                 |
| RCG140 | 581    | Mucopolysaccharidosis type 3       | 12  | 1.74 | -0.08 | 11.45 | Childhood                                |
| RCG140 | 582    | Mucopolysaccharidosis type 4       | 25  | 1.80 | -0.07 | 9.89  | Childhood                                |
| RFG040 |        | Congenital ataxia                  | 4   | 1.89 | 0.93  | 18.75 |                                          |
| RG0040 | 2331   | Kawasaki disease                   | 767 | 1.93 | -0.19 | 51.02 | median: 2                                |
| RCG070 |        | Beta-oxydation deficiency          | 19  | 1.94 | -0.07 | 29.48 |                                          |
| RCG140 | 580    | Mucopolysaccharidosis type 2       | 23  | 1.98 | -0.06 | 6.26  | Childhood                                |
| RFG080 | 98896  | Duchenne muscular dystrophy        | 215 | 2.19 | -0.30 | 45.50 | Childhood                                |
| RDG010 | 232    | Sickle cell anemia                 | 490 | 2.30 | -0.39 | 60.43 | All ages                                 |
| RDG030 | 849    | Glanzmann thrombasthenia           | 12  | 2.33 | -0.45 | 43.26 | Infancy, Neonatal                        |
| RCG110 |        | Erythropoietic protoporphyria      | 30  | 2.45 | 0.00  | 37.08 |                                          |
| RFG010 | 512    | Metachromatic leukodystrophy       | 19  | 2.56 | -0.34 | 52.75 | Childhood, Adolescent, Adult, Infancy    |
| RN0960 | 163634 | Maffucci syndrome                  | 11  | 2.58 | -0.07 | 51.27 | 0-5                                      |
| RFG050 | 83419  | Kugelberg-Welander disease         | 28  | 2.67 | -0.07 | 54.72 | Childhood, adolescence                   |
| RCG060 | 61     | Mannosidosis                       | 7   | 2.92 | -0.06 | 8.34  | Infancy, Neonatal, Childhood             |
| RFG070 |        | Congenital myopathy with fiber ty  | 7   | 2.95 | -0.03 | 10.01 |                                          |
| RNG060 | 562    | McCune-Albright syndrome           | 23  | 2.96 | -0.43 | 57.33 | Childhood                                |
| RB0010 | 654    | Wilms tumor                        | 349 | 2.97 | -0.39 | 18.08 | 1-5                                      |
| RP0070 |        | Congenital hepatic fibrosis        | 36  | 2.99 | -0.08 | 59.50 |                                          |
| RDG020 | 98880  | Afibrinogenemia                    | 7   | 3.33 | -0.08 | 61.08 | Infancy, Neonatal                        |
| RF0060 | 98261  | Progressive myoclonic epilepsy     | 148 | 3.39 | -0.08 | 62.70 | Neonatal, Infancy, Childhood, Adolescent |
| RD0040 | 2686   | Cyclic neutropenia                 | 57  | 3.46 | -0.08 | 56.73 | All ages                                 |
| RN1520 | 98818  | Landau-Kleffner syndrome           | 17  | 3.62 | 0.00  | 6.65  | Childhood                                |
| RD0010 |        | Hemolytic-uremic syndrome          | 338 | 3.71 | 0.01  | 78.26 |                                          |
| RDG020 |        | Dysfibrinogenemia                  | 27  | 3.82 | -0.08 | 76.65 |                                          |

|        |        |                                      |      |      |       |       |                                           |
|--------|--------|--------------------------------------|------|------|-------|-------|-------------------------------------------|
| RFG040 | 98     | Spastic ataxia of Charlevoix-Sague   | 14   | 3.90 | 1.10  | 33.63 | Infancy, Childhood, Adolescent, Adult     |
| RNG050 | 321    | Multiple osteochondromas             | 65   | 4.07 | -0.10 | 67.64 | Childhood                                 |
| RCG080 |        | Niemann-Pick disease                 | 34   | 4.11 | -0.26 | 62.56 |                                           |
| RFG080 | 98895  | Becker muscular dystrophy            | 186  | 4.17 | -0.25 | 69.32 | Childhood                                 |
| RI0080 | 36204  | Intestinal lymphangiectasia          | 35   | 4.37 | -0.07 | 83.63 | All ages                                  |
| RDG010 | 85     | Congenital dyserythropoietic ane     | 36   | 4.40 | -0.06 | 40.79 | Childhood                                 |
| RNG060 |        | Osteopetrosis                        | 23   | 4.44 | -0.34 | 49.20 |                                           |
| RN0650 | 1214   | Parry-Romberg syndrome               | 30   | 4.44 | -0.37 | 50.63 | 2-20                                      |
| RCG070 | 309015 | Familial lipoprotein lipase deficien | 12   | 4.60 | -0.17 | 47.50 | Childhood                                 |
| RF0250 | 215    | Congenital stationary night blindn   | 10   | 4.90 | 0.33  | 53.24 |                                           |
| RN1360 | 63     | Alport syndrome                      | 479  | 5.03 | -0.31 | 65.58 | Childhood                                 |
| RFG090 |        | Becker Disease                       | 10   | 5.05 | 0.93  | 39.68 |                                           |
| RDG010 | 822    | Hereditary spherocytosis             | 653  | 5.07 | -0.48 | 72.90 | All ages                                  |
| RN0150 | 1059   | Blue rubber bleb nevus               | 5    | 5.30 | -0.06 | 76.09 | Childhood                                 |
| RCG050 | 664    | Ornithine transcarbamylase defici    | 28   | 5.32 | -0.08 | 82.27 | Neonatal, All ages                        |
| RNG060 |        | Fairbank disease                     | 5    | 5.36 | -0.01 | 18.28 |                                           |
| RF0200 | 891    | Familial exudative vitreoretinopat   | 82   | 5.51 | -0.25 | 58.33 | Infancy, Neonatal                         |
| RN0330 | 98249  | Ehlers-Danlos syndrome               | 766  | 5.57 | -0.48 | 67.29 | Infancy, Neonatal                         |
|        |        |                                      |      |      |       |       | Neonatal, Infancy, Childhood, Adolescent, |
| RFG010 | 487    | Krabbe disease                       | 23   | 5.79 | 0.00  | 50.78 | Adult                                     |
| RFG110 |        | Vitreoretinal degeneration           | 21   | 5.81 | -0.07 | 53.84 |                                           |
| RDG010 | 84     | Fanconi anemia                       | 38   | 5.90 | -0.05 | 22.20 | Childhood                                 |
| RF0070 | 36899  | Myoclonus-dystonia syndrome          | 16   | 5.91 | -0.44 | 53.21 | <20                                       |
| RDG020 | 330    | Factor XII deficiency                | 4    | 5.97 | -0.04 | 39.54 | All ages                                  |
| RDG020 |        | Congenital coagulation factors def   | 864  | 6.02 | -0.41 | 78.08 |                                           |
| RN0690 |        | Klinefelter syndrome                 | 1445 | 6.10 | -0.48 | 70.43 |                                           |
| RCG020 | 418    | Congenital adrenal hyperplasia       | 233  | 6.49 | -0.49 | 57.14 | All ages                                  |
| RFG070 |        | Centronuclear myopathy               | 20   | 6.71 | -0.38 | 46.83 |                                           |
| RFG110 | 65     | Leber congenital amaurosis           | 70   | 6.73 | -0.08 | 60.25 | Infancy, Neonatal                         |
| RFG140 |        | Lattice corneal dystrophy            | 5    | 6.85 | 0.16  | 42.50 |                                           |
| RD0030 | 761    | Henoch-Schönlein purpura             | 569  | 7.23 | -0.41 | 78.99 | Childhood                                 |
| RC0040 | 169615 | Idiopathic central precocious pube   | 2606 | 7.37 | -0.37 | 53.78 | <8-9                                      |
| RG0010 |        | Rheumatic endocarditis               | 560  | 8.26 | -0.17 | 57.86 |                                           |



|        |        |                                                      |      |       |       |       |                              |
|--------|--------|------------------------------------------------------|------|-------|-------|-------|------------------------------|
| RFG010 |        | Hypomyelinating leukodystrophy 1                     | 6    | 8.53  | 0.04  | 31.77 |                              |
| RN0310 | 2345   | Isolated Klippel-Feil syndrome                       | 39   | 9.00  | -0.37 | 63.67 | Infancy, Neonatal            |
| RCG160 | 183660 | Severe combined immunodeficiency                     | 7    | 9.88  | 0.17  | 68.82 | Infancy, Neonatal            |
| RFG010 | 135    | CACH (childhood ataxia with central hypomyelination) | 12   | 10.21 | -0.07 | 52.85 | Childhood                    |
| RCG100 | 163    | Hereditary hyperferritinemia-cataferritinosis        | 33   | 10.36 | -0.37 | 62.70 | All ages                     |
| RFG090 |        | Thomsen disease                                      | 25   | 10.93 | -0.24 | 51.52 |                              |
| RCG080 | 75234  | Cholesterol ester storage disease                    | 5    | 10.98 | 8.45  | 27.59 | Childhood                    |
| RC0080 |        | Total lipodystrophy                                  | 23   | 10.98 | 0.00  | 62.33 |                              |
| RDG010 |        | Favism                                               | 578  | 11.00 | -0.39 | 84.86 |                              |
| RF0050 | 101    | Dentatorubral pallidoluysian atrophy                 | 5    | 11.44 | 3.45  | 67.36 | 1-60 (average 29)            |
| RC0010 | 199296 | Congenital isolated ACTH deficiency                  | 94   | 11.87 | -0.08 | 73.42 | neonatal                     |
| RN1290 | 3463   | Wolfram syndrome                                     | 22   | 11.89 | -0.08 | 18.54 | <10                          |
| RC0150 | 905    | Wilson disease                                       | 427  | 12.42 | -0.41 | 71.77 | Childhood                    |
| RFG040 | 95     | Friedreich ataxia                                    | 267  | 12.43 | -0.23 | 74.88 | Childhood, Adolescent        |
| RF0290 | 97231  | Ligneous conjunctivitis                              | 4    | 12.44 | 0.04  | 63.75 | Childhood                    |
| RFG090 | 684    | Von Eulenburg disease                                | 10   | 12.67 | 1.07  | 58.00 | Adolescent, Adult, Childhood |
| RCG150 |        | Histiocytosis X                                      | 268  | 13.29 | -0.44 | 71.11 |                              |
| RN1320 | 558    | Marfan syndrome                                      | 838  | 13.34 | -0.46 | 76.83 | All ages                     |
| RCG040 | 470    | Lysinuric protein intolerance                        | 4    | 13.46 | 1.48  | 40.57 | Infancy, Neonatal            |
| RC0190 | 91378  | Hereditary angioedema                                | 344  | 13.82 | -0.22 | 86.40 | All ages                     |
| RN0760 | 2869   | Peutz-Jeghers syndrome                               | 52   | 14.40 | -0.08 | 72.02 | Adolescent, Adult, Childhood |
| RC0020 | 478    | Kallmann syndrome                                    | 356  | 14.60 | -0.42 | 59.40 | Childhood                    |
| RFG110 | 52427  | Retinitis punctata albescens                         | 7    | 14.67 | 4.00  | 53.22 | Childhood                    |
| RFG040 | 1168   | Ataxia with oculomotor apraxia                       | 9    | 14.96 | 4.42  | 18.05 | Childhood                    |
| RFG060 |        | Hereditary sensory neuropathy                        | 11   | 15.16 | -0.20 | 54.73 |                              |
| RCG080 | 355    | Gaucher disease                                      | 140  | 15.39 | -0.32 | 87.22 | All ages                     |
| RN0620 | 2796   | Pachydermoperiostosis                                | 12   | 15.79 | -0.05 | 38.54 | childhood, adolescence       |
| RG0100 | 774    | Hereditary hemorrhagic telangiectasia                | 1102 | 15.79 | -0.42 | 86.16 | Childhood                    |
| RDG030 |        | Storage pool deficiency                              | 9    | 15.89 | 6.51  | 54.23 |                              |
| RFG050 | 65684  | Hirayama disease                                     | 5    | 16.18 | 15.67 | 18.67 | 10-30                        |
| RCG070 |        | Homozygous familial hypercholesterolemia             | 27   | 16.45 | 0.00  | 52.13 |                              |
| RFG080 |        | Limb-girdle muscular dystrophy                       | 33   | 16.49 | 0.09  | 49.18 |                              |
| RDG030 |        | Secretion deficiency thrombocytopenia                | 11   | 16.62 | -0.08 | 59.75 |                              |

|        |        |                                      |      |       |       |       |                                  |
|--------|--------|--------------------------------------|------|-------|-------|-------|----------------------------------|
| RFG110 |        | Usher Syndrome                       | 40   | 16.96 | -0.07 | 45.98 |                                  |
| RFG110 |        | Retinal hyaline dystrophy            | 5    | 17.15 | -0.25 | 46.23 |                                  |
| RN0010 |        | Arnold-Chiari malformation           | 1483 | 17.38 | -0.48 | 79.54 |                                  |
| RCG040 | 214    | Cystinuria                           | 77   | 17.69 | -0.07 | 56.33 | All ages; median 15y             |
| RCG070 | 909    | Cerebrotendinous xanthomatosis       | 64   | 17.98 | 0.01  | 64.00 | Infancy, Neonatal                |
| RFG080 |        | Erb dystrophy                        | 29   | 18.02 | -0.30 | 63.75 |                                  |
| RN0580 | 316    | Progressive symmetric erythroker     | 4    | 18.53 | 0.01  | 48.84 | infancy                          |
| RCG040 |        | Classic homocystinuria               | 79   | 18.66 | -0.22 | 59.60 |                                  |
| RFG070 | 597    | Central core disease                 | 47   | 19.03 | -0.33 | 63.46 | Childhood                        |
| RN0630 | 758    | Pseudoxanthoma elasticum             | 136  | 19.28 | -0.47 | 75.50 | All ages (mostly 10-20)          |
| RCG160 | 1572   | Common variable immunodefici         | 155  | 19.30 | -0.07 | 75.15 | All ages                         |
| RFG060 | 166    | Charcot-Marie-Tooth disease          | 559  | 19.47 | -0.05 | 85.11 |                                  |
| RCG070 |        | Familial hypertriglyceridemia        | 32   | 19.63 | 0.03  | 52.17 |                                  |
| RC0160 | 436    | Hypophosphatasia                     | 6    | 19.78 | 0.96  | 30.63 | All ages                         |
| RF0150 | 2073   | Narcolepsy                           | 540  | 19.79 | 0.39  | 81.91 | 10-30                            |
| RN0550 | 218    | Darier disease                       | 294  | 20.08 | -0.47 | 82.78 | All ages, usually around puberty |
| RFG040 | 96     | Friedreich-like ataxia               | 43   | 20.29 | -0.43 | 61.54 | 5-20                             |
| RI0030 | 2070   | Eosinophilic gastroenteritis         | 149  | 20.36 | -0.10 | 75.68 | 30-50                            |
| RF0120 |        | Adrenoleukodystrophy                 | 131  | 20.64 | -0.47 | 77.60 |                                  |
| RN1650 | 404560 | Familial dysplastic nevus syndrom    | 101  | 20.74 | -0.42 | 72.86 | Childhood, Adolescent, Adult     |
| RCG070 | 650    | Lecithin-cholesterol acyltransferase | 5    | 21.68 | 9.83  | 29.97 | All ages                         |
| RC0060 | 902    | Werner syndrome                      | 14   | 22.05 | 0.00  | 39.52 | 20-30                            |
| RDG020 |        | Antithrombin deficiency              | 67   | 22.18 | -0.08 | 77.95 |                                  |
| RF0300 | 104    | Leber hereditary optic neuropathy    | 212  | 23.35 | -0.04 | 78.08 | 18-30                            |
| RFG010 | 58     | Alexander disease                    | 8    | 23.69 | -0.03 | 65.62 | All ages                         |
| RFG080 | 269    | Landouzy-Dejerine dystrophy          | 183  | 25.15 | 0.00  | 75.95 | 3-60                             |
| RDG020 |        | Homozygous Factor V Leiden           | 40   | 25.27 | -0.08 | 78.86 |                                  |
| RCG040 | 56     | Alkaptonuria                         | 35   | 25.43 | -0.16 | 74.65 | Adult, Infancy                   |
| RF0280 | 156071 | Keratoconus                          | 3971 | 25.69 | -0.02 | 84.46 |                                  |
| RFG090 | 273    | Steinert myotonic dystrophy          | 354  | 25.87 | -0.45 | 75.00 | Neonatal, Adult                  |
| RN0780 | 892    | Von Hippel-Lindau disease            | 89   | 26.00 | -0.02 | 73.54 | All ages (average 26)            |
| RFG070 | 98909  | Desmin-related myofibrillar myop     | 11   | 26.00 | 9.93  | 53.39 |                                  |
| RNG060 |        | Fibrous dysplasia                    | 35   | 26.22 | -0.49 | 62.02 |                                  |

|        |        |                                      |      |       |       |       |                              |
|--------|--------|--------------------------------------|------|-------|-------|-------|------------------------------|
| RN0710 | 550    | MELAS                                | 466  | 26.27 | -0.47 | 80.44 | Adolescent, Adult, Childhood |
| RFG060 | 640    | Tomaculous neuropathy                | 121  | 26.48 | -0.03 | 78.20 | 10-30                        |
| RCG080 | 324    | Fabry disease                        | 270  | 26.51 | -0.22 | 82.41 | Childhood                    |
| RF0210 | 40923  | Eales disease                        | 13   | 26.69 | 15.25 | 56.35 | 20-30                        |
| RDG020 |        | Hereditary thrombophilic disorder    | 1496 | 26.88 | -0.49 | 85.50 |                              |
| RI0040 |        | Chronic intestinal pseudoobstruction | 138  | 27.27 | -0.31 | 80.02 |                              |
| RCG110 | 79273  | Hereditary coproporphyria            | 5    | 27.48 | 17.54 | 54.58 | Adolescent, Adult            |
| RCG070 | 31150  | Tangier disease                      | 7    | 27.63 | 0.00  | 39.65 | Neonatal, Infancy, Childhood |
| RB0050 | 733    | Familial adenomatous polyposis       | 577  | 27.63 | -0.21 | 76.92 | >10                          |
| RFG140 |        | Granular corneal dystrophy           | 8    | 27.72 | 0.00  | 69.94 |                              |
| RF0020 | 480    | Kearns-Sayre syndrome                | 125  | 27.84 | -0.05 | 80.28 | Childhood, Adolescent, Adult |
| RFG110 | 1871   | Progressive cone dystrophy           | 76   | 28.51 | -0.05 | 74.24 |                              |
| RCG070 | 31154  | Familial hypobetalipoproteinemia     | 30   | 29.00 | -0.36 | 69.32 |                              |
| RB0040 | 79665  | Gardner syndrome                     | 5    | 29.95 | 12.95 | 41.78 |                              |
| RFG110 |        | Retinitis pigmentosa                 | 1053 | 29.96 | -0.07 | 85.94 |                              |
| RFG050 | 83420  | Spinal muscular atrophy type 4       | 4    | 30.55 | 4.25  | 46.48 | 10-30                        |
| RN0250 | 1309   | Medullary sponge kidney              | 174  | 30.84 | -0.32 | 64.57 |                              |
| RFG110 | 827    | Stargardt disease                    | 270  | 30.96 | -0.06 | 77.49 | 3-20                         |
| RC0210 | 117    | Behçet disease                       | 1663 | 31.11 | -0.48 | 77.13 | Adult, Adolescent, Childhood |
| RF0160 | 2483   | Melkersson-Rosenthal syndrome        | 20   | 31.30 | 6.00  | 70.31 | Childhood                    |
| RG0110 | 131    | Budd-Chiari syndrome                 | 43   | 31.65 | 3.65  | 60.59 | All ages                     |
| RFG040 |        | Hereditary spastic paraplegia        | 424  | 32.28 | -0.37 | 83.21 |                              |
| RF0230 | 263479 | Fuchs heterochromic iridocyclitis    | 174  | 33.11 | 7.87  | 67.16 |                              |
| RN1570 | 263440 | Neuroacanthocytosis                  | 16   | 33.52 | 17.59 | 51.44 |                              |
| RDG020 |        | Homozygous G20210A prothrombin       | 14   | 33.72 | -0.07 | 79.28 |                              |
| RI0050 | 171    | Primary sclerosing cholangitis       | 398  | 33.75 | -0.19 | 84.53 | All ages (average 40)        |
| RFG040 |        | Autosomal dominant cerebellar ataxia | 27   | 33.81 | -0.39 | 62.29 |                              |
| RFG110 | 1243   | Best vitelliform macular dystrophy   | 101  | 34.50 | 0.00  | 81.77 | Childhood, Adolescent        |
| RD0020 | 447    | Paroxysmal nocturnal hemoglobinuria  | 116  | 34.66 | 11.12 | 78.68 | All ages, pref. adults       |
| RN0720 | 551    | MERRF                                | 76   | 34.74 | 0.02  | 73.60 | Childhood, Adult             |
| RF0270 | 1467   | Cogan syndrome                       | 58   | 34.78 | 9.29  | 71.60 | <30                          |
| RCG030 | 3143   | Schmidt syndrome                     | 56   | 35.55 | 0.52  | 74.93 | adult                        |
| RN0230 | 2924   | Polycystic liver disease             | 144  | 35.77 | -0.08 | 82.40 | >40                          |

|        |        |                                     |     |       |       |       |                              |
|--------|--------|-------------------------------------|-----|-------|-------|-------|------------------------------|
| RC0120 | 48818  | Aceruloplasminemia                  | 7   | 35.92 | 3.92  | 53.07 | adults                       |
| RFG040 |        | Autosomal dominant spinocerebe      | 209 | 36.12 | 0.56  | 69.56 |                              |
| RDG020 |        | Combined Factor V Leiden and he     | 75  | 36.19 | -0.07 | 77.40 |                              |
| RGG010 |        | Thrombocytopenic thrombotic pu      | 8   | 36.88 | 21.12 | 62.03 |                              |
| RN1720 | 3437   | Vogt-Koyanagi-Harada disease        | 78  | 37.18 | 9.49  | 61.71 | 10-52 (average 30)           |
| RCG110 | 79276  | Acute intermittent porphyria        | 19  | 37.77 | 2.97  | 57.57 | Adolescent, Adult            |
| RC0200 | 60     | Congenital alpha-1-antitrypsin def  | 350 | 37.96 | -0.08 | 75.39 | All ages                     |
| RL0020 | 1656   | Dermatitis herpetiformis            | 302 | 38.07 | 0.42  | 84.95 | All ages                     |
| RCG150 |        | Non-Langerhans cell histiocytosis   | 10  | 38.24 | -0.07 | 69.42 |                              |
| RA0010 | 548    | Hansen disease (Leprosy)            | 13  | 38.27 | 18.05 | 55.79 | All ages                     |
| RB0060 | 538    | Lymphangioma myomatosis             | 160 | 38.42 | 0.02  | 72.02 | Adults                       |
| RFG040 |        | Periodic ataxia                     | 12  | 38.89 | 0.00  | 78.74 |                              |
| RGG010 | 54057  | Thrombotic thrombocytopenic pu      | 207 | 38.93 | 9.35  | 77.18 | All ages                     |
| RFG010 | 2478   | Megalencephalic leukoencephalo      | 8   | 39.10 | 0.33  | 55.64 | Infancy, Neonatal            |
| RA0030 | 91546  | Lyme disease                        | 106 | 39.52 | 0.66  | 79.26 | All ages                     |
| RC0090 | 36397  | Dercum disease                      | 25  | 39.79 | 0.02  | 66.10 | 45-60                        |
| RN1490 |        | Isaacs syndrome                     | 23  | 40.65 | 17.09 | 74.91 |                              |
| RN0220 | 53035  | Caroli disease                      | 52  | 40.70 | -0.26 | 72.79 | All ages                     |
| RCG110 | 79473  | Porphyria variegata                 | 8   | 40.89 | 21.83 | 47.45 | Adolescent, Adult            |
| RCG070 | 425    | Familial hypocalcaemic proteinemia  | 4   | 41.05 | 35.42 | 51.67 | All ages                     |
| RG0090 | 3287   | Takayasu arteritis                  | 284 | 41.17 | 9.38  | 74.03 | 10-30                        |
| RM0030 | 809    | Mixed connective tissue disease     | 774 | 41.67 | -0.29 | 87.90 | 15-35                        |
| RCG100 | 209981 | Iron refractory iron deficiency ane | 4   | 41.74 | 30.83 | 51.28 | Infancy, Neonatal            |
| RFG140 | 98625  | Superficial corneal dystrophy       | 7   | 42.63 | 32.95 | 72.26 | 3-20                         |
| RFG140 | 98973  | Posterior polymorphous corneal d    | 4   | 43.64 | 25.03 | 65.17 | Childhood                    |
| RJ0030 | 37202  | Interstitial cystitis               | 930 | 43.97 | 0.01  | 84.01 | All ages                     |
| RFG090 | 606    | Proximal myotonic myopathy          | 26  | 44.76 | 0.52  | 65.36 | Adult                        |
| RFG040 | 1173   | Cerebellar ataxia-hypogonadism      | 14  | 44.82 | 0.00  | 75.09 | Adolescent, Adult, Childhood |
| RCG100 |        | Hereditary hemochromatosis          | 992 | 44.93 | -0.45 | 87.72 |                              |
| RG0030 | 767    | Polyarteritis nodosa                | 161 | 45.36 | 0.50  | 80.51 | 40-60                        |
| RFG080 | 1876   | Oculogastrointestinal muscular dy   | 13  | 45.52 | -0.38 | 66.55 | Childhood                    |
| RFG140 | 98627  | Posterior corneal dystrophy         | 15  | 46.08 | -0.01 | 60.37 | All ages                     |
| RF0090 |        | Idiopathic torsion dystonia         | 555 | 46.42 | 0.00  | 80.05 |                              |

|        |        |                                   |      |       |       |       |                             |
|--------|--------|-----------------------------------|------|-------|-------|-------|-----------------------------|
| RFG050 | 481    | Kennedy disease                   | 31   | 47.16 | 19.45 | 77.30 | 30-60                       |
| RI0010 | 930    | Idiopathic achalasia              | 1060 | 47.17 | -0.08 | 89.49 | 30-60                       |
| RF0080 | 399    | Huntington disease                | 1188 | 47.70 | -0.07 | 84.91 | All ages (average 30-50)    |
| RFG040 |        | Idiopathic spinocerebellar ataxia | 44   | 48.83 | 5.14  | 72.55 |                             |
| RG0060 | 375    | Goodpasture syndrome              | 24   | 48.92 | 17.19 | 76.07 | Adolescent, Adult           |
| RM0040 | 3165   | Eosinophilic fasciitis            | 73   | 49.24 | 3.49  | 79.21 | Adult                       |
| RM0010 | 221    | Dermatomyositis                   | 825  | 49.57 | -0.09 | 85.79 | All ages                    |
| RM0060 | 728    | Relapsing polychondritis          | 83   | 50.66 | 5.61  | 80.06 | 40-55                       |
| RG0050 | 183    | Churg-Strauss syndrome            | 748  | 50.77 | 0.00  | 85.26 | 15-70                       |
| RCG010 |        | Conn syndrome                     | 18   | 51.14 | 25.91 | 72.35 |                             |
| RCG110 | 101330 | Porphyria cutanea tarda           | 53   | 51.47 | 22.11 | 71.52 | Adult                       |
| RA0020 | 3452   | Whipple disease                   | 54   | 51.87 | 7.50  | 80.11 | 51 (Mean); range: 4-77 [26] |
| RL0060 |        | Lichen sclerosus                  | 1534 | 52.25 | 0.00  | 89.10 |                             |
| RN1610 | 2905   | POEMS syndrome                    | 31   | 52.27 | 34.02 | 77.80 | Adult, Elderly              |
| RNG060 |        | Congenital osteodystrophy         | 45   | 52.48 | -0.04 | 76.79 |                             |
| RFG140 | 98974  | Fuchs endothelial dystrophy       | 13   | 52.57 | 43.03 | 70.00 | 40-60                       |
| RG0070 | 900    | Wegener granulomatosis            | 712  | 53.07 | 0.00  | 88.37 | All ages (average 45)       |
| RL0030 |        | Pemphigus vulgaris                | 1736 | 53.20 | 4.51  | 89.94 |                             |
| RM0050 |        | Diffuse fasciitis                 | 9    | 53.27 | 4.02  | 85.34 |                             |
| RN1700 | 816    | Sjögren-Larsson syndrome          | 53   | 53.37 | -0.04 | 76.83 | Infancy, Neonatal           |
| RF0180 | 2932   | Chronic inflammatory demyelinati  | 1414 | 54.11 | 1.64  | 87.10 | 40-60                       |
| RM0020 | 732    | Polymyositis                      | 708  | 54.75 | -0.43 | 89.00 | 45-60                       |
| RFG140 | 98958  | Droplet cornea                    | 4    | 54.94 | 42.10 | 75.26 |                             |
| RF0190 | 43393  | Lambert-Eaton syndrome            | 50   | 55.31 | -0.03 | 75.57 | >40                         |
| RFG040 | 102    | Multisystem atrophy               | 48   | 55.36 | 39.62 | 71.81 | >30; average 55-60          |
| RFG140 |        | Cogan dystrophy                   | 8    | 55.45 | 0.00  | 83.03 |                             |
| RJ0020 | 49041  | Retroperitoneal fibrosis          | 299  | 57.46 | 5.38  | 85.59 | Adult                       |
| RF0110 | 35689  | Primary lateral sclerosis         | 225  | 57.85 | 0.52  | 82.02 | Elderly, Adult              |
| RFG040 | 559    | Marinesco-Sjögren syndrome        | 27   | 58.17 | 0.33  | 85.13 | Infancy, Childhood          |
| RC0110 |        | Mixed cryoglobulinemia            | 1227 | 58.95 | 0.00  | 88.42 |                             |
| RG0020 | 727    | Microscopic polyangiitis          | 438  | 61.66 | 1.45  | 89.50 | >10; average 50-60          |
| RL0050 | 46486  | Mucous membrane pemphigoid        | 252  | 62.17 | 7.32  | 85.78 | 60-70                       |
| RF0100 | 803    | Amyotrophic lateral sclerosis     | 7047 | 65.12 | -0.16 | 89.31 | about 60                    |

|        |        |                                     |      |       |       |       |       |
|--------|--------|-------------------------------------|------|-------|-------|-------|-------|
| RF0170 | 240071 | Steele-Richardson-Olszewski disease | 306  | 68.24 | 43.49 | 85.80 | 50-70 |
| RG0080 | 397    | Giant cell arteritis                | 1424 | 71.57 | 10.38 | 89.59 | >50   |
| RL0040 |        | Bullous pemphigoid                  | 1816 | 74.80 | -0.36 | 89.92 |       |

---

## References

- [24] ORPHANET. Disease data sheets. Available online: [http://www.orpha.net/consor/cgi-bin/Disease\\_Search\\_Simple.php?lng=EN](http://www.orpha.net/consor/cgi-bin/Disease_Search_Simple.php?lng=EN) (Accessed on 3 April 2017).
- [26] Dutly F., Altwegg M. Whipple's Disease and "Tropheryma whippelii". Clin Microbiol Rev 2001, 14, 561–583.
