# Supplementary material for: The Occurrence of 275 Rare Diseases and 47 Rare Disease Groups in Italy. Results from the National Registry of Rare Diseases
Source: MDPI journal article supplement (doi:10.3390/ijerph15071470), 2018-07-12
Supplement: s1 [file s1]

**Table S6. Sex distribution of the rare diseases reported to RNMR**

**Record source:** Subset 1; **Notifying regions:** all; **Record selection:** records with diagnosis indicating a specific disease (i.e.: excluding disease groups) and at least 4 records per disease; **Total records:**119762.

**Note:** The number of records is indicated with the only aim of allowing a better assessment of the statistical data presented and cannot be used as an indication of the disease or exemption code frequency. Where the percentages in males and females sum to less than 100, the difference represents records with missing sex data.

| RNMR Code | ORPHA Code | Disease                                  | Records (N) | Females (%) | Males (%) | F:M ratio and other literature information reported by ORPHANET data sheets [24] | Comment |
|-----------|------------|------------------------------------------|-------------|-------------|-----------|----------------------------------------------------------------------------------|---------|
| RNG040    | 1791       | Frontofacionasal dysplasia               | 7           | 100         | 0         |                                                                                  |         |
| RCG100    | 209981     | Iron refractory iron deficiency anemia   | 4           | 100         | 0         |                                                                                  |         |
| RN0680    | 881        | Turner syndrome                          | 1754        | 99          | 1         | Almost exclusively in F                                                          |         |
| RF0040    | 778        | Rett syndrome                            | 603         | 97          | 3         | Predominant in F                                                                 |         |
| RB0060    | 538        | Lymphangioma myomatosis                  | 180         | 97          | 3         | Almost exclusively in F                                                          |         |
| RN0510    | 464        | Incontinentia pigmenti                   | 95          | 97          | 3         | 20:1                                                                             |         |
| RJ0030    | 37202      | Interstitial cystitis                    | 1192        | 95          | 5         | 9:1                                                                              |         |
| RDG030    |            | Storage pool deficiency                  | 11          | 91          | 9         |                                                                                  |         |
| RN1700    | 816        | Sjögren-Larsson syndrome                 | 93          | 90          | 9         |                                                                                  |         |
| RGG010    |            | Thrombocytopenic thrombotic purpura      | 10          | 90          | 10        |                                                                                  |         |
| RFG040    | 559        | Marinesco-Sjögren syndrome               | 30          | 90          | 10        |                                                                                  |         |
| RC0040    | 169615     | Idiopathic central precocious puberty    | 3686        | 89          | 11        | 10:1                                                                             |         |
| RFG140    | 98973      | Posterior polymorphous corneal dystrophy | 8           | 88          | 13        |                                                                                  |         |
| RCG110    | 79473      | Porphyria variegata                      | 8           | 88          | 13        | Predominant in F                                                                 |         |
| RN1130    | 1297       | Branchio-oculo-facial syndrome           | 8           | 88          | 13        |                                                                                  |         |
| RCG030    | 3143       | Schmidt syndrome                         | 72          | 86          | 14        |                                                                                  |         |
| RNG040    | 1452       | Cleidocranial dysostosis                 | 7           | 86          | 14        |                                                                                  |         |
| RNG050    | 429        | Hypochondroplasia                        | 7           | 86          | 14        |                                                                                  |         |
| RM0030    | 809        | Mixed connective tissue disease          | 1092        | 86          | 14        | 10:1                                                                             |         |
| RG0090    | 3287       | Takayasu arteritis                       | 346         | 85          | 14        | Predominant in F                                                                 |         |
| RF0160    | 2483       | Melkersson-Rosenthal syndrome            | 25          | 84          | 16        |                                                                                  |         |
| RN0590    | 317        | Erythrokeratoderma variabilis            | 6           | 83          | 17        |                                                                                  |         |
| RFG140    | 98958      | Droplet cornea                           | 17          | 82          | 18        |                                                                                  |         |
| RC0160    | 436        | Hypophosphatasia                         | 11          | 82          | 18        |                                                                                  |         |
| RDG030    |            | Secretion deficiency thrombocytopathy    | 11          | 82          | 18        |                                                                                  |         |
| RN0830    | 125        | Bloom syndrome                           | 5           | 80          | 20        |                                                                                  |         |
| RCG110    | 79273      | Hereditary coproporphyria                | 5           | 80          | 20        | Predominant in F                                                                 |         |
| RFG140    | 98974      | Fuchs endothelial dystrophy              | 30          | 80          | 20        | 3-4:1                                                                            |         |
| RCG140    | 581        | Mucopolysaccharidosis type 3             | 5           | 80          | 20        |                                                                                  |         |
| RN0900    | 2059       | Fryns syndrome                           | 5           | 80          | 20        |                                                                                  |         |
| RFG040    |            | Sub-acute cerebellar degeneration        | 14          | 79          | 21        |                                                                                  |         |
| RC0080    |            | Total lipodystrophy                      | 35          | 77          | 23        |                                                                                  |         |
| RGG010    | 54057      | Thrombotic thrombocytopenic purpura      | 223         | 76          | 24        |                                                                                  |         |
| RN0610    | 2092       | Focal dermal hypoplasia                  | 21          | 76          | 24        | X-linked dominant                                                                |         |
| RN0230    | 2924       | Polycystic liver disease                 | 171         | 76          | 24        | Predominant in F                                                                 |         |
| RCG070    | 14         | Abetalipoproteinemia                     | 12          | 75          | 25        |                                                                                  |         |
| RF0240    | 98981      | Essential iris atrophy                   | 4           | 75          | 25        |                                                                                  |         |
| RCG060    | 348        | Fructose-1,6-bisphosphatase deficiency   | 4           | 75          | 25        |                                                                                  |         |
| RCG070    |            | Homozygous familial hypercholesterolemia | 8           | 75          | 25        |                                                                                  |         |
| RC0050    | 508        | Leprechaunism                            | 4           | 75          | 25        |                                                                                  |         |
| RCG040    | 35         | Propionic acidemia                       | 4           | 75          | 25        |                                                                                  |         |
| RN0370    | 239        | Dyggve-Melchior-Clausen disease          | 4           | 75          | 25        |                                                                                  |         |
| RN1680    | 3352       | Tricho-dento-osseous syndrome            | 4           | 75          | 25        |                                                                                  |         |
| RN0480    | 3377       | Trismus-pseudocamptodactyly              | 4           | 75          | 25        |                                                                                  |         |
| RN0630    | 758        | Pseudoxanthoma elasticum                 | 197         | 75          | 25        | 2:1                                                                              |         |
| RNG060    | 240        | Dyschondrosteosis                        | 43          | 74          | 26        |                                                                                  |         |
| RCG020    | 418        | Congenital adrenal hyperplasia           | 374         | 74          | 26        |                                                                                  |         |
| RG0080    | 397        | Giant cell arteritis                     | 1733        | 74          | 26        | 2:1                                                                              |         |
| RI0040    |            | Chronic intestinal pseudoobstruction     | 148         | 74          | 26        |                                                                                  |         |
| RN0330    | 98249      | Ehlers-Danlos syndrome                   | 1040        | 73          | 27        |                                                                                  |         |

|        |        |                                          |      |    |    |                                                         |
|--------|--------|------------------------------------------|------|----|----|---------------------------------------------------------|
| RNG060 | 562    | McCune-Albright syndrome                 | 29   | 72 | 28 |                                                         |
| RN1720 | 3437   | Vogt-Koyanagi-Harada disease             | 90   | 72 | 28 | Predominant in F                                        |
| RCG160 | 183660 | Severe combined immunodeficiency         | 7    | 71 | 29 | One form X-linked                                       |
| RCG050 |        | Hereditary hyperammonemia                | 7    | 71 | 29 |                                                         |
| RFG110 | 52427  | Retinitis punctata albescens             | 7    | 71 | 29 |                                                         |
| RN1370 | 64     | Alström syndrome                         | 14   | 71 | 29 |                                                         |
| RN1670 |        | Multiple pterygium syndrome              | 7    | 71 | 29 |                                                         |
| RFG040 |        | Autosomal dominant cerebellar ataxia     | 31   | 71 | 29 |                                                         |
| RC0110 |        | Mixed cryoglobulinemia                   | 1609 | 71 | 29 |                                                         |
| RG0110 | 131    | Budd-Chiari syndrome                     | 64   | 70 | 30 |                                                         |
| RN1290 | 3463   | Wolfram syndrome                         | 33   | 70 | 30 |                                                         |
| RM0020 | 732    | Polymyositis                             | 974  | 69 | 30 | 2:1                                                     |
| RN0340 | 974    | Adams-Oliver syndrome                    | 13   | 69 | 31 |                                                         |
| RC0030 |        | Reifenstein syndrome                     | 45   | 69 | 31 |                                                         |
| RM0010 | 221    | Dermatomyositis                          | 1084 | 69 | 31 | 2:1                                                     |
| RC0090 | 36397  | Dercum disease                           | 31   | 68 | 32 | Predominant in F                                        |
| RDG020 |        | Hereditary thrombophilic disorders       | 3677 | 67 | 33 |                                                         |
| RCG050 | 23     | Argininosuccinatelyase deficiency        | 12   | 67 | 33 |                                                         |
| RN0150 | 1059   | Blue rubber bleb nevus                   | 9    | 67 | 33 |                                                         |
| RF0290 | 97231  | Ligneous conjunctivitis                  | 6    | 67 | 33 |                                                         |
| RN0500 |        | Cutis laxa                               | 12   | 67 | 33 |                                                         |
| RN1440 | 2710   | Oculodentodigital dysplasia              | 6    | 67 | 33 |                                                         |
| RFG140 | 98627  | Posterior corneal dystrophy              | 15   | 67 | 33 |                                                         |
| RFG110 |        | Retinal hyaline dystrophy                | 6    | 67 | 33 |                                                         |
| RCG040 | 407    | Non-ketotic hyperglycinemia              | 6    | 67 | 33 |                                                         |
| RFG010 |        | Hypomyelinating leukodystrophy type 2    | 6    | 67 | 33 |                                                         |
| RFG090 | 684    | Von Eulenburg disease                    | 12   | 67 | 33 |                                                         |
| RCG140 | 579    | Mucopolysaccharidosis type 1             | 18   | 67 | 33 |                                                         |
| RCG140 | 582    | Mucopolysaccharidosis type 4             | 9    | 67 | 33 |                                                         |
| RNG060 |        | Congenital osteodystrophy                | 45   | 67 | 33 |                                                         |
| RN0960 | 163634 | Maffucci syndrome                        | 24   | 67 | 33 |                                                         |
| RL0050 | 46486  | Mucous membrane pemphigoid               | 308  | 66 | 34 | Predominant in F                                        |
| RN0250 | 1309   | Medullary sponge kidney                  | 184  | 66 | 34 |                                                         |
| RF0090 |        | Idiopathic torsion dystonia              | 948  | 65 | 35 |                                                         |
| RDG020 |        | Homozygous Factor V Leiden               | 40   | 65 | 35 |                                                         |
| RNG070 |        | Autosomal recessive congenital ichthyo:  | 17   | 65 | 35 |                                                         |
| RCG100 | 163    | Hereditary hyperferritinemia-cataract sy | 34   | 65 | 35 |                                                         |
| RCG050 | 664    | Ornithine transcarbamylase deficiency    | 28   | 64 | 36 | The severe, neonatal-onset form almost exclusively in M |
| RDG020 |        | Homozygous G20210A prothrombin           | 14   | 64 | 36 |                                                         |
| RDG020 |        | Antithrombin deficiency                  | 67   | 64 | 36 |                                                         |
| RFG070 | 597    | Central core disease                     | 63   | 63 | 37 |                                                         |
| RDG020 |        | Congenital coagulation factors deficienc | 1151 | 63 | 37 |                                                         |
| RCG110 | 79276  | Acute intermittent porphyria             | 19   | 63 | 37 |                                                         |
| RDG020 |        | Dysfibrinogenemia                        | 27   | 63 | 37 |                                                         |
| RN1480 | 435    | Ito hypomelanosis                        | 51   | 63 | 37 |                                                         |
| RM0060 | 728    | Relapsing polychondritis                 | 115  | 63 | 37 |                                                         |
| RN0010 |        | Arnold-Chiari malformation               | 1830 | 63 | 37 |                                                         |
| RC0120 | 48818  | Aceruloplasminemia                       | 8    | 63 | 38 |                                                         |
| RFG070 |        | Nemaline myopathy                        | 16   | 63 | 38 |                                                         |
| RN0300 | 3027   | Caudal regression sequence               | 40   | 63 | 38 |                                                         |
| RN0360 | 1465   | Coffin-Siris syndrome                    | 16   | 63 | 38 |                                                         |
| RFG040 | 96     | Friedreich-like ataxia                   | 45   | 62 | 38 |                                                         |
| RNG040 | 861    | Treacher-Collins syndrome                | 29   | 62 | 38 |                                                         |
| RN1150 | 1340   | Cardiofaciocutaneous syndrome            | 65   | 62 | 38 |                                                         |
| RN0310 | 2345   | Isolated Klippel-Feil syndrome           | 70   | 61 | 39 |                                                         |
| RN0060 | 2162   | Holoprosencephaly                        | 62   | 61 | 39 |                                                         |
| RA0030 | 91546  | Lyme disease                             | 170  | 61 | 38 |                                                         |
| RD0040 | 2686   | Cyclic neutropenia                       | 82   | 61 | 39 |                                                         |
| RNG070 | 313    | Lamellar ichthyosis                      | 64   | 61 | 39 |                                                         |
| RN0650 | 1214   | Parry-Romberg syndrome                   | 64   | 61 | 39 | Slightly predominant in F                               |
| RFG080 |        | Limb-girdle muscular dystrophy           | 33   | 61 | 39 |                                                         |
| RFG040 | 102    | Multisystem atrophy                      | 48   | 60 | 40 |                                                         |
| RN0700 | 280    | Wolf-Hirschhorn syndrome                 | 88   | 60 | 40 | 2:1                                                     |
| RFG140 |        | Lattice corneal dystrophy                | 10   | 60 | 40 |                                                         |

(1)

|        |        |                                         |      |    |    |                             |
|--------|--------|-----------------------------------------|------|----|----|-----------------------------|
| RN0580 | 316    | Progressive symmetric erythrokeratoder  | 5    | 60 | 40 |                             |
| RFG060 | 99951  | Charcot-Marie-Tooth disease type 4E     | 5    | 60 | 40 |                             |
| RN0350 | 192    | Coffin-Lowry syndrome                   | 10   | 60 | 40 | X-linked dominant           |
| RN1600 | 699    | Pearson syndrome                        | 5    | 60 | 40 |                             |
| RDG020 | 903    | Von Willebrand disease                  | 1047 | 60 | 40 |                             |
| RC0170 |        | Vitamin D-resistant hypophosphatemic    | 317  | 60 | 40 |                             |
| RCG060 | 469    | Hereditary fructose intolerance         | 70   | 59 | 41 |                             |
| RNG060 |        | Fibrous dysplasia                       | 68   | 59 | 41 |                             |
| RDG020 |        | Combined Factor V Leiden and heterozy   | 75   | 59 | 41 |                             |
| RNG040 |        | Pierre Robin syndrome                   | 53   | 58 | 42 |                             |
| RN1180 | 324764 | Trichorhinophalangeal syndrome          | 53   | 58 | 42 |                             |
| RN1510 | 90308  | Klippel-Trénaunay syndrome              | 226  | 58 | 42 |                             |
| RN0080 | 1764   | Familial dysautonomia                   | 12   | 58 | 42 |                             |
| RFG140 |        | Granular corneal dystrophy              | 12   | 58 | 42 |                             |
| RCG140 | 581    | Mucopolysaccharidosis type 3            | 12   | 58 | 42 |                             |
| RNG060 |        | Osteopetrosis                           | 36   | 58 | 42 |                             |
| RN0550 | 218    | Darier disease                          | 361  | 58 | 42 |                             |
| RM0040 | 3165   | Eosinophilic fasciitis                  | 98   | 58 | 42 |                             |
| RL0030 |        | Pemphigus vulgaris                      | 2070 | 58 | 42 |                             |
| RN1660 | 35125  | Epidermal nevus syndrome                | 26   | 58 | 42 |                             |
| RN1410 | 199    | Cornelia de Lange syndrome              | 111  | 58 | 42 | One form X-linked recessive |
| RN0130 | 35737  | Morning glory syndrome                  | 14   | 57 | 43 |                             |
| RFG040 | 98     | Spastic ataxia of Charlevoix-Saguenay   | 14   | 57 | 43 |                             |
| RN0240 | 2138   | True hermaphroditism                    | 21   | 57 | 43 |                             |
| RFG070 |        | Congenital myopathy with fiber type dis | 7    | 57 | 43 |                             |
| RN0710 | 550    | MELAS                                   | 618  | 57 | 43 |                             |
| RN1190 | 2614   | Nail-patella syndrome                   | 51   | 57 | 43 |                             |
| RD0010 |        | Hemolytic-uremic syndrome               | 368  | 57 | 43 |                             |
| RF0020 | 480    | Kearns-Sayre syndrome                   | 215  | 57 | 43 |                             |
| RN1620 | 783    | Rubinstein-Taybi syndrome               | 90   | 57 | 43 |                             |
| RDG020 | 745    | Protein C deficiency                    | 233  | 57 | 43 |                             |
| RCG080 | 324    | Fabry disease                           | 410  | 57 | 43 | X-linked recessive          |
| RN0640 | 1114   | Aplasia cutis congenita                 | 16   | 56 | 44 |                             |
| RG0050 | 183    | Churg-Strauss syndrome                  | 936  | 56 | 44 |                             |
| RNG040 |        | Oculomaxillofacial dysostosis           | 68   | 56 | 44 |                             |
| RN0110 | 77     | Aniridia                                | 104  | 56 | 44 |                             |
| RD0020 | 447    | Paroxysmal nocturnal hemoglobinuria     | 155  | 55 | 45 |                             |
| RF0110 | 35689  | Primary lateral sclerosis               | 258  | 55 | 45 |                             |
| RL0060 |        | Lichen sclerosus                        | 1971 | 55 | 45 |                             |
| RN1450 | 94068  | Congenital spondyloepiphyseal dysplasi  | 29   | 55 | 45 |                             |
| RF0060 | 98261  | Progressive myoclonic epilepsy          | 174  | 55 | 45 |                             |
| RDG020 | 327    | Factor VII deficiency                   | 98   | 55 | 45 |                             |
| RN1570 | 263440 | Neuroacanthocytosis                     | 20   | 55 | 45 |                             |
| RB0010 | 654    | Wilms tumor                             | 491  | 55 | 44 |                             |
| RN0020 | 199642 | Microcephaly                            | 421  | 55 | 45 |                             |
| RF0270 | 1467   | Cogan syndrome                          | 73   | 55 | 45 |                             |
| RN0770 | 3205   | Sturge-Weber syndrome                   | 170  | 55 | 45 |                             |
| RN0290 |        | Camptodactyly                           | 11   | 55 | 45 |                             |
| RP0010 | 290    | Congenital rubella syndrome             | 33   | 55 | 45 |                             |
| RI0080 | 36204  | Intestinal lymphangiectasia             | 44   | 55 | 45 |                             |
| RB0040 | 79665  | Gardner syndrome                        | 11   | 55 | 45 |                             |
| RN0740 |        | Ivemark syndrome                        | 11   | 55 | 45 |                             |
| RN1050 |        | Rieger syndrome                         | 11   | 55 | 45 |                             |
| RN0780 | 892    | Von Hippel-Lindau disease               | 191  | 54 | 46 |                             |
| RNG050 | 321    | Multiple osteochondromas                | 96   | 54 | 46 | 1:1.5                       |
| RDG020 | 326    | Factor V deficiency                     | 24   | 54 | 46 |                             |
| RL0040 |        | Bullous pemphigoid                      | 2296 | 54 | 46 |                             |
| RN0750 | 805    | Tuberous sclerosis                      | 1145 | 54 | 46 |                             |
| RDG010 |        | Thalassemias                            | 2534 | 54 | 46 |                             |
| RFG040 | 95     | Friedreich ataxia                       | 284  | 54 | 46 |                             |
| RCG040 | 511    | Maple syrup urine disease               | 26   | 54 | 46 |                             |
| RNG040 | 207    | Crouzon disease                         | 52   | 54 | 46 |                             |
| RC0210 | 117    | Behçet disease                          | 2307 | 53 | 46 |                             |
| RG0100 | 774    | Hereditary hemorrhagic telangiectasia   | 1231 | 53 | 47 |                             |
| RCG080 |        | Niemann-Pick disease                    | 60   | 53 | 47 |                             |

|        |        |                                           |      |    |    |                                                   |
|--------|--------|-------------------------------------------|------|----|----|---------------------------------------------------|
| RC0060 | 902    | Werner syndrome                           | 15   | 53 | 47 |                                                   |
| RNG060 | 666    | Osteogenesis imperfecta                   | 479  | 53 | 47 |                                                   |
| RN1530 | 500    | LEOPARD syndrome                          | 47   | 53 | 47 |                                                   |
| RN0950 | 98861  | Primary ciliary dyskinesia, Kartagener ty | 463  | 53 | 47 |                                                   |
| RN0180 | 1203   | Duodenal atresia                          | 83   | 53 | 47 |                                                   |
| RN0120 |        | Congenital colobomatous optic disc        | 187  | 53 | 47 |                                                   |
| RN1200 |        | Smith-Lemli-Opitz syndrome type 1         | 34   | 53 | 47 |                                                   |
| RN0820 |        | Beckwith-Wiedemann syndrome               | 333  | 53 | 47 |                                                   |
| RDG010 | 85     | Congenital dyserythropoietic anemia       | 36   | 53 | 47 | One form X-linked recessive                       |
| RN0540 | 1556   | Cutis marmorata telangiectatica congen    | 36   | 53 | 47 |                                                   |
| RN0600 | 312    | Epidermolytic ichthyosis                  | 36   | 53 | 47 |                                                   |
| RG0070 | 900    | Wegener granulomatosis                    | 938  | 53 | 47 |                                                   |
| RN0850 | 138    | CHARGE syndrome                           | 165  | 53 | 47 |                                                   |
| RDG010 |        | Pyruvate kinase deficiency                | 19   | 53 | 47 |                                                   |
| RN0050 |        | Lissencephaly                             | 166  | 52 | 48 |                                                   |
| RCG080 | 355    | Gaucher disease                           | 208  | 52 | 48 |                                                   |
| RDG010 | 84     | Fanconi anemia                            | 42   | 52 | 48 | One form X-linked recessive                       |
| RFG010 | 512    | Metachromatic leukodystrophy              | 23   | 52 | 48 |                                                   |
| RN0990 | 570    | Moebius syndrome                          | 73   | 52 | 48 |                                                   |
| RC0190 | 91378  | Hereditary angioedema                     | 515  | 52 | 48 |                                                   |
| RCG040 |        | Classic homocystinuria                    | 106  | 52 | 48 |                                                   |
| RD0030 | 761    | Henoch-Schönlein purpura                  | 644  | 52 | 48 | 1:1.5                                             |
| RCG160 | 1572   | Common variable immunodeficiency          | 155  | 52 | 48 |                                                   |
| RF0080 | 399    | Huntington disease                        | 1553 | 51 | 49 |                                                   |
|        |        |                                           |      |    |    | Severe, quickly progressing form predominant in M |
| RN1360 | 63     | Alport syndrome                           | 525  | 51 | 49 |                                                   |
| RFG040 |        | Autosomal dominant spinocerebellar at:    | 209  | 51 | 49 |                                                   |
| RN0210 |        | Biliary atresia                           | 336  | 51 | 49 |                                                   |
| RG0020 | 727    | Microscopic polyangiitis                  | 495  | 51 | 49 |                                                   |
| RN0720 | 551    | MERRF                                     | 92   | 51 | 49 |                                                   |
| RF0170 | 240071 | Steele-Richardson-Olszewski disease       | 371  | 51 | 49 |                                                   |
| RN0220 | 53035  | Caroli disease                            | 61   | 51 | 49 | Slightly predominant in F                         |
| RFG110 | 1871   | Progressive cone dystrophy                | 124  | 51 | 49 |                                                   |
| RN1220 | 828    | Stickler syndrome                         | 85   | 51 | 49 |                                                   |
| RG0030 | 767    | Polyarteritis nodosa                      | 202  | 50 | 50 |                                                   |
| RFG110 | 827    | Stargardt disease                         | 492  | 50 | 50 |                                                   |
| RFG040 |        | Periodic ataxia                           | 16   | 50 | 44 |                                                   |
| RFG040 | 100    | Ataxia-telangiectasia                     | 48   | 50 | 50 |                                                   |
| RNG040 | 1308   | C syndrome                                | 6    | 50 | 50 |                                                   |
| RFG010 | 135    | CACH (childhood ataxia with central ner   | 12   | 50 | 50 |                                                   |
| RCG050 | 187    | Citrullinemia                             | 10   | 50 | 50 |                                                   |
| RN0270 | 3181   | Sprengel deformity                        | 6    | 50 | 50 |                                                   |
| RFG130 | 137672 | Pellucid marginal degeneration            | 6    | 50 | 50 |                                                   |
| RFG040 | 1173   | Cerebellar ataxia-hypogonadism            | 18   | 50 | 50 |                                                   |
| RCG060 |        | Congenital disorder of glycosylation      | 6    | 50 | 50 |                                                   |
| RFG080 |        | Erb dystrophy                             | 46   | 50 | 50 |                                                   |
| RFG090 | 606    | Proximal myotonic myopathy                | 26   | 50 | 50 |                                                   |
| RF0250 | 215    | Congenital stationary night blindness     | 16   | 50 | 50 |                                                   |
| RP0070 |        | Congenital hepatic fibrosis               | 52   | 50 | 50 |                                                   |
| RN0260 | 294975 | Phocomelia                                | 46   | 50 | 50 |                                                   |
| RCG040 | 470    | Lysinuric protein intolerance             | 4    | 50 | 50 |                                                   |
| RCG150 |        | Non-Langerhans cell histiocytosis         | 10   | 50 | 50 |                                                   |
| RFG010 | 2478   | Megalencephalic leukoencephalopathy       | 8    | 50 | 50 |                                                   |
| RN0670 | 281    | Cri du chat syndrome                      | 60   | 50 | 50 |                                                   |
| RF0010 | 726    | Alpers syndrome                           | 16   | 50 | 50 |                                                   |
| RFG060 | 773    | Refsum disease                            | 4    | 50 | 50 |                                                   |
| RFG090 |        | Thomsen disease                           | 68   | 50 | 50 |                                                   |
| RFG050 | 83330  | Werdnig-Hoffman disease                   | 20   | 50 | 50 | Slightly predominant in M                         |
| RCG040 | 26     | Methylmalonic acidemia with homocyst      | 16   | 50 | 50 |                                                   |
| RCG140 | 582    | Mucopolysaccharidosis type 4              | 20   | 50 | 50 |                                                   |
| RFG060 |        | Hereditary sensory neuropathy             | 12   | 50 | 50 |                                                   |
| RN0140 |        | Pupillar membrane persistence             | 6    | 50 | 50 |                                                   |
| RDG030 | 274    | Bernard-Soulier syndrome                  | 6    | 50 | 50 |                                                   |
| RN0970 | 560    | Marshall syndrome                         | 4    | 50 | 50 |                                                   |
| RN1710 | 453    | Tay syndrome                              | 6    | 50 | 50 |                                                   |

|        |        |                                                              |      |    |    |                  |
|--------|--------|--------------------------------------------------------------|------|----|----|------------------|
| RN1750 | 3449   | Weill-Marchesani syndrome                                    | 4    | 50 | 50 |                  |
| RB0020 | 790    | Retinoblastoma                                               | 675  | 50 | 50 |                  |
| RFG060 | 166    | Charcot-Marie-Tooth disease                                  | 706  | 50 | 50 |                  |
| RN0170 | 1201   | Atresia of small intestine                                   | 93   | 49 | 49 |                  |
| RI0010 | 930    | Idiopathic achalasia                                         | 1941 | 49 | 50 |                  |
| RN1270 | 904    | Williams syndrome                                            | 490  | 49 | 51 |                  |
| RDG010 | 232    | Sickle cell anemia                                           | 573  | 49 | 50 |                  |
| RNG050 | 15?    | Achondroplasia                                               | 124  | 49 | 51 |                  |
| RC0200 | 60     | Congenital alpha-1-antitrypsin deficiency                    | 393  | 49 | 51 |                  |
| RFG110 |        | Retinitis pigmentosa                                         | 1633 | 49 | 51 |                  |
| RN0910 | 374    | Goldenhar syndrome                                           | 260  | 49 | 51 |                  |
| RCG040 |        | Cystinosis                                                   | 43   | 49 | 51 |                  |
| RCG150 |        | Histiocytosis X                                              | 291  | 49 | 51 |                  |
| RCG070 | 909    | Cerebrotendinous xanthomatosis                               | 68   | 49 | 51 |                  |
| RDG010 | 124    | Blackfan-Diamond anemia                                      | 66   | 48 | 52 |                  |
| RCG160 | 567    | Di George syndrome                                           | 427  | 48 | 52 |                  |
| RN0040 | 475    | Joubert syndrome                                             | 120  | 48 | 52 |                  |
| RN0570 |        | Epidermolysis bullosa                                        | 358  | 48 | 52 |                  |
| RCG040 | 238583 | Hyperphenylalaninemia                                        | 673  | 48 | 52 |                  |
| RF0230 | 263479 | Fuchs heterochromic iridocyclitis                            | 267  | 48 | 52 |                  |
| RCG070 |        | Homozygous familial hypercholesterolemia                     | 48   | 48 | 52 |                  |
| RN1310 | 739    | Prader-Willi syndrome                                        | 591  | 48 | 52 |                  |
| RCG070 |        | Disorders of fatty acid oxidation and ketone body metabolism | 117  | 48 | 52 |                  |
| RL0020 | 1656   | Dermatitis herpetiformis                                     | 379  | 48 | 52 |                  |
| RN1350 |        | Alagille syndrome                                            | 101  | 48 | 52 |                  |
| RFG110 |        | Usher Syndrome                                               | 40   | 48 | 53 |                  |
| RCG070 |        | Beta-oxidation deficiency                                    | 19   | 47 | 53 |                  |
| RNG030 | 87     | Apert syndrome                                               | 19   | 47 | 53 |                  |
| RCG060 |        | Glycogen storage disease                                     | 376  | 47 | 52 |                  |
| RDG010 | 822    | Hereditary spherocytosis                                     | 712  | 47 | 53 |                  |
| RFG110 | 1243   | Best vitelliform macular dystrophy                           | 146  | 47 | 53 | 1:3              |
| RN0090 |        | Axfield-Rieger anomaly                                       | 34   | 47 | 53 |                  |
| RNG070 | 634    | Netherton syndrome                                           | 17   | 47 | 53 |                  |
| RN1760 | 912    | Zellweger syndrome                                           | 17   | 47 | 53 |                  |
| RN1210 | 819    | Smith-Magenis syndrome                                       | 66   | 47 | 53 |                  |
| RN0760 | 2869   | Peutz-Jeghers syndrome                                       | 81   | 47 | 53 |                  |
| RB0050 | 733    | Familial adenomatous polyposis                               | 828  | 47 | 53 |                  |
| RCG010 |        | Conn syndrome                                                | 30   | 47 | 53 |                  |
| RCG110 |        | Erythropoietic protoporphyria                                | 30   | 47 | 53 |                  |
| RN1240 | 857    | Townes-Brocks syndrome                                       | 15   | 47 | 53 |                  |
| RN0520 | 910    | Xeroderma pigmentosum                                        | 30   | 47 | 53 |                  |
| RN1300 | 72     | Angelman syndrome                                            | 271  | 46 | 54 |                  |
| RN1490 |        | Isaacs syndrome                                              | 28   | 46 | 54 |                  |
| RF0150 | 2073   | Narcolepsy                                                   | 610  | 46 | 54 |                  |
| RN0560 | 1775   | Dyskeratosis congenita                                       | 13   | 46 | 54 |                  |
| RF0030 | 506    | Leigh syndrome                                               | 185  | 46 | 54 |                  |
| RN0320 | 2368   | Gastroschisis                                                | 72   | 46 | 53 |                  |
| RN1320 | 558    | Marfan syndrome                                              | 1524 | 46 | 54 |                  |
| RFG140 |        | Cogan dystrophy                                              | 11   | 45 | 55 |                  |
| RCG040 | 293355 | Methylmalonic acidemia                                       | 11   | 45 | 55 |                  |
| RN1730 | 893    | WAGR syndrome                                                | 11   | 45 | 55 |                  |
| RN1080 | 813    | Silver-Russell syndrome                                      | 130  | 45 | 55 |                  |
| RF0140 | 3451   | West syndrome                                                | 627  | 45 | 55 | Predominant in M |
| RCG040 |        | Oculocutaneous albinism                                      | 148  | 45 | 55 |                  |
| RFG090 | 273    | Steinert myotonic dystrophy                                  | 526  | 45 | 55 |                  |
| RC0180 | 205    | Crigler-Najjar syndrome                                      | 51   | 45 | 55 |                  |
| RFG010 | 51     | Aicardi-Goutieres syndrome                                   | 20   | 45 | 55 |                  |
| RN0860 | 3157   | De Morsier syndrome                                          | 76   | 45 | 54 |                  |
| RFG080 | 269    | Landouzy-Dejerine dystrophy                                  | 293  | 45 | 55 |                  |
| RN0660 | 870    | Down syndrome                                                | 3213 | 45 | 55 |                  |
| RCG060 | 352    | Galactosemia                                                 | 65   | 45 | 55 |                  |
| RF0100 | 803    | Amyotrophic lateral sclerosis                                | 8184 | 45 | 55 | 1:1.5            |
| RCG160 | 331223 | Iper-Ige syndrome                                            | 9    | 44 | 56 |                  |
| RFG040 | 1168   | Ataxia with oculomotor apraxia                               | 9    | 44 | 56 |                  |
| RNG060 | 289    | Ellis-Van Creveld syndrome                                   | 9    | 44 | 56 |                  |

|        |        |                                            |       |    |    |                             |
|--------|--------|--------------------------------------------|-------|----|----|-----------------------------|
| RNG040 | 2108   | Hallermann-Streiff syndrome                | 9     | 44 | 56 | X-linked dominant           |
| RN0470 | 669    | Otopalatodigital syndrome                  | 9     | 44 | 56 |                             |
| RFG040 |        | Hereditary spastic paraplegia              | 475   | 44 | 56 |                             |
| RFG110 | 65     | Leber congenital amaurosis                 | 122   | 44 | 56 |                             |
| RCG040 | 214    | Cystinuria                                 | 77    | 44 | 56 |                             |
| RN0100 | 708    | Peters anomaly                             | 25    | 44 | 56 |                             |
| RN0890 | 2053   | Freeman-Sheldon syndrome                   | 16    | 44 | 56 |                             |
| RN0930 | 392    | Holt-Oram syndrome                         | 32    | 44 | 56 |                             |
| RCG040 |        | Organic acidemias and primary lactic aci   | 197   | 44 | 56 |                             |
| RC0150 | 905    | Wilson disease                             | 607   | 43 | 57 |                             |
| RFG060 | 640    | Tomaculous neuropathy                      | 144   | 43 | 57 | Autosomal dominant          |
| RDG020 | 98880  | Afibrinogenemia                            | 7     | 43 | 57 | One form X-linked recessive |
| RFG140 | 98625  | Superficial corneal dystrophy              | 7     | 43 | 57 |                             |
| RFG010 | 141    | Canavan disease                            | 7     | 43 | 57 |                             |
| RN1740 | 899    | Walker-Warburg syndrome                    | 7     | 43 | 57 |                             |
| RP0040 | 1915   | Fetal alcohol syndrome                     | 87    | 43 | 57 |                             |
| RF0130 | 2382   | Lennox-Gastaut syndrome                    | 422   | 42 | 58 |                             |
| RG0010 |        | Rheumatic endocarditis                     | 600   | 42 | 58 |                             |
| RCG040 | 56     | Alkaptonuria                               | 38    | 42 | 58 |                             |
| RN0390 | 380    | Greig cephalopolysyndactyly syndrome       | 19    | 42 | 58 |                             |
| RN1010 | 648    | Noonan syndrome                            | 714   | 42 | 58 |                             |
| RN1140 | 107    | Branchio-oto-renal syndrome                | 43    | 42 | 58 |                             |
| RN0880 | 1896   | EEC syndrome                               | 164   | 41 | 59 |                             |
| RC0010 | 199296 | Congenital isolated ACTH deficiency        | 138   | 41 | 59 |                             |
| RFG050 | 83419  | Kugelberg-Welander disease                 | 34    | 41 | 59 |                             |
| RF0190 | 43393  | Lambert-Eaton syndrome                     | 56    | 41 | 59 |                             |
| RN0430 | 2911   | Poland syndrome                            | 475   | 41 | 59 | Predominant in M            |
| RN0190 | 96346  | Anorectal malformation                     | 519   | 41 | 59 |                             |
| RFG040 |        | Idiopathic spinocerebellar ataxia          | 44    | 41 | 59 |                             |
| RFG070 |        | Centronuclear myopathy                     | 27    | 41 | 56 |                             |
| RFG080 | 1876   | Oculogastrointestinal muscular dystroph    | 52    | 40 | 60 |                             |
| RN1250 | 887    | VACTERL/VATER association                  | 102   | 40 | 60 |                             |
| RN1650 | 404560 | Familial dysplastic nevus syndrome         | 219   | 40 | 60 |                             |
| RF0050 | 101    | Dentatorubral pallidoluysian atrophy       | 5     | 40 | 60 |                             |
| RCG070 |        | Carnitine palmitoyltransferase deficienc   | 10    | 40 | 60 |                             |
| RN0530 |        | Keratosis follicularis spinulosa decalvans | 10    | 40 | 60 |                             |
| RC0070 | 309845 | Disorder of zinc metabolism                | 5     | 40 | 60 |                             |
| RCG080 | 75234  | Cholesterol ester storage disease          | 5     | 40 | 60 |                             |
| RM0050 |        | Diffuse fasciitis                          | 10    | 40 | 60 |                             |
| RDG020 | 331    | Factor XIII deficiency                     | 5     | 40 | 60 |                             |
| RCG070 | 650    | Lecithin-cholesterol acyltransferase defi  | 5     | 40 | 60 |                             |
| RI0070 | 2290   | Microvillus inclusion disease (MVID)       | 10    | 40 | 60 | 1:1.5                       |
| RF0210 | 40923  | Eales disease                              | 20    | 40 | 60 | Predominant in M            |
| RCG140 | 583    | Mucopolysaccharidosis type 6               | 5     | 40 | 60 |                             |
| RN0160 |        | Esophageal atresia and/or Isolated tract   | 326   | 40 | 60 |                             |
| RI0050 | 171    | Primary sclerosing cholangitis             | 502   | 40 | 60 | 1:2                         |
| RN0030 |        | Cerebellar agenesis                        | 28    | 39 | 61 |                             |
| RCG010 | 112    | Bartter syndrome                           | 74    | 39 | 61 |                             |
| RI0030 | 2070   | Eosinophilic gastroenteritis               | 187   | 39 | 61 |                             |
| RN0940 | 2322   | Kabuki make-up syndrome                    | 152   | 39 | 61 |                             |
| RCG070 | 31150  | Tangier disease                            | 13    | 38 | 62 |                             |
| RN1380 | 110    | Bardet-Biedl syndrome                      | 65    | 38 | 62 |                             |
| RFG050 | 83418  | Spinal muscular atrophy type 2             | 13    | 38 | 62 |                             |
| RG0060 | 375    | Goodpasture syndrome                       | 29    | 38 | 62 |                             |
| RF0070 | 36899  | Myoclonus-dystonia syndrome                | 16    | 38 | 63 |                             |
| RN0870 | 235    | Dubowitz syndrome                          | 16    | 38 | 63 |                             |
| RF0300 | 104    | Leber hereditary optic neuropathy          | 427   | 37 | 63 |                             |
| RG0040 | 2331   | Kawasaki disease                           | 1088  | 37 | 63 |                             |
| RCG070 | 31154  | Familial hypobetalipoproteinemia           | 48    | 37 | 63 |                             |
| RP0050 | 70590  | Infantile apnea                            | 166   | 37 | 63 |                             |
| RFG010 | 58     | Alexander disease                          | 11    | 36 | 64 |                             |
| RF0280 | 156071 | Keratoconus                                | 11022 | 36 | 64 |                             |
| RN0280 | 950    | Acrodysostosis                             | 14    | 36 | 64 |                             |
| RCG050 | 247525 | Argininosuccinate synthase deficiency      | 14    | 36 | 64 |                             |
| RFG010 | 702    | Pelizaeus-Merzbacher disease               | 17    | 35 | 65 | Predominant in M            |

|        |        |                                        |      |    |     |                              |
|--------|--------|----------------------------------------|------|----|-----|------------------------------|
| RN0410 | 2311   | Jarcho-Levin syndrome                  | 17   | 35 | 65  |                              |
| RFG070 | 98909  | Desmin-related myofibrillar myopathy   | 11   | 35 | 65  |                              |
| RN1590 | 884    | Pallister-Killian syndrome             | 26   | 35 | 65  |                              |
| RN1040 | 710    | Pfeiffer syndrome                      | 32   | 34 | 66  |                              |
| RNG060 |        | Fairbank disease                       | 6    | 33 | 67  |                              |
| RDG020 | 328    | Factor X deficiency                    | 9    | 33 | 67  | Autosomal recessive          |
| RFG010 | 487    | Krabbe disease                         | 24   | 33 | 67  |                              |
| RCG040 |        | Tyrosinemia                            | 12   | 33 | 67  |                              |
| RJ0020 | 49041  | Retroperitoneal fibrosis               | 343  | 32 | 67  |                              |
| RF0180 | 2932   | Chronic inflammatory demyelinating po  | 1749 | 32 | 68  |                              |
| RFG110 |        | Vitreoretinal degeneration             | 30   | 30 | 70  |                              |
| RP0060 | 415286 | Bilirubin encephalopathy               | 10   | 30 | 70  |                              |
| RFG090 |        | Becker Disease                         | 10   | 30 | 70  |                              |
| RN1520 | 98818  | Landau-Kleffner syndrome               | 27   | 30 | 70  | 1:2                          |
| RN1100 | 808    | Seckel syndrome                        | 17   | 29 | 71  |                              |
| RDG010 |        | Favism                                 | 768  | 29 | 71  |                              |
| RCG070 | 309015 | Familial lipoprotein lipase deficiency | 14   | 29 | 71  |                              |
| RNG060 | 1522   | Cranio metaphyseal dysplasia           | 14   | 29 | 71  |                              |
| RFG080 | 97242  | Congenital muscular dystrophy          | 14   | 29 | 71  |                              |
| RA0010 | 548    | Hansen disease (Leprosy)               | 21   | 29 | 71  |                              |
| RCG060 | 61     | Mannosidosis                           | 7    | 29 | 71  |                              |
| RN1430 | 220    | Denys-Drash syndrome                   | 7    | 29 | 71  |                              |
| RN1170 | 744    | Proteus syndrome                       | 21   | 29 | 71  |                              |
| RF0200 | 891    | Familial exudative vitreoretinopathy   | 127  | 28 | 71  | One form predominant in M    |
| RNG040 |        | Primary craniosynostosis               | 447  | 27 | 73  |                              |
| RN0400 | 1540   | Jackson-Weiss syndrome                 | 15   | 27 | 73  |                              |
| RN0200 | 388    | Hirschsprung disease                   | 323  | 26 | 74  |                              |
| RA0020 | 3452   | Whipple disease                        | 62   | 26 | 74  | -- (6)                       |
| RCG040 |        | Glutaric aciduria                      | 4    | 25 | 75  |                              |
| RCG050 | 90     | Arginase deficiency                    | 4    | 25 | 75  |                              |
| RFG040 |        | Congenital ataxia                      | 4    | 25 | 75  |                              |
| RN0800 | 83     | Antley-Bixler syndrome                 | 4    | 25 | 75  |                              |
| RN1610 | 2905   | POEMS syndrome                         | 32   | 25 | 75  | 1:2.5                        |
| RFG050 | 83420  | Spinal muscular atrophy type 4         | 4    | 25 | 75  |                              |
| RCG100 |        | Hereditary hemochromatosis             | 1418 | 24 | 76  |                              |
| RN1330 | 908    | Fragile X syndrome                     | 479  | 24 | 76  | X-linked dominant (7)        |
| RDG030 | 849    | Glanzmann thrombasthenia               | 13   | 23 | 77  |                              |
| RCG070 |        | Familial hypertriglyceridemia          | 35   | 23 | 77  |                              |
| RF0120 |        | Adrenoleukodystrophy                   | 189  | 23 | 77  |                              |
| RN1400 | 191    | Cockayne syndrome                      | 9    | 22 | 78  |                              |
| RCG160 | 183669 | Agammaglobulinemia                     | 111  | 22 | 78  |                              |
| RFG050 | 65684  | Hirayama disease                       | 5    | 20 | 80  | 1:20                         |
| RN0490 | 3447   | Weaver syndrome                        | 10   | 20 | 80  |                              |
| RFG080 | 98895  | Becker muscular dystrophy              | 221  | 19 | 81  | Predominant in M             |
| RD0050 | 379    | Chronic granulomatous disease          | 87   | 18 | 82  |                              |
| RQ0010 | 221117 | Gerstmann syndrome                     | 6    | 17 | 83  |                              |
| RN1070 | 97360  | Robinow syndrome                       | 6    | 17 | 83  |                              |
| RC0020 | 478    | Kallmann syndrome                      | 509  | 16 | 84  | 1:5                          |
| RCG110 | 101330 | Porphyria cutanea tarda                | 53   | 15 | 85  | Predominant in M             |
| RN1020 |        | Opitz syndrome                         | 20   | 15 | 85  |                              |
| RN1640 | 1466   | COFS syndrome                          | 7    | 14 | 86  |                              |
| RN1120 |        | Simpson-Golabi-Behmel syndrome         | 7    | 14 | 86  |                              |
| RN0620 | 2796   | Pachydermoperiostosis                  | 15   | 13 | 87  | 1:7                          |
| RFG050 | 481    | Kennedy disease                        | 51   | 12 | 88  | X-linked recessive           |
| RDG020 | 98879  | Hemophilia B                           | 271  | 11 | 89  | Predominant in M             |
| RJ0010 | 223    | Nephrogenic diabetes insipidus         | 66   | 11 | 89  |                              |
| RN0790 | 915    | Aarskog-Scott syndrome                 | 38   | 8  | 92  | Predominant in M             |
| RDG020 | 98878  | Hemophilia A                           | 1577 | 7  | 93  | Predominant in M             |
| RFG080 | 98896  | Duchenne muscular dystrophy            | 258  | 5  | 95  | Predominant in M             |
| RNG070 | 461    | Recessive X-linked ichthyosis          | 65   | 3  | 97  | Almost exclusively in M      |
| RN0690 |        | Klinefelter syndrome                   | 2071 | 0  | 100 |                              |
| RDG020 | 330    | Factor XII deficiency                  | 4    | 0  | 100 |                              |
| RCG070 | 425    | Familial hypoalphalipoproteinemia      | 4    | 0  | 100 |                              |
| RCG120 | 510    | Lesch-Nyhan disease                    | 12   | 0  | 100 | Severe form predominant in M |

|        |     |                              |    |   |     |                         |
|--------|-----|------------------------------|----|---|-----|-------------------------|
| RCG040 | 534 | Lowe syndrome                | 5  | 0 | 100 | Almost exclusively in M |
| RN1580 | 649 | Norrie disease               | 5  | 0 | 100 | Almost exclusively in M |
| RCG140 | 580 | Mucopolysaccharidosis type 2 | 27 | 0 | 100 | Almost exclusively in M |
| RN1000 | 245 | Nager syndrome               | 4  | 0 | 100 |                         |

#### Comments

- (1) The cases reported to RNMR show an age at onset spanning from birth to 82 years
- (2) In a cohort of 529 patients, a mild phenotype was more frequent in females, while a severe phenotype was more frequent in males [27]. The difference between our and literature data reported by Orphanet may depend on population selection biases.
- (3) Higher prevalence in males is observed after onset age 37 months [28]. Our 13 cases show an onset age less than 6 months.
- (4) Autosomal, usually dominant. A child has 50% risk of inherit the disease with this mode of inheritance [29].
- (5) Males are more severely affected [30]. A study could not exclude X-linked dominant inheritance [31]. These studies can justify the higher frequency of registered males with the disease.
- (6) F:M 1:4, increasing in F with time [26]
- (7) A French study reported a ratio of about 1:3 (F:M) in the molecular diagnosis of the disease, in line with our findings [32].

#### References

- [26] Dutly F., Altwegg M. Whipple's Disease and "Tropheryma whippelii". *Clin Microbiol Rev* **2001**, *14*, 561–583.
- [27] Pedrini E., Jennes I., Tremosini M., Milanesi A., Mordenti M., Parra A., Sgariglia F., Zuntini M., Campanacci L., Fabbri N., Pignotti E., Wuyts W., Sangiorgi L. Genotype-phenotype correlation study in 529 patients with multiple hereditary
- [28] Hausmanowa-Petrusewicz I., Zaremba J., Borkowska J., Szirkowiec W. Chronic proximal spinal muscular atrophy of childhood and adolescence: sex influence. *J Med Genet* **1984**, *21* (6), 447-50.
- [29] NIH-NCATS Best vitelliform macular dystrophy. Available online: <https://rarediseases.info.nih.gov/diseases/182/best-vitelliform-macular-dystrophy> (Accessed on November 2017)
- [30] OMIM Entry #162500 NEUROPATHY, HEREDITARY, WITH LIABILITY TO PRESSURE PALSIES; HNPP Available online at: <https://www.omim.org/entry/162500#clinicalFeatures> (Accessed on 5 November 2017)
- [31] Roos D., Thygesen P. Familial recurrent polyneuropathy: a family and a survey. *Brain* **1972**, *95*, 235-248.
- [32] Biancalana V., Beldjord C., Taillandier A., Szpiro-Tapia S., Cusin V., Gerson F., Philippe C., Mandel J.-L., French National Working Group on Fragile X Syndrome. Five years of molecular diagnosis of fragile X syndrome (1997-2001): a collaborative study reporting 95% of the activity in France. *Am J Med Genet* **2004**, *129A*, 218-224.
