# Supplementary material for: The Occurrence of 275 Rare Diseases and 47 Rare Disease Groups in Italy. Results from the National Registry of Rare Diseases
Source: MDPI journal article supplement (doi:10.3390/ijerph15071470), 2018-07-12
Supplement: s1 [file s1]

**Table S9. Regional incidence data**

Note: This table compares the medians of the distributions of regional incidences obtained by two notification practices active in the RNMR. The number of regions making up the distributions is also indicated.

| RNMR Code | ORPHA Code | Disease or Disease group                     | Number of Regions with incidence based on CD notifications | Median of regional incidences based on CD notifications | Number of Regions with incidence based on AD notifications | Median of regional incidences based on AD notifications |
|-----------|------------|----------------------------------------------|------------------------------------------------------------|---------------------------------------------------------|------------------------------------------------------------|---------------------------------------------------------|
| RA0020    | 3452       | Whipple disease                              | 5                                                          | 0.15                                                    | 5                                                          | 0.13                                                    |
| RA0030    | 91546      | Lyme disease                                 | 6                                                          | 0.31                                                    | 4                                                          | 0.26                                                    |
| RB0010    | 654        | Wilms tumor                                  | 9                                                          | 1.02                                                    | 6                                                          | 0.16                                                    |
| RB0040    | 79665      | Gardner syndrome                             | 2                                                          | 0.46                                                    | 1                                                          | 0.12                                                    |
| RB0050    | 733        | Familial adenomatous polyposis               | 11                                                         | 2.95                                                    | 7                                                          | 1.49                                                    |
| RB0060    | 538        | Lymphangioleiomyomatosis                     | 5                                                          | 0.27                                                    | 4                                                          | 0.46                                                    |
| RC0010    | 199296     | Congenital isolated ACTH deficiency          | 7                                                          | 0.40                                                    | 2                                                          | 0.15                                                    |
| RC0020    | 478        | Kallmann syndrome                            | 6                                                          | 1.90                                                    | 5                                                          | 0.51                                                    |
| RC0030    |            | Reifenstein syndrome                         | 2                                                          | 0.13                                                    | 2                                                          | 0.10                                                    |
| RC0040    | 169615     | Idiopathic central precocious puberty        | 8                                                          | 11.44                                                   | 8                                                          | 4.90                                                    |
| RC0060    | 902        | Werner syndrome                              | 2                                                          | 0.17                                                    | 1                                                          | 0.06                                                    |
| RC0080    |            | Total lipodystrophy                          | 4                                                          | 0.12                                                    | 6                                                          | 0.17                                                    |
| RC0090    | 36397      | Dercum disease                               | 2                                                          | 0.14                                                    | 6                                                          | 0.16                                                    |
| RC0100    | 333        | Farber Disease                               | 1                                                          | 0.58                                                    | 1                                                          | 0.03                                                    |
| RC0110    |            | Mixed cryoglobulinemia                       | 5                                                          | 1.49                                                    | 8                                                          | 0.95                                                    |
| RC0150    | 905        | Wilson disease                               | 7                                                          | 0.88                                                    | 4                                                          | 0.53                                                    |
| RC0160    | 436        | Hypophosphatasia                             | 1                                                          | 0.08                                                    | 2                                                          | 0.08                                                    |
| RC0170    |            | Vitamin D-resistant hypophosphatemic rickets | 2                                                          | 0.60                                                    | 6                                                          | 0.40                                                    |
| RC0180    | 205        | Crigler-Najjar syndrome                      | 1                                                          | 0.21                                                    | 4                                                          | 0.21                                                    |
| RC0190    | 91378      | Hereditary angioedema                        | 8                                                          | 1.59                                                    | 6                                                          | 0.68                                                    |
| RC0200    | 60         | Congenital alpha-1-antitrypsin deficiency    | 4                                                          | 1.83                                                    | 6                                                          | 0.31                                                    |
| RC0210    | 117        | Behçet disease                               | 4                                                          | 7.83                                                    | 6                                                          | 3.28                                                    |
| RD0010    |            | Hemolytic-uremic syndrome                    | 6                                                          | 0.53                                                    | 7                                                          | 0.45                                                    |
| RD0020    | 447        | Paroxysmal nocturnal hemoglobinuria          | 3                                                          | 0.41                                                    | 6                                                          | 0.31                                                    |
| RD0030    | 761        | Henoch-Schönlein purpura                     | 7                                                          | 1.06                                                    | 7                                                          | 1.01                                                    |
| RD0040    | 2686       | Cyclic neutropenia                           | 9                                                          | 0.42                                                    | 2                                                          | 0.07                                                    |
| RD0050    | 379        | Chronic granulomatous disease                | 4                                                          | 0.51                                                    | 5                                                          | 0.10                                                    |
| RF0010    | 726        | Alpers syndrome                              | 2                                                          | 0.25                                                    | 3                                                          | 0.06                                                    |
| RF0020    | 480        | Kearns-Sayre syndrome                        | 2                                                          | 0.53                                                    | 8                                                          | 0.34                                                    |
| RF0030    | 506        | Leigh syndrome                               | 4                                                          | 0.37                                                    | 5                                                          | 0.20                                                    |
| RF0040    | 778        | Rett syndrome                                | 2                                                          | 0.86                                                    | 7                                                          | 0.43                                                    |
| RF0060    | 98261      | Progressive myoclonic epilepsy               | 6                                                          | 0.30                                                    | 6                                                          | 0.19                                                    |
| RF0070    | 36899      | Myoclonus-dystonia syndrome                  | 1                                                          | 0.21                                                    | 1                                                          | 0.23                                                    |
| RF0080    | 399        | Huntington disease                           | 7                                                          | 4.60                                                    | 8                                                          | 1.28                                                    |
| RF0090    |            | Idiopathic torsion dystonia                  | 5                                                          | 1.05                                                    | 9                                                          | 1.06                                                    |

|        |        |                                      |    |       |    |       |
|--------|--------|--------------------------------------|----|-------|----|-------|
| RF0100 | 803    | Amyotrophic lateral sclerosis        | 8  | 25.96 | 9  | 15.01 |
| RF0110 | 35689  | Primary lateral sclerosis            | 3  | 0.54  | 10 | 0.64  |
| RF0120 |        | Adrenoleukodystrophy                 | 3  | 0.27  | 8  | 0.22  |
| RF0130 | 2382   | Lennox-Gastaut syndrome              | 9  | 0.77  | 3  | 0.40  |
| RF0140 | 3451   | West syndrome                        | 5  | 0.75  | 6  | 0.95  |
| RF0160 | 2483   | Melkersson-Rosenthal syndrome        | 4  | 0.25  | 3  | 0.06  |
| RF0170 | 240071 | Steele-Richardson-Olszewski disease  | 6  | 0.75  | 5  | 0.74  |
|        |        | Chronic inflammatory demyelinating   |    |       |    |       |
| RF0180 | 2932   | polyneuropathy                       | 11 | 2.69  | 8  | 2.22  |
| RF0190 | 43393  | Lambert-Eaton syndrome               | 3  | 0.14  | 6  | 0.14  |
| RF0200 | 891    | Familial exudative vitreoretinopathy | 4  | 0.60  | 6  | 0.21  |
| RF0210 | 40923  | Eales disease                        | 2  | 0.12  | 2  | 0.21  |
| RF0230 | 263479 | Fuchs heterochromic iridocyclitis    | 5  | 0.54  | 6  | 0.18  |
| RF0240 | 98981  | Essential iris atrophy               | 1  | 0.37  | 1  | 0.03  |
| RF0270 | 1467   | Cogan syndrome                       | 11 | 0.37  | 3  | 0.08  |
| RF0280 | 156071 | Keratoconus                          | 8  | 59.96 | 5  | 11.86 |
| RF0300 | 104    | Leber hereditary optic neuropathy    | 6  | 0.87  | 1  | 0.43  |
| RG0010 |        | Rheumatic endocarditis               | 7  | 2.86  | 7  | 1.13  |
| RG0020 | 727    | Microscopic polyangiitis             | 9  | 1.23  | 4  | 1.22  |
| RG0030 | 767    | Polyarteritis nodosa                 | 9  | 0.54  | 6  | 0.34  |
| RG0040 | 2331   | Kawasaki disease                     | 8  | 2.27  | 9  | 1.55  |
| RG0050 | 183    | Churg-Strauss syndrome               | 5  | 3.24  | 9  | 1.48  |
| RG0060 | 375    | Goodpasture syndrome                 | 2  | 0.41  | 3  | 0.15  |
| RG0070 | 900    | Wegener granulomatosis               | 8  | 3.27  | 7  | 1.04  |
| RG0080 | 397    | Giant cell arteritis                 | 6  | 7.69  | 7  | 2.54  |
| RG0090 | 3287   | Takayasu arteritis                   | 9  | 0.77  | 4  | 0.53  |
|        |        | Hereditary hemorrhagic               |    |       |    |       |
| RG0100 | 774    | telangiectasia                       | 4  | 5.12  | 2  | 2.16  |
| RG0110 | 131    | Budd-Chiari syndrome                 | 4  | 0.25  | 6  | 0.19  |
| RI0010 | 930    | Idiopathic achalasia                 | 4  | 4.89  | 3  | 6.04  |
| RI0030 | 2070   | Eosinophilic gastroenteritis         | 8  | 0.73  | 4  | 0.68  |
| RI0040 |        | Chronic intestinal pseudoobstruction | 7  | 0.33  | 2  | 0.37  |
| RI0050 | 171    | Primary sclerosing cholangitis       | 9  | 2.37  | 6  | 0.73  |
| RI0070 | 2290   | Microvillus inclusion disease (MVID) | 1  | 0.08  | 2  | 0.15  |
| RI0080 | 36204  | Intestinal lymphangiectasia          | 6  | 0.12  | 2  | 0.12  |
| RJ0010 | 223    | Nephrogenic diabetes insipidus       | 3  | 0.25  | 2  | 0.13  |
| RJ0020 | 49041  | Retroperitoneal fibrosis             | 9  | 1.05  | 4  | 0.74  |
| RJ0030 | 37202  | Interstitial cystitis                | 2  | 2.46  | 10 | 1.73  |
| RL0020 | 1656   | Dermatitis herpetiformis             | 8  | 1.33  | 8  | 0.37  |
| RL0030 |        | Pemphigus vulgaris                   | 8  | 5.67  | 11 | 2.58  |
| RL0040 |        | Bullous pemphigoid                   | 7  | 7.46  | 9  | 3.19  |
| RL0050 | 46486  | Mucous membrane pemphigoid           | 6  | 1.22  | 4  | 0.29  |
| RL0060 |        | Lichen sclerosus                     | 10 | 5.45  | 2  | 9.70  |
| RM0010 | 221    | Dermatomyositis                      | 8  | 3.36  | 5  | 1.44  |
| RM0020 | 732    | Polymyositis                         | 6  | 3.03  | 6  | 1.87  |
| RM0030 | 809    | Mixed connective tissue disease      | 7  | 3.36  | 10 | 1.11  |
| RM0040 | 3165   | Eosinophilic fasciitis               | 4  | 0.31  | 7  | 0.35  |
| RM0050 |        | Diffuse fasciitis                    | 2  | 0.37  | 1  | 0.03  |
| RM0060 | 728    | Relapsing polychondritis             | 7  | 0.41  | 5  | 0.20  |
| RN0010 |        | Arnold-Chiari malformation           | 6  | 7.13  | 8  | 3.97  |
| RN0020 | 199642 | Microcephaly                         | 6  | 0.57  | 5  | 0.51  |
| RN0030 |        | Cerebellar agenesis                  | 5  | 0.08  | 1  | 0.03  |
| RN0040 | 475    | Joubert syndrome                     | 6  | 0.31  | 5  | 0.17  |
| RN0050 |        | Lissencephaly                        | 3  | 0.57  | 7  | 0.17  |

|        |       |                                    |    |      |    |      |
|--------|-------|------------------------------------|----|------|----|------|
| RN0060 | 2162  | Holoprosencephaly                  | 3  | 0.07 | 6  | 0.16 |
| RN0080 | 1764  | Familial dysautonomia              | 2  | 0.38 | 2  | 0.14 |
| RN0090 |       | Axenfeld-Rieger anomaly            | 1  | 0.20 | 3  | 0.07 |
| RN0100 | 708   | Peters anomaly                     | 2  | 0.11 | 1  | 0.09 |
| RN0110 | 77    | Aniridia                           | 5  | 0.23 | 4  | 0.07 |
| RN0120 |       | Congenital colobomatous optic disc | 5  | 0.84 | 6  | 0.17 |
| RN0130 | 35737 | Morning glory syndrome             | 1  | 0.11 | 2  | 0.05 |
| RN0150 | 1059  | Blue rubber bleb nevus             | 1  | 0.06 | 2  | 0.05 |
|        |       | Esophageal atresia and/or Isolated |    |      |    |      |
| RN0160 |       | tracheo-esophageal fistula         | 8  | 0.83 | 6  | 1.14 |
| RN0170 | 1201  | Atresia of small intestine         | 7  | 0.33 | 5  | 0.12 |
| RN0180 | 1203  | Duodenal atresia                   | 5  | 0.37 | 4  | 0.17 |
| RN0190 | 96346 | Anorectal malformation             | 12 | 1.24 | 5  | 0.43 |
| RN0210 |       | Biliary atresia                    | 5  | 0.90 | 6  | 0.33 |
| RN0220 | 53035 | Caroli disease                     | 4  | 0.33 | 6  | 0.16 |
| RN0230 | 2924  | Polycystic liver disease           | 6  | 0.51 | 7  | 0.20 |
| RN0250 | 1309  | Medullary sponge kidney            | 5  | 0.53 | 7  | 0.20 |
| RN0290 |       | Camptodactyly                      | 3  | 0.08 | 1  | 0.25 |
| RN0310 | 2345  | Isolated Klippel-Feil syndrome     | 7  | 0.30 | 4  | 0.17 |
| RN0320 | 2368  | Gastroschisis                      | 5  | 0.30 | 2  | 0.23 |
| RN0330 | 98249 | Ehlers-Danlos syndrome             | 2  | 2.25 | 12 | 1.20 |
| RN0340 | 974   | Adams-Oliver syndrome              | 2  | 0.09 | 2  | 0.05 |
| RN0350 | 192   | Coffin-Lowry syndrome              | 2  | 0.38 | 1  | 0.03 |
| RN0370 | 239   | Dyggve-Melchior-Clausen disease    | 1  | 0.58 | 1  | 0.03 |
|        |       | Greig cephalopolysyndactyly        |    |      |    |      |
| RN0390 | 380   | syndrome                           | 2  | 0.17 | 3  | 0.09 |
| RN0400 | 1540  | Jackson-Weiss syndrome             | 1  | 0.75 | 2  | 0.12 |
| RN0410 | 2311  | Jarcho-Levin syndrome              | 3  | 0.16 | 1  | 0.12 |
| RN0430 | 2911  | Poland syndrome                    | 9  | 1.39 | 1  | 0.22 |
| RN0470 | 669   | Otopalatodigital syndrome          | 1  | 0.17 | 1  | 0.06 |
| RN0500 |       | Cutis laxa                         | 1  | 0.07 | 1  | 0.06 |
| RN0510 | 464   | Incontinentia pigmenti             | 4  | 0.12 | 3  | 0.09 |
| RN0520 | 910   | Xeroderma pigmentosum              | 2  | 0.07 | 2  | 0.05 |
|        |       | Cutis marmorata telangiectatica    |    |      |    |      |
| RN0540 | 1556  | congenita                          | 3  | 0.20 | 2  | 0.12 |
| RN0550 | 218   | Darier disease                     | 9  | 0.90 | 8  | 0.42 |
| RN0570 |       | Epidermolysis bullosa              | 8  | 0.90 | 7  | 0.35 |
|        |       | Progressive symmetric              |    |      |    |      |
| RN0580 | 316   | erythrokeratodermia                | 1  | 0.27 | 1  | 0.20 |
| RN0590 | 317   | Erythrokeratodermia variabilis     | 1  | 0.15 | 2  | 0.08 |
| RN0600 | 312   | Epidermolytic ichthyosis           | 6  | 0.09 | 1  | 0.12 |
| RN0610 | 2092  | Focal dermal hypoplasia            | 2  | 0.25 | 2  | 0.14 |
| RN0630 | 758   | Pseudoxanthoma elasticum           | 5  | 0.75 | 10 | 0.46 |
| RN0640 | 1114  | Aplasia cutis congenita            | 1  | 0.08 | 2  | 0.10 |
| RN0650 | 1214  | Parry-Romberg syndrome             | 6  | 0.17 | 2  | 0.16 |
| RN0660 | 870   | Down syndrome                      | 11 | 6.58 | 6  | 3.88 |
| RN0670 | 281   | Cri du chat syndrome               | 5  | 0.33 | 5  | 0.12 |
| RN0680 | 881   | Turner syndrome                    | 9  | 3.07 | 5  | 1.39 |
| RN0690 |       | Klinefelter syndrome               | 9  | 6.38 | 4  | 2.82 |
| RN0700 | 280   | Wolf-Hirschhorn syndrome           | 5  | 0.33 | 3  | 0.09 |
| RN0710 | 550   | MELAS                              | 2  | 0.66 | 9  | 0.57 |
| RN0720 | 551   | MERRF                              | 1  | 0.08 | 5  | 0.20 |
| RN0750 | 805   | Tuberous sclerosis                 | 8  | 1.56 | 7  | 1.16 |
| RN0760 | 2869  | Peutz-Jeghers syndrome             | 7  | 0.61 | 6  | 0.08 |
| RN0770 | 3205  | Sturge-Weber syndrome              | 6  | 0.25 | 2  | 0.15 |
| RN0780 | 892   | Von Hippel-Lindau disease          | 7  | 0.42 | 4  | 0.22 |

|        |        |                                        |    |      |    |      |
|--------|--------|----------------------------------------|----|------|----|------|
| RN0790 | 915    | Aarskog-Scott syndrome                 | 4  | 0.17 | 5  | 0.08 |
| RN0820 | 116?   | Beckwith-Wiedemann syndrome            | 9  | 0.82 | 8  | 0.35 |
| RN0850 | 138    | CHARGE syndrome                        | 6  | 0.63 | 5  | 0.15 |
| RN0860 | 3157   | De Morsier syndrome                    | 6  | 0.29 | 4  | 0.10 |
| RN0880 | 1896   | EEC syndrome                           | 5  | 0.75 | 8  | 0.27 |
| RN0890 | 2053   | Freeman-Sheldon syndrome               | 3  | 0.08 | 1  | 0.06 |
| RN0910 | 374    | Goldenhar syndrome                     | 10 | 0.76 | 1  | 0.50 |
| RN0930 | 392    | Holt-Oram syndrome                     | 5  | 0.21 | 2  | 0.17 |
| RN0940 | 2322   | Kabuki make-up syndrome                | 8  | 0.31 | 7  | 0.23 |
|        |        | Primary ciliary dyskinesia, Kartagener |    |      |    |      |
| RN0950 | 98861  | type                                   | 3  | 0.84 | 7  | 0.26 |
| RN0960 | 163634 | Maffucci syndrome                      | 5  | 0.20 | 2  | 0.06 |
| RN0990 | 570    | Moebius syndrome                       | 5  | 0.22 | 3  | 0.17 |
| RN1010 | 648    | Noonan syndrome                        | 6  | 2.28 | 6  | 0.71 |
| RN1040 | 710    | Pfeiffer syndrome                      | 2  | 0.12 | 1  | 0.15 |
| RN1080 | 813    | Silver-Russell syndrome                | 6  | 0.45 | 3  | 0.18 |
| RN1100 | 808    | Seckel syndrome                        | 2  | 0.09 | 1  | 0.03 |
| RN1120 |        | Simpson-Golabi-Behmel syndrome         | 2  | 0.07 | 1  | 0.08 |
| RN1130 | 1297   | Branchio-oculo-facial syndrome         | 2  | 0.07 | 2  | 0.11 |
| RN1140 | 107    | Branchio-oto-renal syndrome            | 5  | 0.30 | 4  | 0.09 |
| RN1150 | 1340   | Cardiofaciocutaneous syndrome          | 3  | 0.46 | 5  | 0.10 |
| RN1170 | 744    | Proteus syndrome                       | 4  | 0.19 | 3  | 0.08 |
| RN1180 | 324764 | Trichorhinophalangeal syndrome         | 5  | 0.27 | 3  | 0.17 |
| RN1190 | 2614   | Nail-patella syndrome                  | 5  | 0.27 | 3  | 0.10 |
| RN1200 |        | Smith-Lemli-Opitz syndrome type 1      | 2  | 0.27 | 2  | 0.16 |
| RN1210 | 819    | Smith-Magenis syndrome                 | 5  | 0.27 | 5  | 0.17 |
| RN1220 | 828    | Stickler syndrome                      | 4  | 0.23 | 6  | 0.21 |
| RN1240 | 857    | Townes-Brocks syndrome                 | 1  | 0.77 | 1  | 0.06 |
| RN1250 | 887    | VACTERL/VATER association              | 8  | 0.38 | 4  | 0.16 |
| RN1270 | 904    | Williams syndrome                      | 7  | 1.28 | 7  | 0.45 |
| RN1290 | 3463   | Wolfram syndrome                       | 6  | 0.08 | 1  | 0.09 |
| RN1300 | 72     | Angelman syndrome                      | 8  | 0.79 | 7  | 0.22 |
| RN1310 | 739    | Prader-Willi syndrome                  | 7  | 1.27 | 4  | 0.58 |
| RN1320 | 558    | Marfan syndrome                        | 5  | 1.90 | 9  | 1.13 |
| RN1330 | 908    | Fragile X syndrome                     | 6  | 1.42 | 11 | 0.91 |
| RN1350 |        | Alagille syndrome                      | 8  | 0.47 | 7  | 0.20 |
| RN1360 | 63     | Alport syndrome                        | 3  | 1.06 | 8  | 0.43 |
| RN1370 | 64     | Alström syndrome                       | 2  | 0.33 | 1  | 0.09 |
| RN1380 | 110    | Bardet-Biedl syndrome                  | 4  | 0.12 | 6  | 0.16 |
| RN1410 | 199    | Cornelia de Lange syndrome             | 7  | 0.23 | 8  | 0.17 |
|        |        | Congenital spondyloepiphyseal          |    |      |    |      |
| RN1450 | 94068  | dysplasia                              | 6  | 0.15 | 4  | 0.14 |
| RN1480 | 435    | Ito hypomelanosis                      | 3  | 0.16 | 5  | 0.08 |
| RN1490 |        | Isaacs syndrome                        | 1  | 0.65 | 5  | 0.08 |
| RN1510 | 90308  | Klippel-Trénaunay syndrome             | 8  | 0.66 | 5  | 0.25 |
| RN1520 | 98818  | Landau-Kleffner syndrome               | 2  | 0.10 | 1  | 0.08 |
| RN1530 | 500    | LEOPARD syndrome                       | 4  | 0.12 | 4  | 0.13 |
| RN1570 | 263440 | Neuroacanthocytosis                    | 2  | 0.11 | 1  | 0.06 |
| RN1590 | 884    | Pallister-Killian syndrome             | 3  | 0.17 | 1  | 0.08 |
| RN1620 | 783    | Rubinstein-Taybi syndrome              | 7  | 0.27 | 4  | 0.10 |
| RN1650 | 404560 | Familial dysplastic nevus syndrome     | 5  | 0.27 | 4  | 0.27 |
| RN1660 | 35125  | Epidermal nevus syndrome               | 3  | 0.21 | 4  | 0.09 |
| RN1670 |        | Multiple pterygium syndrome            | 1  | 0.37 | 2  | 0.06 |
| RN1700 | 816    | Sjögren-Larsson syndrome               | 4  | 0.93 | 4  | 0.35 |
| RN1720 | 3437   | Vogt-Koyanagi-Harada disease           | 6  | 0.35 | 8  | 0.24 |
| RN1750 | 3449   | Weill-Marchesani syndrome              | 2  | 0.07 | 1  | 0.25 |

|        |       |                                                                                                                                                                                                                                                |    |       |   |       |
|--------|-------|------------------------------------------------------------------------------------------------------------------------------------------------------------------------------------------------------------------------------------------------|----|-------|---|-------|
| RN1760 | 912   | Zellweger syndrome                                                                                                                                                                                                                             | 2  | 0.10  | 1 | 0.06  |
| RP0040 | 1915  | Fetal alcohol syndrome                                                                                                                                                                                                                         | 4  | 0.24  | 6 | 0.56  |
| RP0050 | 70590 | Infantile apnea                                                                                                                                                                                                                                | 5  | 1.06  | 2 | 0.07  |
| RP0070 |       | Congenital hepatic fibrosis                                                                                                                                                                                                                    | 2  | 0.37  | 3 | 0.08  |
| RBG010 |       | Neurofibromatoses                                                                                                                                                                                                                              | 10 | 12.49 | 5 | 5.44  |
| RCG010 |       | Primary hyperaldosteronisms                                                                                                                                                                                                                    | 8  | 2.28  | 6 | 0.92  |
| RCG020 |       | Congenital adrenogenital syndromes                                                                                                                                                                                                             | 9  | 3.84  | 4 | 1.03  |
| RCG030 |       | Autoimmune polyendocrinopathies                                                                                                                                                                                                                | 11 | 1.94  | 4 | 1.46  |
| RCG040 |       | Disturbances of aminoacid transport and metabolism                                                                                                                                                                                             | 8  | 7.18  | 5 | 4.08  |
| RCG050 |       | Urea cycle disturbances                                                                                                                                                                                                                        | 8  | 0.49  | 5 | 0.40  |
| RCG060 |       | Disturbances of carbohydrate transport and metabolism, excluded diabetes mellitus                                                                                                                                                              | 6  | 1.21  | 5 | 1.21  |
| RCG070 |       | Congenital alterations of lipoprotein metabolism, excluded: heterozygous familial hypercholesterolhaemia type IIa and IIb; polygenic primary hypercholesterolhaemia; combined familial hypercholesterolhaemia; Hyperlipoproteinhaemia type III | 5  | 3.16  | 7 | 0.91  |
| RCG080 |       | Lipid storage disturbances                                                                                                                                                                                                                     | 7  | 1.69  | 6 | 1.65  |
| RCG090 |       | Mucopolidoses                                                                                                                                                                                                                                  | 4  | 0.07  | 2 | 0.11  |
| RCG100 |       | Congenital alterations of iron metabolism                                                                                                                                                                                                      | 8  | 15.08 | 8 | 6.96  |
| RCG110 |       | Porphyrias                                                                                                                                                                                                                                     | 2  | 0.29  | 5 | 0.77  |
| RCG120 |       | Disorders of purine and pyrimidine metabolism                                                                                                                                                                                                  | 4  | 0.15  | 1 | 0.03  |
| RCG130 |       | Primary and familial amyloidoses                                                                                                                                                                                                               | 1  | 0.65  | 8 | 1.52  |
| RCG140 |       | Mucopolysaccharidoses                                                                                                                                                                                                                          | 7  | 0.63  | 2 | 0.25  |
| RCG150 |       | Chronic histiocytoses                                                                                                                                                                                                                          | 6  | 1.23  | 7 | 1.94  |
| RCG160 |       | Primary immunodeficiencies                                                                                                                                                                                                                     | 7  | 8.23  | 3 | 4.16  |
| RDG010 |       | Hereditary anemias                                                                                                                                                                                                                             | 8  | 25.78 | 5 | 7.54  |
| RDG020 |       | Hereditary coagulation defects                                                                                                                                                                                                                 | 9  | 23.01 | 9 | 26.65 |
| RDG030 |       | Hereditary thrombocytopathies                                                                                                                                                                                                                  | 10 | 0.60  | 7 | 0.12  |
| RDG040 |       | Primary hereditary thrombocytopenias                                                                                                                                                                                                           | 3  | 2.78  | 6 | 0.44  |
| RFG010 |       | Leucodystrophies                                                                                                                                                                                                                               | 7  | 0.65  | 7 | 0.37  |
| RFG020 |       | Ceroid lipofuscinoses                                                                                                                                                                                                                          | 3  | 0.65  | 5 | 0.23  |
| RFG030 |       | Gangliosidoses                                                                                                                                                                                                                                 | 6  | 0.15  | 4 | 0.10  |
| RFG040 |       | Spinocerebellar diseases                                                                                                                                                                                                                       | 2  | 13.78 | 4 | 3.72  |
| RFG050 |       | Spinal muscular atrophies                                                                                                                                                                                                                      | 5  | 2.59  | 9 | 1.07  |
| RFG060 |       | Hereditary neuropathies                                                                                                                                                                                                                        | 8  | 8.70  | 2 | 7.27  |
| RFG070 |       | Hereditary congenital miopathies                                                                                                                                                                                                               | 4  | 0.73  | 7 | 1.06  |
| RFG080 |       | Muscular dystrophies                                                                                                                                                                                                                           | 7  | 6.90  | 6 | 3.68  |
| RFG090 |       | Miotonic dystrophies                                                                                                                                                                                                                           | 7  | 4.60  | 9 | 2.51  |
| RFG100 |       | Normo-, hypo- and hyperkalemic paralyses                                                                                                                                                                                                       | 4  | 0.20  | 8 | 0.26  |
| RFG120 |       | Hereditary choroid dystrophies                                                                                                                                                                                                                 | 8  | 0.28  | 3 | 0.34  |
| RFG130 |       | Corneal degenerations                                                                                                                                                                                                                          | 8  | 0.50  | 4 | 0.16  |
| RFG140 |       | Hereditary corneal dystrophies                                                                                                                                                                                                                 | 7  | 1.94  | 5 | 0.50  |
| RGG010 |       | Thrombotic microangiopathies                                                                                                                                                                                                                   | 6  | 2.58  | 9 | 0.65  |
| RMG010 |       | Undifferentiated connective tissue syndromes                                                                                                                                                                                                   | 9  | 23.07 | 6 | 12.90 |

|        |                                              |   |                                        |      |      |
|--------|----------------------------------------------|---|----------------------------------------|------|------|
| RNG010 | Pseudohermaphroditisms                       | 5 | 0.37                                   | 7    | 0.23 |
| RNG020 | Multiple congenital arthrogryposes           | 7 | 0.23                                   | 4    | 0.29 |
| RNG030 | Acrocephalosyndactyly                        | 4 | 0.12                                   | 2    | 0.07 |
| RNG040 | Congenital craniofacial anomalies            | 6 | 8.19                                   | 3    | 2.82 |
| RNG060 | Congenital osteodystrophies                  | 7 | 3.47                                   | 2    | 3.66 |
| RNG070 | Congenital ichthyoses                        | 7 | 1.58                                   | 7    | 0.92 |
| RNG080 | Chromosomal aneuploidy syndromes             | 6 | 1.38                                   | 6    | 0.60 |
| RNG090 | Chromosomal duplication/deficiency syndromes | 7 | 11.45                                  | 9    | 3.72 |
|        |                                              |   | <b>Mean</b>                            | 2.05 | 1.04 |
|        |                                              |   | <b>SD</b>                              | 5.34 | 2.56 |
|        |                                              |   | <b>Pearson correlation coefficient</b> | 0.79 |      |
