# Supplementary material for: The Occurrence of 275 Rare Diseases and 47 Rare Disease Groups in Italy. Results from the National Registry of Rare Diseases
Source: MDPI journal article supplement (doi:10.3390/ijerph15071470), 2018-07-12
Supplement: s1 [file s1]

**Table S11. Comparison of Incidence data with literature data**

**Note:** This table lists the diseases showing a difference higher than an order of magnitude in the comparison with ORPHANET reported data and the results of an *ad hoc* literature survey.

| RNMR Code | ORPHA Code | Disease                             | Estimate of national incidence (/million) | ORPHANET reported incidence (/million) | Source | Comment |
|-----------|------------|-------------------------------------|-------------------------------------------|----------------------------------------|--------|---------|
| RA0010    | 548        | Hansen disease (Leprosy)            | 0.03                                      | 37                                     | [3]    | (1)     |
| RA0020    | 3452       | Whipple disease                     | 0.09                                      | 1                                      | [24]   | (2)     |
| RA0030    | 91546      | Lyme disease                        | 0.33                                      | 219                                    | [3]    | (3)     |
| RB0010    | 654        | Wilms tumor                         | 0.66                                      | 1.4                                    | [3]    |         |
| RB0020    | 790        | Retinoblastoma                      | 0.83                                      | 0.50                                   | [3]    |         |
| RB0060    | 538        | Lymphangioliomyomatosis             | 0.34                                      | 0.14                                   | [3]    |         |
| RD0020    | 447        | Paroxysmal nocturnal hemoglobinuria | 0.24                                      | 1.4                                    | [24]   |         |
| RD0030    | 761        | Henoch-Schönlein purpura            | 1.35                                      | 1                                      | [24]   |         |
| RF0080    | 399        | Huntington disease                  | 3.38                                      | 3.8                                    | [3]    |         |
| RF0100    | 803        | Amyotrophic lateral sclerosis       | 19.15                                     | 13.5                                   | [3]    |         |
| RF0130    | 2382       | Lennox-Gastaut syndrome             | 0.59                                      | 1                                      | [3]    |         |
| RG0020    | 727        | Microscopic polyangiitis            | 1.14                                      | 10                                     | [3]    |         |
| RG0030    | 767        | Polyarteritis nodosa                | 0.41                                      | 1                                      | [24]   |         |
| RG0040    | 2331       | Kawasaki disease                    | 2.08                                      | 80                                     | [24]   | (4)     |
| RG0050    | 183        | Churg-Strauss syndrome              | 1.88                                      | 1.8                                    | [3]    |         |
| RG0060    | 375        | Goodpasture syndrome                | 0.04                                      | 0.8                                    | [3]    |         |
| RG0070    | 900        | Wegener granulomatosis              | 1.77                                      | 8.5                                    | [3]    |         |
| RG0080    | 397        | Giant cell arteritis                | 3.73                                      | 40                                     | [24]   | (5)     |
| RG0090    | 3287       | Takayasu arteritis                  | 0.63                                      | 1.9                                    | [3]    |         |
| RI0010    | 930        | Idiopathic achalasia                | 4.63                                      | 7.7                                    | [3]    |         |
| RI0050    | 171        | Primary sclerosing cholangitis      | 1.03                                      | 6.5                                    | [3]    |         |
| RJ0020    | 49041      | Retroperitoneal fibrosis            | 0.72                                      | 3.5                                    | [3]    |         |
| RM0010    | 221        | Dermatomyositis                     | 1.87                                      | 5.5                                    | [3]    |         |
| RM0020    | 732        | Polymyositis                        | 1.95                                      | 5.85                                   | [3]    |         |
| RM0060    | 728        | Relapsing polychondritis            | 0.18                                      | 3.5                                    | [3]    | (6)     |
| RN0110    | 77         | Aniridia                            | 0.11                                      | 13                                     | [3]    |         |
| RN0220    | 53035      | Caroli disease                      | 0.13                                      | 1                                      | [3]    |         |
| RN1040    | 710        | Pfeiffer syndrome                   | 0.03                                      | 10                                     | [3]    | (7)     |
| RN1080    | 813        | Silver-Russell syndrome             | 0.29                                      | 155                                    | [3]    | (8)     |
| RN1320    | 558        | Marfan syndrome                     | 1.79                                      | 250                                    | [3]    | (9)     |
| RN1400    | 191        | Cockayne syndrome                   | 0.00                                      | 5                                      | [3]    | (10)    |
| RN1480    | 435        | Ito hypomelanosis                   | 0.10                                      | 108.5                                  | [3]    | (11)    |
| RN1720    | 3437       | Vogt-Koyanagi-Harada disease        | 0.20                                      | 2.5                                    | [24]   | (12)    |
| RP0010    | 290        | Congenital rubella syndrome         | 0.17                                      | 0.3                                    | [3]    |         |

## Comments

- (1) This disease is mainly localized in India and Brasil [24]. The value reported by ORPHANET refers to non-European Countries and very likely it is not a valid reference for the Italian population and RNMR results.
- (2) Whipple disease is associated with the presence of *Tropheryma whippelii* and environmental factors may influence the occurrence of the disease. Its incidence has been estimated equal to 0.6/million in the Swiss population [26], a value close to RNMR results.
- (3) This disease is a tick-borne bacterial infection caused by *Borrelia burgdorferi*. It is very likely that the sanitary conditions of the non-European populations, to which the published incidence of this disease refers, are not comparable with those of the Italian population.
- (4) This value refers to the age bracket 0-5y [24], which in Italy accounts for 4.6% of the population [33]. When this value is referred to the whole Italian population, the resulting incidence would be 3.68, in line with our estimate.
- (5) This value refers to the age bracket >50y [24], which acconts for 40,9% of the Italian population [33]. When referred to the whole Italian population, the resulting incidence would be 16,4, differing less than 3 times from our value.
- (6) A recent population-based study in UK [34] suggested that previous estimates could be too high and provided an incidence of 0,71 per million, which is rather comparable to ours.
- (7) The clinical features of Pfeiffer syndrome, characterized by a prenatal or neonatal onset and poor prognosis [24], suggest that the value reported as incidence is not referred to the general population and could even represent a birth prevalence.
- (8) Silver-Russel syndrome is characterized by a clear intrauterine growth retardation accompanied by postnatal growth deficiency [24]. These features make it very unlikely that the data reported here [3] represent the incidence in the general population. Moreover, this data is the mean of the range of values (1-30/100thousands) reported in the ORPHANET data sheets [24]. If these values would represent the birth prevalence, the lower limit would be in line with the birth prevalence reported in the Orphanet compilation as well as with our BP estimate.
- (9) The prevalence of Marfan syndrome has been recently determined in the Danish population where possible cases were re-evaluated according to diagnostic criteria revised in 2010 [35]. This study reported a median yearly incidence of 1.9/million, very close to our estimate.
- (10) Cockayne syndrome has been the subject of epidemiological studies in Western Europe [36] and Japan [37] and its incidence in births (birth prevalence in our paper) has been estimated at 2.7-2.8/million. A birth prevalence of 2/million is also reported in the same ORPHANET publication [3]. From these birth prevalence data, 2-3 cases would be expected in the Italian newborn population during the 2-year observation period, corresponding to an incidence of less than 0.03 in the general population. A prevalence of 0.4/million in the general Japan population has also been estimated [37]. Applying an average lifetime of 12 years [24], an incidence of 0.03/million would be expected. These comparisons make the lack of observation of Cockayne cases by RNMR rather compatible with literature data.

- (11) An incidence corresponding to the value reported by the ORPHANET compilation was calculated from the disease frequency among unselected patients in a children hospital [38]. Very likely the reported value is not representative of the general population.
- (12) The Vogt-Koyanagi-Harada disease affects individuals with darker pigmentation and those of Asian, Hispanic, or Native American origin [24]. This preferential distribution may explain the lower incidence of the disease found in the Italian population, with respect to the ORPHANET data attributed to non-European populations.

## References

- [3] ORPHANET. Prevalence and incidence of rare diseases: Bibliographic data Prevalence, incidence or number of published cases listed by diseases (in alphabetical order). ORPHANET Report Series N.1, June 2017. Available online: [http://www.orpha.net/orphacom/cahiers/docs/GB/Prevalence\\_of\\_rare\\_diseases\\_by\\_alphabetical\\_list.pdf](http://www.orpha.net/orphacom/cahiers/docs/GB/Prevalence_of_rare_diseases_by_alphabetical_list.pdf) (Accessed on 15 July 2017).
- [24] ORPHANET. Disease data sheets. Available online: [http://www.orpha.net/consor/cgi-bin/Disease\\_Search\\_Simple.php?lng=EN](http://www.orpha.net/consor/cgi-bin/Disease_Search_Simple.php?lng=EN) (Accessed on 3 April 2017).
- [26] Dutly F., Altwegg M. Whipple's Disease and "Tropheryma whippelii". Clin Microbiol Rev 2001, 14, 561–583.
- [33] ISTAT. Popolazione per età, sesso e stato civile 2013. Available online: <http://www.tuttitalia.it/statistiche/popolazione-eta-sesso-stato-civile-2013/> (Accessed on 10 November 2017).
- [34] Hazra N., Dregan A., Charlton J., Gulliford M.C., D'Cruz D.P. Incidence and mortality of relapsing polychondritis in the UK: a population-based cohort study. Rheumatology (Oxford). 2015, 54, 2181-7. doi: 10.1093/rheumatology/kev240. Epub 2015 Jul 17.
- [35] Groth K.A., Hove H., Kyhl K., Folkestad L., Gaustadnes M., Vejlstrup N., Stochholm K., Østergaard J.R., Andersen N.H., Gravholt C.H. Prevalence, incidence, and age at diagnosis in Marfan Syndrome. Orphanet J Rare Dis 2015, 10, 153. doi: 10.1186/s13023-015-0369-8.
- [36] Kleijer W.J., Laugel V., Berneburg M., Nardo T., Fawcett H., Gratchev A., Jaspers N.G., Sarasin A., Stefanini M., Lehmann A.R. Incidence of DNA repair deficiency disorders in western Europe: Xeroderma pigmentosum, Cockayne syndrome and trichothiodystrophy. DNA
- [37] Kubota M., Ohta S., Ando A., Koyama A., Terashima H., Kashii H., Hoshino H., Sugita K., Hayashi M. Nationwide survey of Cockayne syndrome in Japan: Incidence, clinical course and prognosis. Pediatr Int 2015, 57, 339-347. doi: 10.1111/ped.12635.
- [38] Pascual-Castroviejo I., Lopez-Rodriguez L., de la Cruz Medina M., Salamanca-Maesso C., Roche Herrero C. Hypomelanosis of Ito: neurological complications in 34 cases. Canad J Neurol Sci 1988, 15, 124-129.
