# Supplementary material for: The Occurrence of 275 Rare Diseases and 47 Rare Disease Groups in Italy. Results from the National Registry of Rare Diseases
Source: MDPI journal article supplement (doi:10.3390/ijerph15071470), 2018-07-12
Supplement: s1 [file s1]

|        |        |                                                               |        |         |         |        |        |        |         |         |         |         |
|--------|--------|---------------------------------------------------------------|--------|---------|---------|--------|--------|--------|---------|---------|---------|---------|
| RD0040 | 2686   | Cyclic neutropenia                                            | 0.1ad  | 0       | 0       | 0      | 0      | 0      | 0       | 0       | 0       | 0       |
| RD0050 | 379    | Chronic granulomatous disease                                 | 0.29m  | 0       | 0       | 0.57ad | 0      | 0      | 0       | 0       | 0       | 0       |
| RF0010 | 726    | Alpers syndrome                                               | 0.2cd  | 0       | 0       | 0      | 0      | 0      | 0       | 0       | 0       | 2.62cd  |
| RF0030 | 506    | Leigh syndrome                                                | 0.2ad  | 0       | 0       | 0.57ad | 0      | 0      | 0       | 0       | 0       | 0       |
| RF0040 | 778    | Rett syndrome                                                 | 0.1ad  | 0       | 0       | 0.57ad | 0      | 0      | 0       | 0       | 0       | 0       |
| RF0060 | 98261  | Progressive myoclonic epilepsy                                | 0.2cd  | 0       | 0       | 0      | 0      | 0      | 0       | 0       | 0       | 0       |
| RF0100 | 803    | Amyotrophic lateral sclerosis                                 | 0.2m   | 0       | 0       | 0      | 0      | 0      | 0       | 0       | 0       | 0       |
| RF0130 | 2382   | Lennox-Gastaut syndrome                                       | 0.1cd  | 0       | 0       | 0      | 0      | 0      | 0       | 0       | 0       | 1.31cd  |
| RF0140 | 3451   | West syndrome                                                 | 5.69m  | 0       | 0       |        | 0      | 0      | 4.66cd  | 21.32cd | 9.04cd  | 6.56cd  |
| RF0200 | 891    | Familial exudative vitreoretinopathy                          | 0.1cd  | 1.4cd   | 0       | 0      | 0      | 0      | 0       | 0       | 0       | 0       |
| RF0280 | 156071 | Keratoconus                                                   | 0.1cd  | 0       | 0       | 0      | 0      | 0      | 0       | 0       | 0       | 0       |
| RG0040 | 2331   | Kawasaki disease                                              | 4.31m  | 4.19ad  | 0       | 3.97ad | 0      | 0      | 4.66cd  | 5.33cd  | 4.52cd  |         |
| RG0100 | 774    | Hereditary hemorrhagic telangiectasia                         | 0.1cd  | 0       | 0       | 0      | 0      | 0      | 0       | 0       | 0       | 0       |
| RI0030 | 2070   | Eosinophilic gastroenteritis                                  | 0.29cd | 0       | 0       | 0      | 0      | 0      | 0       | 5.33cd  | 0       | 0       |
| RI0040 |        | Chronic intestinal pseudoobstruction                          | 0.1cd  | 0       | 0       | 0.57cd | 0      | 0      | 0       | 0       | 0       | 0       |
| RI0070 | 2290   | Microvillus inclusion disease (MVID)                          | 0.1ad  | 1.4ad   | 0       | 0      | 0      | 0      | 0       | 0       | 0       | 0       |
| RI0080 | 36204  | Intestinal lymphangiectasia                                   | 0.2cd  | 0       | 0       | 0      | 9.35cd | 0      | 1.17cd  | 0       | 0       | 0       |
| RL0040 |        | Bullous pemphigoid                                            | 0.1ad  | 0       | 0       | 0      | 0      | 0      | 0       | 0       | 0       | 0       |
| RN0010 |        | Arnold-Chiari malformation                                    | 1.86m  | 4.19ad  | 0       | 0.57ad | 0      | 0      | 2.33cd  | 0       | 0       | 1.31cd  |
| RN0020 | 199642 | Microcephaly                                                  | 0.29m  | 0       | 0       | 0      | 0      | 0      | 0       | 0       | 0       | 1.31cd  |
| RN0040 | 475    | Joubert syndrome                                              | 0.2m   | 0       | 0       | 0      | 0      | 0      | 1.17cd  | 0       | 0       | 0       |
| RN0050 |        | Lissencephaly                                                 | 1.08m  | 0       | 0       | 1.13ad | 0      | 0      | 1.17cd  | 0       | 0       | 1.31cd  |
| RN0060 | 2162   | Holoprosencephaly                                             | 0.59m  | 1.4ad   | 0       | 0      | 0      | 0      | 0       | 0       | 0       | 0       |
| RN0090 |        | Axenfeld-Rieger anomaly                                       | 0.1ad  | 0       | 0       | 0      | 0      | 0      | 0       | 0       | 0       | 0       |
| RN0100 | 708    | Peters anomaly                                                | 0.1cd  | 0       | 0       | 0      | 0      | 0      | 1.17cd  | 0       | 0       | 0       |
| RN0110 | 77     | Aniridia                                                      | 0.49m  | 0       | 0       | 0      | 0      | 0      | 0       | 0       | 0       | 2.62cd  |
| RN0120 |        | Congenital colobomatous optic disc                            | 0.69m  | 0       | 0       | 0      | 9.35cd | 9.74cd |         | 0       | 0       | 1.31cd  |
| RN0140 |        | Pupillar membrane persistence                                 | 0.1cd  | 0       | 0       | 0      | 0      | 0      | 0       | 0       | 0       | 1.31cd  |
| RN0160 |        | Esophageal atresia and/or Isolated tracheo-esophageal fistula | 6.67m  | 20.95ad | 46.17ad | 3.4ad  | 0      | 0      | 12.82cd | 15.99cd | 4.52cd  | 7.87cd  |
| RN0170 | 1201   | Atresia of small intestine                                    | 1.67m  | 8.38ad  | 0       | 0.57ad | 0      | 0      | 1.17cd  | 5.33cd  | 13.55cd | 0       |
| RN0180 | 1203   | Duodenal atresia                                              | 1.86m  | 12.57ad | 0       | 2.27ad | 0      | 0      | 2.33cd  | 0       | 4.52cd  | 2.62cd  |
| RN0190 | 96346  | Anorectal malformation                                        | 6.37m  | 15.36ad | 46.17ad | 1.7ad  | 9.35cd | 9.74cd | 18.65cd | 10.66cd | 27.11cd | 13.12cd |

|        |       |                                           |        |         |   |        |         |         |         |         |         |         |
|--------|-------|-------------------------------------------|--------|---------|---|--------|---------|---------|---------|---------|---------|---------|
| RN0200 | 388   | Hirschsprung disease                      | 4.22m  | 8.38ad  | 0 |        | 0       | 29.23cd | 9.32cd  | 15.99cd | 9.04cd  | 7.87cd  |
| RN0210 |       | Biliary atresia                           | 3.14m  | 1.4ad   | 0 | 1.7ad  | 0       | 0       |         | 5.33cd  | 9.04cd  | 2.62ad  |
| RN0310 | 2345  | Isolated Klippel-Feil syndrome            | 0.2cd  | 0       | 0 | 0      | 0       | 9.74cd  | 1.17cd  | 0       | 0       | 0       |
| RN0320 | 2368  | Gastroschisis                             | 1.18m  | 0       | 0 |        | 0       | 0       | 1.17cd  | 0       | 9.04cd  | 2.62cd  |
| RN0330 | 98249 | Ehlers-Danlos syndrome                    | 0.1ad  | 1.4ad   | 0 | 0      | 0       | 0       | 0       | 0       | 0       | 0       |
| RN0340 | 974   | Adams-Oliver syndrome                     | 0.2m   | 0       | 0 | 0      | 0       | 0       | 1.17cd  | 0       | 0       | 0       |
| RN0380 | 3255  | Filippi syndrome                          | 0.1ad  | 0       | 0 | 0      | 0       | 0       | 0       | 0       | 0       | 0       |
| RN0390 | 380   | Greig cephalopolysyndactyly syndrome      | 0.2ad  | 0       | 0 | 0      | 0       | 0       | 0       | 0       | 0       | 0       |
| RN0400 | 1540  | Jackson-Weiss syndrome                    | 0.1ad  | 0       | 0 | 0      | 0       | 0       | 1.17ad  | 0       | 0       | 0       |
| RN0410 | 2311  | Jarcho-Levin syndrome                     | 0.1cd  | 1.4cd   | 0 | 0      | 0       | 0       | 0       | 0       | 0       | 0       |
| RN0430 | 2911  | Poland syndrome                           | 1.27m  |         | 0 | 1.13cd | 0       | 0       | 0       | 5.33cd  | 0       | 0       |
| RN0470 | 669   | Otopalatodigital syndrome                 | 0.1ad  | 0       | 0 | 0      | 0       | 0       | 0       | 0       | 0       | 0       |
| RN0510 | 464   | Incontinentia pigmenti                    | 0.78m  | 2.79ad  | 0 | 0      | 0       | 0       | 0       | 0       | 0       | 3.93cd  |
| RN0540 | 1556  | Cutis marmorata telangiectatica congenita | 0.1cd  | 0       | 0 | 0      | 0       | 0       | 0       | 0       | 0       | 1.31cd  |
| RN0570 |       | Epidermolysis bullosa                     | 1.37m  | 0       | 0 | 0      | 0       | 0       | 1.17cd  | 5.33cd  | 0       | 1.31cd  |
| RN0640 | 1114  | Aplasia cutis congenita                   | 0.1ad  | 0       | 0 | 0      | 0       | 0       | 0       | 0       | 0       | 0       |
| RN0660 | 870   | Down syndrome                             | 35m    | 60.05ad | 0 |        | 168.3cd | 19.48cd | 60.61cd | 10.66cd | 40.66cd | 17.05cd |
| RN0670 | 281   | Cri du chat syndrome                      | 0.29m  | 0       | 0 | 0.57ad | 0       | 0       | 0       | 0       | 0       | 0       |
| RN0680 | 881   | Turner syndrome                           | 1.96m  | 0       | 0 | 0.57ad | 0       | 9.74cd  | 2.33cd  | 0       | 4.52cd  | 1.31cd  |
| RN0690 |       | Klinefelter syndrome                      | 2.65m  | 5.59ad  | 0 | 0.57ad | 9.35cd  | 0       | 5.83cd  | 5.33cd  | 4.52cd  | 6.56cd  |
| RN0700 | 280   | Wolf-Hirschhorn syndrome                  | 0.2m   | 0       | 0 | 0      | 0       | 0       | 0       | 0       | 0       | 0       |
| RN0710 | 550   | MELAS                                     | 0.59ad | 0       | 0 | 0      | 0       | 0       | 0       | 0       | 0       | 1.31ad  |
| RN0740 |       | Ivemark syndrome                          | 0.1cd  | 0       | 0 | 0      | 0       | 0       | 1.17cd  | 0       | 0       | 0       |
| RN0750 | 805   | Tuberous sclerosis                        | 2.84m  | 5.59ad  | 0 | 1.7ad  | 0       | 9.74cd  |         | 0       | 9.04cd  | 6.56cd  |
| RN0770 | 3205  | Sturge-Weber syndrome                     | 0.69m  | 1.4ad   | 0 | 0      | 0       | 0       | 2.33cd  | 0       | 0       | 1.31cd  |
| RN0790 | 915   | Aarskog-Scott syndrome                    | 0.1ad  | 0       | 0 | 0      | 0       | 0       | 0       | 0       | 0       | 0       |
| RN0810 | 1225  | Baller-Gerold syndrome                    | 0.1ad  | 0       | 0 | 0      | 0       | 0       | 0       | 0       | 0       | 0       |
| RN0820 | 116?  | Beckwith-Wiedemann syndrome               | 2.65m  | 6.98ad  | 0 | 0      | 9.35cd  | 0       | 4.66cd  | 0       | 0       | 2.62cd  |
| RN0850 | 138   | CHARGE syndrome                           | 1.18m  | 1.4ad   | 0 | 1.13ad | 0       | 0       | 1.17cd  | 5.33ad  | 9.04cd  | 1.31cd  |
| RN0860 | 3157  | De Morsier syndrome                       | 0.2ad  | 1.4ad   | 0 | 0      | 0       | 0       | 0       | 0       | 0       | 0       |
| RN0880 | 1896  | EEC syndrome                              | 0.59m  | 2.79ad  | 0 | 0      | 0       | 0       | 0       | 0       | 0       | 0       |
| RN0890 | 2053  | Freeman-Sheldon syndrome                  | 0.1cd  | 0       | 0 | 0      | 0       | 0       | 1.17cd  | 0       | 0       | 0       |
| RN0900 | 2059  | Fryns syndrome                            | 0.1cd  | 0       | 0 | 0      | 0       | 0       | 1.17cd  | 0       | 0       | 0       |

[illegible]

|        |                                                                                                                                                                                                                |        |         |   |         |         |         |          |         |         |         |
|--------|----------------------------------------------------------------------------------------------------------------------------------------------------------------------------------------------------------------|--------|---------|---|---------|---------|---------|----------|---------|---------|---------|
| RBG010 | Neurofibromatoses                                                                                                                                                                                              | 3.92m  | 8.38ad  | 0 | 3.4ad   | 0       | 0       | 3.5cd    | 10.66cd | 4.52cd  | 7.87cd  |
| RCG010 | Primary hyperaldosteronisms                                                                                                                                                                                    | 0.2m   | 0       | 0 | 0       | 0       | 0       | 0        | 0       | 4.52cd  | 0       |
| RCG020 | Congenital adrenogenital syndromes                                                                                                                                                                             | 3.14m  |         | 0 | 0.57ad  | 0       | 0       | 4.66cd   | 5.33cd  | 0       | 2.62cd  |
|        | Disturbances of aminoacid transport and metabolism                                                                                                                                                             |        |         |   |         |         |         |          |         |         |         |
| RCG040 |                                                                                                                                                                                                                | 30.1m  | 27.93ad | 0 | 31.74ad | 18.7cd  | 0       | 13.99cd  | 58.63cd |         | 20.98cd |
| RCG050 | Urea cycle disturbances                                                                                                                                                                                        | 1.18m  | 0       | 0 | 0       | 0       | 0       | 3.5cd    | 0       | 0       | 1.31ad  |
|        |                                                                                                                                                                                                                |        |         |   |         |         |         |          |         |         |         |
|        | Disturbances of carbohydrate transport and metabolism, excluded diabetes mellitus                                                                                                                              |        |         |   |         |         |         |          |         |         |         |
| RCG060 |                                                                                                                                                                                                                | 5.39m  | 6.98ad  | 0 | 4.53ad  | 0       | 0       |          | 0       | 0       | 6.56cd  |
|        |                                                                                                                                                                                                                |        |         |   |         |         |         |          |         |         |         |
|        | Congenital alterations of lipoprotein metabolism, excluded: heterozygous familial hypercholesterolhaemia type IIa and IIb; polygenic primary hypercholesterolhaemia; combined familial hypercholesterolhaemia; |        |         |   |         |         |         |          |         |         |         |
| RCG070 | Hyperlipoproteinemia type III                                                                                                                                                                                  | 3.82m  | 2.79ad  | 0 | 2.27ad  | 9.35cd  | 0       | 0        | 5.33cd  | 0       | 15.74cd |
| RCG080 | Lipid storage disturbances                                                                                                                                                                                     | 0.98m  | 1.4ad   | 0 | 1.13ad  | 0       | 0       | 0        | 5.33cd  | 0       | 0       |
| RCG090 | Mucopolysaccharidoses                                                                                                                                                                                          | 0.1ad  | 0       | 0 | 0       | 0       | 0       | 0        | 0       | 0       | 0       |
| RCG100 | Congenital alterations of iron metabolism                                                                                                                                                                      | 0.1cd  | 0       | 0 | 0       | 0       | 0       | 0        | 0       | 0       | 0       |
| RCG140 | Mucopolysaccharidoses                                                                                                                                                                                          | 0.2m   | 0       | 0 | 0       | 0       | 0       | 1.17cd   | 0       | 0       | 0       |
| RCG150 | Chronic histiocytoses                                                                                                                                                                                          | 0.59m  | 2.79ad  | 0 | 0       | 0       | 0       | 0        | 0       | 0       | 0       |
| RCG160 | Primary immunodeficiencies                                                                                                                                                                                     | 4.9m   | 4.19ad  | 0 | 3.97ad  | 9.35cd  | 0       |          | 5.33cd  | 0       | 2.62cd  |
| RDG010 | Hereditary anemias                                                                                                                                                                                             | 20.69m | 30.72ad | 0 | 2.27ad  | 28.05cd | 19.48cd | 103.74cc | 5.33cd  | 27.11cd | 38.03cd |
| RDG020 | Hereditary coagulation defects                                                                                                                                                                                 | 5.49m  | 11.17ad | 0 | 3.97ad  | 9.35cd  | 0       | 5.83cd   | 0       | 27.11cd | 6.56cd  |
| RDG030 | Hereditary thrombocytopathies                                                                                                                                                                                  | 0.1ad  | 1.4ad   | 0 | 0       | 0       | 0       | 0        | 0       | 0       | 0       |
| RDG040 | Primary hereditary thrombocytopenias                                                                                                                                                                           | 0.2m   | 1.4ad   | 0 | 0.57cd  | 0       | 0       | 0        | 0       | 0       | 0       |
| RFG010 | Leucodystrophies                                                                                                                                                                                               | 0.39m  | 0       | 0 | 0       | 0       | 0       | 1.17cd   | 0       | 0       | 0       |
| RFG030 | Gangliosidoses                                                                                                                                                                                                 | 0.78m  | 0       | 0 | 0.57ad  | 0       | 0       | 1.17cd   | 0       | 0       | 1.31cd  |
| RFG040 | Spinocerebellar diseases                                                                                                                                                                                       | 0.29ad | 0       | 0 | 0       | 0       | 0       | 0        | 0       | 0       | 0       |
| RFG050 | Spinal muscular atrophies                                                                                                                                                                                      | 3.24m  | 1.4ad   | 0 | 1.13ad  | 0       | 0       | 5.83cd   | 0       | 4.52cd  | 2.62cd  |
| RFG060 | Hereditary neuropathies                                                                                                                                                                                        | 0.59m  | 1.4ad   | 0 | 0       | 0       | 0       | 0        | 0       | 0       | 1.31cd  |
| RFG070 | Hereditary congenital miopathies                                                                                                                                                                               | 0.49m  | 0       | 0 | 0       | 0       | 0       | 1.17cd   | 0       | 0       | 0       |
| RFG080 | Muscular dystrophies                                                                                                                                                                                           | 1.57m  | 0       | 0 | 0.57ad  | 0       | 0       | 0        | 5.33cd  | 4.52cd  | 1.31ad  |

|        |                                              |        |         |   |        |        |        |         |         |         |         |
|--------|----------------------------------------------|--------|---------|---|--------|--------|--------|---------|---------|---------|---------|
| RFG090 | Miotonic dystrophies                         | 0.69m  | 0       | 0 | 0.57ad | 0      | 0      | 1.17cd  | 0       | 4.52cd  | 1.31cd  |
| RFG110 | Hereditary retinic dystrophies               | 1.08m  | 0       | 0 | 0      | 0      | 0      | 2.33cd  | 0       | 0       |         |
|        | Undifferentiated connective tissue           |        |         |   |        |        |        |         |         |         |         |
| RMG010 | syndromes                                    | 0.1ad  | 0       | 0 | 0      | 0      | 0      | 0       | 0       | 0       | 0       |
| RNG010 | Pseudohermaphroditisms                       | 1.08m  | 4.19ad  | 0 | 0.57ad | 0      | 0      | 1.17cd  | 0       | 0       | 1.31cd  |
| RNG020 | Multiple congenital arthrogryposes           | 0.69m  | 0       | 0 | 0      | 0      | 0      | 0       | 0       | 0       | 1.31cd  |
| RNG030 | Acrocephalosyndactyly                        | 0.1ad  | 0       | 0 | 0      | 0      | 0      | 0       | 0       | 0       | 0       |
| RNG040 | Congenital craniofacial anomalies            | 21.57m | 19.55ad | 0 | 13.6ad | 74.8cd |        | 72.27cd | 10.66cd |         | 41.97cd |
| RNG050 | Congenital chondrodystrophies                | 3.53m  | 12.57ad | 0 | 2.27ad | 9.35cd | 0      | 2.33cd  | 0       | 4.52cd  | 1.31cd  |
| RNG060 | Congenital osteodystrophies                  | 2.84m  | 5.59ad  | 0 | 0      | 9.35cd | 0      | 0       | 0       | 0       | 3.93cd  |
| RNG070 | Congenital ichthyoses                        | 2.94m  | 11.17ad | 0 | 0      | 0      | 9.74ad | 3.5cd   | 0       | 9.04cd  | 1.31cd  |
| RNG080 | Chromosomal aneuploidy syndromes             | 2.55m  | 4.19ad  | 0 | 2.27ad | 9.35cd | 0      | 1.17cd  | 0       | 0       | 0       |
|        | Chromosomal duplication/deficiency           |        |         |   |        |        |        |         |         |         |         |
| RNG090 | syndromes                                    | 8.73m  | 6.98ad  | 0 | 3.4ad  | 18.7cd | 9.74cd | 13.99cd | 5.33ad  | 18.07cd | 18.36cd |
|        | Other congenital anomalies with intellectual |        |         |   |        |        |        |         |         |         |         |
| RNG100 | disability                                   | 2.84m  | 4.19ad  | 0 | 1.13ad | 0      | 0      | 1.17cd  | 0       | 0       | 0       |

---

## Supplementary File 4 - Table S4.2

| Live births<br>in the<br>period<br>2012-2013 |               | 59832   | 14947  | 24934  | 101456 | 19550   | 4187   | 105169   | 65128  | 8389       | 33514    | 85376   | 23454    |
|----------------------------------------------|---------------|---------|--------|--------|--------|---------|--------|----------|--------|------------|----------|---------|----------|
| RNMR<br>Code                                 | ORPHA<br>Code | Toscana | Umbria | Marche | Lazio  | Abruzzo | Molise | Campania | Puglia | Basilicata | Calabria | Sicilia | Sardegna |
| RB0010                                       | 654           | 3.34ad  | 0      | 0      | 1.97ad | 0       | 0      | 0.95ad   | 1.54ad | 0          | 2.98ad   | 0       | 0        |
| RB0020                                       | 790           | 0       | 6.69ad | 0      | 2.96ad | 30.69ad | 0      | 2.85ad   | 6.14ad | 0          | 5.97ad   | 0       | 0        |
| RB0050                                       | 733           | 0       | 0      | 0      | 0      | 0       | 0      | 0.95ad   | 1.54cd | 0          | 0        | 0       | 0        |
| RC0010                                       | 199296        | 0       | 0      | 0      | 0      | 0       | 0      | 0        | 0      | 0          | 0        | 1.17cd  | 0        |
| RC0050                                       | 508           | 0       | 0      | 4.01ad | 0      | 0       | 0      | 0        | 0      | 0          | 0        | 0       | 0        |
| RC0170                                       |               | 0       | 0      | 0      | 0      | 0       | 0      | 0        | 0      | 0          | 0        | 0       | 0        |
| RC0180                                       | 205           | 3.34ad  | 0      | 0      | 0      | 0       | 0      | 0        | 0      | 0          | 0        | 0       | 0        |
| RD0010                                       |               | 0       | 0      | 0      | 0      | 0       | 0      | 0        | 0      | 11.92ad    | 0        | 0       | 0        |

|        |        |         |         |        |         |         |         |        |        |         |         |        |        |
|--------|--------|---------|---------|--------|---------|---------|---------|--------|--------|---------|---------|--------|--------|
| RD0040 | 2686   | 0       | 0       | 0      | 0.99ad  | 0       | 0       | 0      | 0      | 0       | 0       | 0      | 0      |
| RD0050 | 379    | 0       | 0       | 0      | 0       | 0       | 0       | 0      | 1.54cd | 0       | 2.98ad  | 0      | 0      |
| RF0010 | 726    | 0       | 0       | 0      | 0       | 0       | 0       | 0      | 0      | 0       | 0       | 0      | 0      |
| RF0030 | 506    | 0       | 0       | 0      | 0.99ad  | 0       | 0       | 0      | 0      | 0       | 0       | 0      | 0      |
| RF0040 | 778    | 0       | 0       | 0      | 0       | 0       | 0       | 0      | 0      | 0       | 0       | 0      | 0      |
| RF0060 | 98261  | 0       | 0       | 0      | 0       | 0       | 0       | 0      | 0      | 0       | 0       | 2.34cd | 0      |
| RF0100 | 803    | 0       | 0       | 0      | 0.99ad  | 0       | 0       | 0      | 1.54cd | 0       | 0       | 0      | 0      |
| RF0130 | 2382   | 0       | 0       | 0      | 0       | 0       | 0       | 0      | 0      | 0       | 0       | 0      | 0      |
| RF0140 | 3451   | 3.34ad  | 26.76ad | 4.01ad | 12.81ad | 15.35ad | 0       | 0.95cd | 1.54ad | 0       | 14.92ad |        | 4.26cd |
| RF0200 | 891    | 0       | 0       | 0      | 0       | 0       | 0       | 0      | 0      | 0       | 0       | 0      | 0      |
| RF0280 | 156071 | 0       | 0       | 0      | 0       | 0       | 0       | 0      | 1.54cd | 0       | 0       | 0      | 0      |
| RG0040 | 2331   | 3.34ad  | 6.69cd  | 8.02ad | 13.8ad  | 5.12ad  | 0       | 0      | 0      | 0       | 2.98ad  | 3.51ad | 0      |
| RG0100 | 774    | 0       | 0       | 0      | 0       | 0       | 0       | 0      | 1.54cd | 0       | 0       | 0      | 0      |
| RI0030 | 2070   | 0       | 0       | 0      | 0       | 0       | 0       | 0      | 1.54cd | 0       | 2.98cd  | 0      | 0      |
| RI0040 |        | 0       | 0       | 0      | 0       | 0       | 0       | 0      | 0      | 0       | 0       | 0      | 0      |
| RI0070 | 2290   | 0       | 0       | 0      | 0       | 0       | 0       | 0      | 0      | 0       | 0       | 0      | 0      |
| RI0080 | 36204  | 0       | 0       | 0      | 0       | 0       | 0       | 0      | 0      | 0       | 0       | 0      | 0      |
| RL0040 |        | 0       | 0       | 0      | 0.99ad  | 0       | 0       | 0      | 0      | 0       | 0       | 0      | 0      |
| RN0010 |        | 0       | 6.69ad  | 0      | 1.97ad  | 5.12ad  | 23.88ad | 0.95ad | 1.54ad | 23.84ad | 0       | 1.17cd | 8.53ad |
| RN0020 | 199642 | 0       | 0       | 0      | 0.99ad  | 0       | 0       | 0      | 0      | 0       | 2.98ad  | 0      | 0      |
| RN0040 | 475    | 0       | 0       | 0      | 0       | 0       | 0       | 0      | 0      | 0       | 0       | 1.17ad | 0      |
| RN0050 |        | 0       | 0       | 0      | 0.99ad  | 0       | 0       | 0      | 1.54cd | 35.76ad | 2.98ad  | 1.17ad | 0      |
| RN0060 | 2162   | 1.67ad  | 0       | 0      | 0       | 0       | 0       | 0      |        | 0       | 0       | 1.17cd | 4.26ad |
| RN0090 |        | 0       | 0       | 0      | 0.99ad  | 0       | 0       | 0      | 0      | 0       | 0       | 0      | 0      |
| RN0100 | 708    | 0       | 0       | 0      | 0       | 0       | 0       | 0      | 0      | 0       | 0       | 0      | 0      |
| RN0110 | 77     | 0       | 0       | 0      | 0.99ad  | 0       | 0       | 0.95cd | 0      | 0       | 0       | 1.17ad | 0      |
| RN0120 |        | 0       | 0       | 4.01ad | 0       | 0       | 0       | 0      | 0      | 0       | 0       | 0      | 0      |
| RN0140 |        | 0       | 0       | 0      | 0       | 0       | 0       | 0      | 0      | 0       | 0       | 0      | 0      |
|        |        |         |         |        |         |         |         |        |        |         |         |        |        |
| RN0160 |        | 10.03ad | 0       | 4.01ad | 8.87ad  | 25.58ad | 23.88ad | 0.95cd | 1.54cd | 0       | 0       | 1.17cd | 0      |
| RN0170 | 1201   | 0       | 0       | 8.02ad | 0.99ad  | 0       | 0       | 0      | 3.07cd | 0       | 0       | 0      | 0      |
| RN0180 | 1203   | 0       | 0       | 0      | 0.99ad  | 0       | 0       | 0      | 0      | 0       | 0       | 0      | 0      |
| RN0190 | 96346  | 6.69ad  | 0       | 8.02ad | 0.99ad  | 10.23ad | 0       | 0      | 6.14cd | 0       | 2.98cd  | 0      | 0      |



[illegible]

|        |        |        |        |        |        |        |   |         |        |         |        |        |         |
|--------|--------|--------|--------|--------|--------|--------|---|---------|--------|---------|--------|--------|---------|
| RN0910 | 374    | 6.69ad | 0      | 0      | 1.97ad | 0      | 0 | 0       | 3.07cd | 0       | 2.98ad | 3.51ad | 4.26cd  |
| RN0940 | 2322   | 1.67ad | 0      | 0      | 0      | 0      | 0 | 0       | 0      | 0       | 0      | 0      | 0       |
| RN0950 | 98861  | 0      | 6.69ad | 0      | 0      | 0      | 0 | 0       | 0      | 0       | 0      | 1.17ad | 0       |
| RN0990 | 570    | 0      | 0      | 0      | 0.99ad | 0      | 0 | 0       | 1.54cd | 0       | 0      | 0      | 0       |
| RN1000 | 245    | 0      | 0      | 0      | 0      | 0      | 0 | 0       | 0      | 0       | 0      | 0      | 0       |
| RN1010 | 648    | 1.67ad | 0      | 8.02ad | 7.89ad | 0      | 0 | 0.95cd  | 0      | 23.84ad | 2.98ad | 3.51ad | 0       |
| RN1040 | 710    | 0      | 0      | 0      | 0      | 0      | 0 | 0       | 0      | 0       | 0      | 0      | 0       |
| RN1080 | 813    | 0      | 0      | 0      | 0.99ad | 0      | 0 | 0       | 0      | 0       | 0      | 0      | 0       |
| RN1130 | 1297   | 0      | 0      | 0      | 0      | 0      | 0 | 0       | 0      | 0       | 0      | 0      | 0       |
| RN1140 | 107    | 0      | 0      | 0      | 0      | 0      | 0 | 0       | 0      | 0       | 0      | 0      | 0       |
| RN1170 | 744    | 0      | 0      | 0      | 0.99ad | 0      | 0 | 0       | 0      | 0       | 0      | 0      | 0       |
| RN1180 | 324764 | 0      | 0      | 0      | 0      | 0      | 0 | 0.95cd  | 0      | 0       | 0      | 0      | 0       |
| RN1210 | 819    | 0      | 0      | 0      | 0      | 0      | 0 | 0       | 0      | 0       | 0      | 1.17ad | 0       |
| RN1220 | 828    | 0      | 0      | 0      | 0.99ad | 0      | 0 | 0       | 0      | 0       | 0      | 0      | 0       |
| RN1240 | 857    | 0      | 0      | 0      | 0.99ad | 0      | 0 | 0       | 0      | 0       | 0      | 0      | 0       |
| RN1250 | 887    | 0      | 0      | 0      |        | 0      | 0 | 0       | 1.54cd | 0       | 0      | 0      | 0       |
| RN1270 | 904    | 3.34ad | 0      | 0      | 1.97ad | 5.12ad | 0 | 0.95ad  | 0      | 0       | 2.98ad | 1.17ad | 0       |
| RN1300 | 72     | 0      | 0      | 4.01ad | 0      | 0      | 0 | 0       | 0      | 0       | 0      | 0      | 0       |
| RN1310 | 739    | 0      | 6.69ad | 0      | 1.97ad | 5.12ad | 0 |         | 3.07cd | 0       | 0      | 3.51ad | 12.79ad |
| RN1320 | 558    | 0      | 0      | 0      | 0      | 0      | 0 | 0       | 0      | 0       | 0      | 0      | 0       |
| RN1330 | 908    | 1.67ad | 0      | 0      | 0      | 0      | 0 | 0.95cd  | 0      | 0       | 0      | 0      | 0       |
| RN1350 |        | 0      | 6.69ad | 0      | 0      | 0      | 0 | 0       | 0      | 0       | 0      | 3.51ad | 0       |
| RN1410 | 199    | 0      | 0      | 0      | 0      | 5.12ad | 0 | 0       | 0      | 0       | 0      | 0      | 0       |
| RN1460 | 2052   | 0      | 0      | 0      | 0      | 0      | 0 | 0       | 0      | 0       | 0      | 0      | 0       |
| RN1480 | 435    | 0      | 0      | 0      | 0      | 0      | 0 | 0       | 0      | 0       | 0      | 0      | 0       |
| RN1510 | 90308  | 0      | 0      | 0      | 0      | 0      | 0 | 0       | 0      | 0       | 0      | 0      | 0       |
| RN1530 | 500    | 0      | 0      | 0      | 0      | 0      | 0 | 0       | 0      | 0       | 0      | 1.17ad | 0       |
| RN1590 | 884    | 0      | 0      | 0      | 0      | 0      | 0 | 0       | 0      | 0       | 0      | 0      | 0       |
| RN1620 | 783    | 0      | 0      | 0      | 0      | 0      | 0 | 0       | 1.54cd | 0       | 0      | 0      | 0       |
| RN1760 | 912    | 0      | 0      | 0      | 0.99ad | 0      | 0 | 0.95cd  | 0      | 0       | 0      | 1.17ad | 0       |
| RP0010 | 290    | 0      | 0      | 0      | 0      | 0      | 0 | 14.26cd | 0      | 0       | 0      | 0      | 0       |
| RP0040 | 1915   | 0      | 0      | 0      | 2.96ad | 0      | 0 | 0       | 0      | 0       | 0      | 0      | 0       |
| RP0050 | 70590  | 0      | 0      | 0      | 0.99ad | 0      | 0 | 0       |        | 0       | 0      | 0      | 0       |

|        |         |         |        |         |         |         |        |         |         |         |         |        |
|--------|---------|---------|--------|---------|---------|---------|--------|---------|---------|---------|---------|--------|
| RBG010 | 8.36ad  | 0       | 0      | 2.96ad  | 10.23ad | 0       | 0.95ad | 1.54cd  | 0       | 2.34ad  | 0       |        |
| RCG010 | 0       | 0       | 4.01ad | 0       | 0       | 0       | 0      | 0       | 0       | 0       | 0       |        |
| RCG020 | 0       | 0       | 0      |         | 10.23ad | 0       | 1.9ad  | 1.54cd  | 11.92ad | 2.98ad  | 3.51ad  | 4.26ad |
| RCG040 | 31.76ad |         |        | 26.61ad | 25.58ad | 0       |        | 73.7cd  | 47.68cd | 26.85ad | 26.94ad | 0      |
| RCG050 | 1.67ad  | 6.69ad  | 0      | 3.94ad  | 0       | 0       | 0      | 0       | 0       | 0       | 0       | 8.53ad |
| RCG060 | 3.34ad  | 0       | 0      | 13.8ad  | 5.12ad  | 0       | 1.9cd  |         | 0       | 0       | 4.69ad  | 8.53ad |
| RCG070 |         | 20.07ad | 0      | 4.93ad  | 0       | 23.88ad | 1.9cd  |         | 0       | 2.98ad  | 1.17ad  | 0      |
| RCG080 | 3.34ad  | 0       | 0      | 0       | 0       | 0       | 0.95ad | 0       | 11.92ad | 2.98ad  | 1.17ad  | 0      |
| RCG090 | 0       | 0       | 0      | 0       | 0       | 0       | 0      | 0       | 0       | 0       | 1.17ad  | 0      |
| RCG100 | 0       | 0       | 0      | 0       | 0       | 0       | 0      | 1.54cd  | 0       | 0       | 0       | 0      |
| RCG140 | 0       | 0       | 0      | 0       | 0       | 0       | 0      | 1.54ad  | 0       | 0       | 0       | 0      |
| RCG150 | 0       | 13.38cd | 0      | 1.97ad  | 0       | 0       | 0      | 0       | 0       | 0       | 0       | 0      |
| RCG160 | 10.03ad | 6.69ad  | 4.01ad | 2.96ad  | 15.35ad | 0       | 3.8cd  |         | 0       | 2.34ad  | 4.26cd  |        |
| RDG010 | 20.06ad | 26.76cd | 4.01ad | 20.7ad  | 5.12ad  | 0       | 0      | 15.35cd | 0       | 2.98ad  | 5.86ad  | 0      |
| RDG020 | 3.34ad  | 0       |        | 5.91ad  | 0       | 0       | 0      | 10.75cd | 11.92ad | 0       | 2.34ad  | 0      |
| RDG030 | 0       | 0       | 0      | 0       | 0       | 0       | 0      | 0       | 0       | 0       | 0       | 0      |
| RDG040 | 0       | 0       | 0      | 0       | 0       | 0       | 0      | 0       | 0       | 0       | 0       | 0      |
| RFG010 | 0       | 0       | 0      | 0.99ad  | 0       | 0       | 0      | 0       | 0       | 0       | 1.17ad  | 4.26cd |
| RFG030 | 0       | 0       | 4.01ad | 1.97ad  | 0       | 0       | 0.95cd | 1.54cd  | 0       | 0       | 0       | 0      |
| RFG040 | 1.67ad  | 0       | 0      | 0       | 0       | 0       | 0.95ad | 0       | 0       | 0       | 1.17ad  | 0      |
| RFG050 | 0       |         | 4.01ad | 9.86ad  | 5.12ad  | 0       | 1.9cd  | 3.07cd  | 0       | 5.97ad  |         | 0      |
| RFG060 | 3.34ad  | 0       | 0      | 0.99ad  | 0       | 0       | 0      | 1.54cd  | 0       | 0       | 0       | 0      |
| RFG070 | 0       | 0       | 4.01ad | 0.99ad  | 0       | 0       | 0.95ad | 1.54ad  | 0       | 0       | 0       | 0      |
| RFG080 | 1.67ad  | 0       | 0      | 2.96ad  | 10.23ad | 0       |        |         | 11.92ad | 2.98ad  | 0       | 0      |

|        |        |         |         |         |         |         |        |        |         |        |         |        |
|--------|--------|---------|---------|---------|---------|---------|--------|--------|---------|--------|---------|--------|
| RFG090 | 0      | 0       | 0       | 0       | 0       | 0       | 0.95cd | 1.54cd | 0       | 0      | 0       | 4.26ad |
| RFG110 | 3.34ad | 0       | 0       | 3.94ad  | 0       | 0       | 0.95ad | 0      | 0       | 0      | 0       | 0      |
| RMG010 | 0      | 0       | 0       | 0       | 0       | 0       | 0      | 0      | 0       | 2.98ad | 0       | 0      |
| RNG010 | 0      | 0       | 0       | 4.93ad  | 0       | 0       | 0      | 0      | 0       | 0      | 0       | 0      |
| RNG020 | 0      | 0       | 4.01ad  | 2.96ad  | 5.12ad  | 0       | 0      | 1.54cd | 0       | 0      | 0       | 0      |
| RNG030 | 0      | 0       | 0       | 0.99ad  | 0       | 0       | 0      | 0      | 0       | 0      | 0       | 0      |
| RNG040 | 6.69ad | 6.69ad  |         | 24.64ad |         | 0       |        |        | 0       | 8.95ad | 4.69ad  | 4.26ad |
| RNG050 |        | 0       | 4.01ad  |         | 5.12ad  | 0       | 2.85cd | 3.07cd | 0       | 0      | 3.51ad  | 0      |
| RNG060 | 3.34ad | 0       | 0       | 9.86ad  | 10.23ad | 0       | 0      | 3.07cd | 0       | 8.95ad | 2.34ad  | 0      |
| RNG070 | 1.67ad | 0       | 8.02ad  | 2.96ad  | 5.12ad  | 0       |        | 1.54cd | 11.92ad | 0      | 4.69ad  | 0      |
| RNG080 | 1.67ad | 0       | 0       |         | 5.12ad  | 23.88ad | 3.8cd  | 4.61cd | 0       | 0      | 1.17ad  | 0      |
| RNG090 | 8.36ad | 13.38ad |         | 8.87ad  | 5.12ad  | 0       |        | 4.61cd | 0       | 8.95ad | 12.88ad | 0      |
| RNG100 | 8.36ad | 0       | 12.03ad | 5.91ad  | 0       | 0       | 1.9ad  |        | 11.92ad | 0      | 2.34ad  | 4.26ad |

---
