# Supplementary figures and images for: The Occurrence of 275 Rare Diseases and 47 Rare Disease Groups in Italy. Results from the National Registry of Rare Diseases
Source: MDPI journal article supplement (doi:10.3390/ijerph15071470), 2018-07-12

# Exemption codes notified (N)

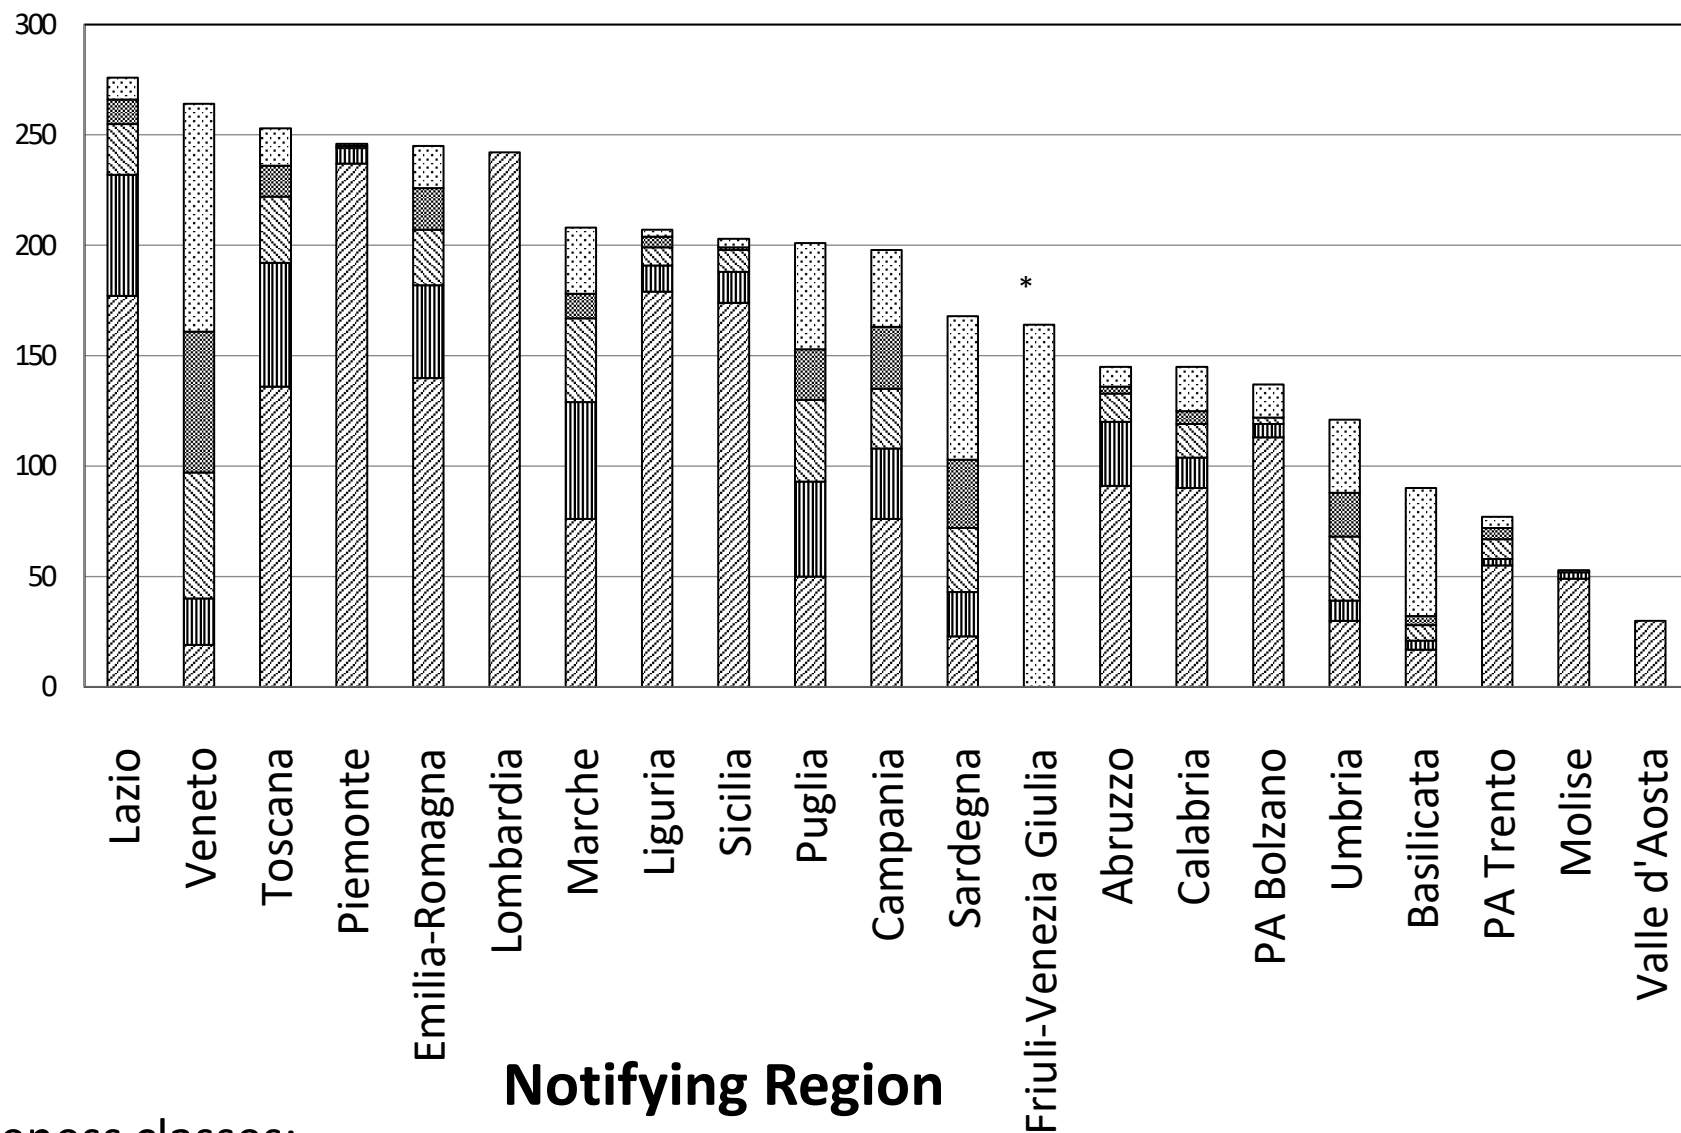

Completeness classes:

0-20%

20-40%

40-60%

60-80%

80-100%

Supplement: s1 [file s1]
